# Supplementary material for: Hematoma-derived exosomes of chronic subdural hematoma promote abnormal angiogenesis and inhibit hematoma absorption through miR-144-5p
Source: Aging (Albany NY). 2019 Dec 16;11(24):12147–64. doi: 10.18632/aging.102550 (PMC6949077; doi:10.18632/aging.102550)
Supplement: Supplementary Table 3 [file aging-11-102550-s003..xlsx]

## Sheet: Sheet1
miRNA expression for all samples (normalized). Column A: Mature miRNA, the mature miRNA name. Column B: Pre-miRNA, the pre-miRNA name. Column C: Sequence, the mature miRNA sequence. Column D ~ L: Tag Counts (normalized), the normalized tag counts of the mature miRNA (tpm). Note: 1, tpm: the copy number of transcripts per million based on the total number of tags aligned to all pre-miRNAs (both kn…
miRNA Information			Tag Counts (normalized)
mature-miRNA	pre-miRNA	mature-sequence	C-1	C-2	C-3	H-1	H-2	H-3	S-1	S-2	S-3
hsa-let-7a-2-3p	hsa-let-7a-2	CUGUACAGCCUCCUAGCUUUCC				2					3		mature-miRNA
hsa-let-7a-3p	hsa-let-7a-1	CUAUACAAUCUACUGUCUUUC	9	8	34	38	13	13		16	16		hsa-miR-21-5p
hsa-let-7a-5p	hsa-let-7a-1	UGAGGUAGUAGGUUGUAUAGUU	2436	2354	956	3324	1046	6852	1065	716	1670		hsa-miR-novel-chr8_34113
hsa-let-7b-3p	hsa-let-7b	CUAUACAACCUACUGCCUUCCC				0							hsa-miR-363-3p
hsa-let-7b-5p	hsa-let-7b	UGAGGUAGUAGGUUGUGUGGUU	4558	3104	7609	4613	5664	12106	1559	6006	3556		hsa-miR-144-3p
hsa-let-7c-3p	hsa-let-7c	CUGUACAACCUUCUAGCUUUCC			4	4		1			2		hsa-miR-novel-chr11_1898
hsa-let-7c-5p	hsa-let-7c	UGAGGUAGUAGGUUGUAUGGUU	2094	2048	20577	11833	109	1120	4432	1171	17300		hsa-miR-543
hsa-let-7d-3p	hsa-let-7d	CUAUACGACCUGCUGCCUUUCU	168	74	525	477	17	30	53	21	138		hsa-miR-novel-chr17_11455
hsa-let-7d-5p	hsa-let-7d	AGAGGUAGUAGGUUGCAUAGUU	983	906	1922	1725	308	2910	1363	360	2254		hsa-miR-592
hsa-let-7e-3p	hsa-let-7e	CUAUACGGCCUCCUAGCUUUCC			29	12	0		8	4	21		hsa-miR-16-5p
hsa-let-7e-5p	hsa-let-7e	UGAGGUAGGAGGUUGUAUAGUU	224	272	307	219	14	104	463	168	1284		hsa-miR-155-5p
hsa-let-7f-2-3p	hsa-let-7f-2	CUAUACAGUCUACUGUCUUUCC					0						hsa-miR-182-5p
hsa-let-7f-5p	hsa-let-7f-1	UGAGGUAGUAGAUUGUAUAGUU	4270	4184	2416	8517	2711	14856	4279	2287	11750		hsa-miR-15b-5p
hsa-let-7g-3p	hsa-let-7g	CUGUACAGGCCACUGCCUUGC			1		0	1		5			hsa-miR-144-5p
hsa-let-7g-5p	hsa-let-7g	UGAGGUAGUAGUUUGUACAGUU	5581	5002	10059	13202	4723	13569	7443	6678	20602
hsa-let-7i-3p	hsa-let-7i	CUGCGCAAGCUACUGCCUUGCU				2
hsa-let-7i-5p	hsa-let-7i	UGAGGUAGUAGUUUGUGCUGUU	10713	9023	31592	41733	36182	39263	11876	34153	28489
hsa-miR-1-3p	hsa-mir-1-2	UGGAAUGUAAAGAAGUAUGUAU	19258	20580	1631	1507	957	5006	1453	5028	1497
hsa-miR-100-5p	hsa-mir-100	AACCCGUAGAUCCGAACUUGUG	507	1044	8858	4229	1003	537	1897	996	5209
hsa-miR-101-3p	hsa-mir-101-1	UACAGUACUGUGAUAACUGAA	341	281	867	1113	1136	473	464	2125	794
hsa-miR-103a-2-5p	hsa-mir-103a-2	AGCUUCUUUACAGUGCUGCCUUG			0			1
hsa-miR-103a-3p	hsa-mir-103a-2	AGCAGCAUUGUACAGGGCUAUGA	583	611	514	1505	998	1405	682	747	1092
hsa-miR-106a-5p	hsa-mir-106a	AAAAGUGCUUACAGUGCAGGUAG	9	43	13	49	86	119	30	97	2
hsa-miR-106b-3p	hsa-mir-106b	CCGCACUGUGGGUACUUGCUGC	54	33	25	21	3	13	20	21	27
hsa-miR-106b-5p	hsa-mir-106b	UAAAGUGCUGACAGUGCAGAU	18	10	17	50	49	165	41	195	5
hsa-miR-107	hsa-mir-107	AGCAGCAUUGUACAGGGCUAUCA			8	9	2		27	5	47
hsa-miR-10a-5p	hsa-mir-10a	UACCCUGUAGAUCCGAAUUUGUG	64	64	16	14	2	12	14	14	11
hsa-miR-10b-3p	hsa-mir-10b	ACAGAUUCGAUUCUAGGGGAAU			1
hsa-miR-10b-5p	hsa-mir-10b	UACCCUGUAGAACCGAAUUUGUG	138	56	22	10	2	9	57	36	21
hsa-miR-1180-3p	hsa-mir-1180	UUUCCGGCUCGCGUGGGUGUGU	31		3	4	9	11		15	1
hsa-miR-1197	hsa-mir-1197	UAGGACACAUGGUCUACUUCU			6	6			4		9
hsa-miR-122-5p	hsa-mir-122	UGGAGUGUGACAAUGGUGUUUG	8202	7352	499	345	304	1754	295	1564	306
hsa-miR-1224-5p	hsa-mir-1224	GUGAGGACUCGGGAGGUGG					1	2
hsa-miR-1226-5p	hsa-mir-1226	GUGAGGGCAUGCAGGCCUGGAUGGGG	7
hsa-miR-124-3p	hsa-mir-124-1	UAAGGCACGCGGUGAAUGCC	5		313	221	3	2	54	8	613
hsa-miR-124-5p	hsa-mir-124-1	CGUGUUCACAGCGGACCUUGAU			7	10		1	3	3	6
hsa-miR-1246	hsa-mir-1246	AAUGGAUUUUUGGAGCAGG	63	98	6	34	151	124	4	9
hsa-miR-1249-3p	hsa-mir-1249	ACGCCCUUCCCCCCCUUCUUCA	4		4	4	1		3	36	65
hsa-miR-1250-5p	hsa-mir-1250	ACGGUGCUGGAUGUGGCCUUU					0	1
hsa-miR-1251-3p	hsa-mir-1251	CGCUUUGCUCAGCCAGUGUAG				1
hsa-miR-1251-5p	hsa-mir-1251	ACUCUAGCUGCCAAAGGCGCU			1	0					1
hsa-miR-1255a	hsa-mir-1255a	AGGAUGAGCAAAGAAAGUAGAUU		5		1	2	4
hsa-miR-1255b-5p	hsa-mir-1255b-1	CGGAUGAGCAAAGAAAGUGGUU	6		2	3	8	21	2	8
hsa-miR-125a-3p	hsa-mir-125a	ACAGGUGAGGUUCUUGGGAGCC				0
hsa-miR-125a-5p	hsa-mir-125a	UCCCUGAGACCCUUUAACCUGUGA	25	10	86	142	3	11	125	4	49
hsa-miR-125b-1-3p	hsa-mir-125b-1	ACGGGUUAGGCUCUUGGGAGCU	4	10	15	7	2		10	10	10
hsa-miR-125b-5p	hsa-mir-125b-1	UCCCUGAGACCCUAACUUGUGA	215	240	2716	2811	61	90	735	96	1007
hsa-miR-126-3p	hsa-mir-126	UCGUACCGUGAGUAAUAAUGCG	3952	3326	433	911	660	3390	440	1113	1435
hsa-miR-126-5p	hsa-mir-126	CAUUAUUACUUUUGGUACGCG	49	33	23	64	20	36	12	15	75
hsa-miR-1266-5p	hsa-mir-1266	CCUCAGGGCUGUAGAACAGGGCU						3
hsa-miR-1268a	hsa-mir-1268a	CGGGCGUGGUGGUGGGGG			0	1
hsa-miR-127-3p	hsa-mir-127	UCGGAUCCGUCUGAGCUUGGCU	871	1075	15365	7301	52	509	3712	1910	7004
hsa-miR-127-5p	hsa-mir-127	CUGAAGCUCAGAGGGCUCUGAU			24	28	0		14	5	37
hsa-miR-1270	hsa-mir-1270	CUGGAGAUAUGGAAGAGCUGUGU	11		2	1	1	1
hsa-miR-1271-5p	hsa-mir-1271	CUUGGCACCUAGCAAGCACUCA			1	2	1
hsa-miR-1273h-3p	hsa-mir-1273h	CUGCAGACUCGACCUCCCAGGC				1	1
hsa-miR-1276	hsa-mir-1276	UAAAGAGCCCUGUGGAGACA						1
hsa-miR-1278	hsa-mir-1278	UAGUACUGUGCAUAUCAUCUAU			1	2	2	5		15
hsa-miR-128-1-5p	hsa-mir-128-1	CGGGGCCGUAGCACUGUCUGAGA			9	9		3	3		4
hsa-miR-128-3p	hsa-mir-128-1	UCACAGUGAACCGGUCUCUUU	524	238	8543	7749	58	171	887	324	2294
hsa-miR-1285-3p	hsa-mir-1285-1	UCUGGGCAACAAAGUGAGACCU			2	1	3	1		5
hsa-miR-1287-5p	hsa-mir-1287	UGCUGGAUCAGUGGUUCGAGUC				1	4	4	4	2
hsa-miR-1288-3p	hsa-mir-1288	UGGACUGCCCUGAUCUGGAGA			1		1
hsa-miR-129-1-3p	hsa-mir-129-1	AAGCCCUUACCCCAAAAAGUAU			2	2				3	2
hsa-miR-129-2-3p	hsa-mir-129-2	AAGCCCUUACCCCAAAAAGCAU			19	9			16		31
hsa-miR-129-5p	hsa-mir-129-1	CUUUUUGCGGUCUGGGCUUGC	86	92	2562	1873	6	39	415	109	1017
hsa-miR-1292-5p	hsa-mir-1292	UGGGAACGGGUUCCGGCAGACGCUG								2
hsa-miR-1294	hsa-mir-1294	UGUGAGGUUGGCAUUGUUGUCU			0	1	1	1		1
hsa-miR-1295a	hsa-mir-1295a	UUAGGCCGCAGAUCUGGGUGA				0
hsa-miR-1296-5p	hsa-mir-1296	UUAGGGCCCUGGCUCCAUCUCC				1		2
hsa-miR-1298-5p	hsa-mir-1298	UUCAUUCGGCUGUCCAGAUGUA	13	6	264	150	2	14	208	26	221
hsa-miR-1299	hsa-mir-1299	UUCUGGAAUUCUGUGUGAGGGA	27		3	3	0	7		11
hsa-miR-1301-3p	hsa-mir-1301	UUGCAGCUGCCUGGGAGUGACUUC				3
hsa-miR-1303	hsa-mir-1303	UUUAGAGACGGGGUCUUGCUCU				0	0
hsa-miR-1304-5p	hsa-mir-1304	UUUGAGGCUACAGUGAGAUGUG			1	0	7	15
hsa-miR-1307-3p	hsa-mir-1307	ACUCGGCGUGGCGUCGGUCGUG	16		2	6	3	7	3
hsa-miR-1307-5p	hsa-mir-1307	UCGACCGGACCUCGACCGGCU			1	2	8	8	4	44
hsa-miR-130a-3p	hsa-mir-130a	CAGUGCAAUGUUAAAAGGGCAU			0	0	0
hsa-miR-130b-3p	hsa-mir-130b	CAGUGCAAUGAUGAAAGGGCAU			0			1
hsa-miR-130b-5p	hsa-mir-130b	ACUCUUUCCCUGUUGCACUAC	20	21	1	0	0	4	5	5
hsa-miR-132-3p	hsa-mir-132	UAACAGUCUACAGCCAUGGUCG	11	5	632	514	4	7	111	11	514
hsa-miR-132-5p	hsa-mir-132	ACCGUGGCUUUCGAUUGUUACU	16	13	262	102	3	36	80	25	146
hsa-miR-133a-3p	hsa-mir-133a-1	UUUGGUCCCCUUCAACCAGCUG			4	2	1	1			5
hsa-miR-133a-5p	hsa-mir-133a-1	AGCUGGUAAAAUGGAACCAAAU	5		0	1	0	3			1
hsa-miR-133b	hsa-mir-133b	UUUGGUCCCCUUCAACCAGCUA			0
hsa-miR-134-5p	hsa-mir-134	UGUGACUGGUUGACCAGAGGGG	180	126	925	517	15	44	189	66	300
hsa-miR-1343-3p	hsa-mir-1343	CUCCUGGGGCCCGCACUCUCGC					0
hsa-miR-135a-5p	hsa-mir-135a-1	UAUGGCUUUUUAUUCCUAUGUGA		7	25	14	0	0	18	3	43
hsa-miR-135b-3p	hsa-mir-135b	AUGUAGGGCUAAAAGCCAUGGG			0	0					1
hsa-miR-135b-5p	hsa-mir-135b	UAUGGCUUUUCAUUCCUAUGUGA			33	21	0	4	22	5	39
hsa-miR-136-3p	hsa-mir-136	CAUCAUCGUCUCAAAUGAGUCU	13	21	919	459	3	7	116	66	1808
hsa-miR-136-5p	hsa-mir-136	ACUCCAUUUGUUUUGAUGAUGGA				2					1
hsa-miR-137	hsa-mir-137	UUAUUGCUUAAGAAUACGCGUAG			19	12	0	1	19		44
hsa-miR-138-2-3p	hsa-mir-138-2	GCUAUUUCACGACACCAGGGUU			6	2					4
hsa-miR-138-5p	hsa-mir-138-2	AGCUGGUGUUGUGAAUCAGGCCG			107	59	0	0	24	18	121
hsa-miR-139-3p	hsa-mir-139	UGGAGACGCGGCCCUGUUGGAGU	22	7	49	32	1	4	8	5	13
hsa-miR-139-5p	hsa-mir-139	UCUACAGUGCACGUGUCUCCAGU	83	72	986	241	8	33	99	69	1293
hsa-miR-140-3p	hsa-mir-140	UACCACAGGGUAGAACCACGG	92	48	248	211	272	384	129	817	201
hsa-miR-140-5p	hsa-mir-140	CAGUGGUUUUACCCUAUGGUAG	27	48	74	64	35	46	48	150	69
hsa-miR-141-3p	hsa-mir-141	UAACACUGUCUGGUAAAGAUGG									1
hsa-miR-142-3p	hsa-mir-142	UGUAGUGUUUCCUACUUUAUGGA	58	52	4	69	13	70	26	36	7
hsa-miR-142-5p	hsa-mir-142	CAUAAAGUAGAAAGCACUACU	72	33	22	165	95	260	5	151	3
hsa-miR-143-3p	hsa-mir-143	UGAGAUGAAGCACUGUAGCUC	1575	1553	318	337	78	329	341	483	1411
hsa-miR-143-5p	hsa-mir-143	GGUGCAGUGCUGCAUCUCUGGU			1	1	0	1	3	8	3
hsa-miR-144-3p	hsa-mir-144	UACAGUAUAGAUGAUGUACU	422	141	187	1242	1131	3809	260	380	6
hsa-miR-144-5p	hsa-mir-144	GGAUAUCAUCAUAUACUGUAAG	29	24	14	371	406	728	23	21	10
hsa-miR-145-3p	hsa-mir-145	GGAUUCCUGGAAAUACUGUUCU			2	4		1			3
hsa-miR-145-5p	hsa-mir-145	GUCCAGUUUUCCCAGGAAUCCCU	27	43	20	18	4	4	15	8	48
hsa-miR-1468-5p	hsa-mir-1468	CUCCGUUUGCCUGUUUCGCUG		5			0
hsa-miR-146a-5p	hsa-mir-146a	UGAGAACUGAAUUCCAUGGGUU	543	482	387	636	361	179	178	301	322
hsa-miR-146b-3p	hsa-mir-146b	UGCCCUGUGGACUCAGUUCUGG				2	1
hsa-miR-146b-5p	hsa-mir-146b	UGAGAACUGAAUUCCAUAGGCU	337	198	886	1339	282	476	302	555	624
hsa-miR-148a-3p	hsa-mir-148a	UCAGUGCACUACAGAACUUUGU	14988	13799	7467	4645	4726	5091	2585	5832	4967
hsa-miR-148a-5p	hsa-mir-148a	AAAGUUCUGAGACACUCCGACU			14	11	3	3		7	7
hsa-miR-148b-3p	hsa-mir-148b	UCAGUGCAUCACAGAACUUUGU	666	362	591	665	503	344	453	728	677
hsa-miR-149-5p	hsa-mir-149	UCUGGCUCCGUGUCUUCACUCCC	40		349	53	1	7	45	14	47
hsa-miR-150-5p	hsa-mir-150	UCUCCCAACCCUUGUACCAGUG	449	222	93	594	128	159	161	127	279
hsa-miR-151a-3p	hsa-mir-151a	CUAGACUGAAGCUCCUUGAGG	1619	1329	292	227	864	997	214	1352	64
hsa-miR-151a-5p	hsa-mir-151a	UCGAGGAGCUCACAGUCUAGU	68	30	8	12	8	16	5	12	23
hsa-miR-151b	hsa-mir-151b	UCGAGGAGCUCACAGUCU			0	1	1	0			1
hsa-miR-152-3p	hsa-mir-152	UCAGUGCAUGACAGAACUUGG	139	169	264	323	108	48	93	314	601
hsa-miR-152-5p	hsa-mir-152	AGGUUCUGUGAUACACUCCGACU			1	1				2	2
hsa-miR-153-3p	hsa-mir-153-1	UUGCAUAGUCACAAAAGUGAUC			12	11	0		3	1	23
hsa-miR-154-3p	hsa-mir-154	AAUCAUACACGGUUGACCUAUU			0	0		1	4	3	10
hsa-miR-154-5p	hsa-mir-154	UAGGUUAUCCGUGUUGCCUUCG	43	29	2816	911	4	22	101	25	663
hsa-miR-155-5p	hsa-mir-155	UUAAUGCUAAUCGUGAUAGGGGU	123	86	10	467	84	83	35	66	12
hsa-miR-15a-5p	hsa-mir-15a	UAGCAGCACAUAAUGGUUUGUG			3	12	4	12	5	13	1
hsa-miR-15b-3p	hsa-mir-15b	CGAAUCAUUAUUUGCUGCUCUA	38		7	27	19	99	4	33
hsa-miR-15b-5p	hsa-mir-15b	UAGCAGCACAUCAUGGUUUACA	47	41	12	238	168	584	29	105	5
hsa-miR-16-1-3p	hsa-mir-16-1	CCAGUAUUAACUGUGCUGCUGA	7		0	1	2	3	3	2
hsa-miR-16-2-3p	hsa-mir-16-2	CCAAUAUUACUGUGCUGCUUUA	22	33	9	25	16	127	3	25	2
hsa-miR-16-5p	hsa-mir-16-1	UAGCAGCACGUAAAUAUUGGCG	127	93	138	546	1536	918	180	1514	96
hsa-miR-17-3p	hsa-mir-17	ACUGCAGUGAAGGCACUUGUAG					0
hsa-miR-17-5p	hsa-mir-17	CAAAGUGCUUACAGUGCAGGUAG	189	172	96	306	458	703	166	851	66
hsa-miR-181a-2-3p	hsa-mir-181a-2	ACCACUGACCGUUGACUGUACC	13		1	1	0	2	3	3	2
hsa-miR-181a-3p	hsa-mir-181a-1	ACCAUCGACCGUUGAUUGUACC	7		8	13	2	5	18	5	47
hsa-miR-181a-5p	hsa-mir-181a-2	AACAUUCAACGCUGUCGGUGAGU	88	129	1232	512	44	106	421	220	800
hsa-miR-181b-3p	hsa-mir-181b-1	CUCACUGAACAAUGAAUGCAA			0	0	0
hsa-miR-181b-5p	hsa-mir-181b-1	AACAUUCAUUGCUGUCGGUGGGU	22	31	340	158	7	17	76	29	107
hsa-miR-181c-3p	hsa-mir-181c	AACCAUCGACCGUUGAGUGGAC				0					1
hsa-miR-181c-5p	hsa-mir-181c	AACAUUCAACCUGUCGGUGAGU		6	50	31	1	1	7	10	41
hsa-miR-181d-5p	hsa-mir-181d	AACAUUCAUUGUUGUCGGUGGGU	17	15	403	160	1	7	44	18	91
hsa-miR-182-3p	hsa-mir-182	UGGUUCUAGACUUGCCAACUA									2
hsa-miR-182-5p	hsa-mir-182	UUUGGCAAUGGUAGAACUCACACU	39	24	99	168	102	480	19	152	8
hsa-miR-183-5p	hsa-mir-183	UAUGGCACUGGUAGAAUUCACU	92	57	481	612	187	699	76	364	1692
hsa-miR-184	hsa-mir-184	UGGACGGAGAACUGAUAAGGGU	52	64	36	16	22	17		15	32
hsa-miR-185-5p	hsa-mir-185	UGGAGAGAAAGGCAGUUCCUGA	2644	2675	5957	6475	22368	9270	5359	17246	1678
hsa-miR-186-5p	hsa-mir-186	CAAAGAAUUCUCCUUUUGGGCU	312	362	809	864	905	983	354	1840	696
hsa-miR-187-3p	hsa-mir-187	UCGUGUCUUGUGUUGCAGCCGG			11	4					5
hsa-miR-188-5p	hsa-mir-188	CAUCCCUUGCAUGGUGGAGGG			5	2	1	1		3	6
hsa-miR-18a-3p	hsa-mir-18a	ACUGCCCUAAGUGCUCCUUCUGG			1	1	1	4
hsa-miR-18a-5p	hsa-mir-18a	UAAGGUGCAUCUAGUGCAGAUAG	7		5	9	7	35	4	36
hsa-miR-18b-5p	hsa-mir-18b	UAAGGUGCAUCUAGUGCAGUUAG					0
hsa-miR-1908-5p	hsa-mir-1908	CGGCGGGGACGGCGAUUGGUC					1
hsa-miR-190a-5p	hsa-mir-190a	UGAUAUGUUUGAUAUAUUAGGU				0	1	3
hsa-miR-190b	hsa-mir-190b	UGAUAUGUUUGAUAUUGGGUU					0
hsa-miR-191-3p	hsa-mir-191	GCUGCGCUUGGAUUUCGUCCCC		7
hsa-miR-191-5p	hsa-mir-191	CAACGGAAUCCCAAAAGCAGCUG	960	949	1647	1114	375	1198	578	536	765
hsa-miR-1910-3p	hsa-mir-1910	GAGGCAGAAGCAGGAUGACA					1
hsa-miR-192-5p	hsa-mir-192	CUGACCUAUGAAUUGACAGCC	141	81	238	275	265	440	144	694	103
hsa-miR-193a-5p	hsa-mir-193a	UGGGUCUUUGCGGGCGAGAUGA	18	5	1	4	3	13		8	4
hsa-miR-193b-3p	hsa-mir-193b	AACUGGCCCUCAAAGUCCCGCU				3	1
hsa-miR-193b-5p	hsa-mir-193b	CGGGGUUUUGAGGGCGAGAUGA	11		7	2	1				1
hsa-miR-194-5p	hsa-mir-194-1	UGUAACAGCAACUCCAUGUGGA	24	10	43	109	159	173	25	208	67
hsa-miR-195-3p	hsa-mir-195	CCAAUAUUGGCUGUGCUGCUCC	7	5	12	1					6
hsa-miR-195-5p	hsa-mir-195	UAGCAGCACAGAAAUAUUGGC	34	10	203	103	3	6	53	22	161
hsa-miR-196a-5p	hsa-mir-196a-1	UAGGUAGUUUCAUGUUGUUGGG	4
hsa-miR-196b-5p	hsa-mir-196b	UAGGUAGUUUCCUGUUGUUGGG	11			2	4	10		4
hsa-miR-197-3p	hsa-mir-197	UUCACCACCUUCUCCACCCAGC	43	19	2	5	3	4	7	4	2
hsa-miR-1976	hsa-mir-1976	CCUCCUGCCCUCCUUGCUGU					1	1
hsa-miR-199a-3p	hsa-mir-199a-1	ACAGUAGUCUGCACAUUGGUUA	102	114	8	15	12	24	29	16	30
hsa-miR-199a-5p	hsa-mir-199a-1	CCCAGUGUUCAGACUACCUGUUC	113	130	11	15	7	22	37	33	35
hsa-miR-199b-3p	hsa-mir-199b	ACAGUAGUCUGCACAUUGGUUA	102	114	8	15	12	24	29	16	30
hsa-miR-199b-5p	hsa-mir-199b	CCCAGUGUUUAGACUAUCUGUUC	31	24	1	5	1	5	2	5	3
hsa-miR-19a-3p	hsa-mir-19a	UGUGCAAAUCUAUGCAAAACUGA			14	42	67	69	8	101
hsa-miR-19b-3p	hsa-mir-19b-1	UGUGCAAAUCCAUGCAAAACUGA		5	17	49	106	123	20	306	7
hsa-miR-200a-3p	hsa-mir-200a	UAACACUGUCUGGUAACGAUGU	88	86	387	2393	3	19	33	42	4683
hsa-miR-200a-5p	hsa-mir-200a	CAUCUUACCGGACAGUGCUGGA	9	14	8	81	0	1			75
hsa-miR-200b-3p	hsa-mir-200b	UAAUACUGCCUGGUAAUGAUGA	31	48	98	1421	12	10	44	21	978
hsa-miR-200b-5p	hsa-mir-200b	CAUCUUACUGGGCAGCAUUGGA			5	30	0				11
hsa-miR-200c-3p	hsa-mir-200c	UAAUACUGCCGGGUAAUGAUGGA	34	322	39	341	12	31	19	55	698
hsa-miR-203a-3p	hsa-mir-203a	GUGAAAUGUUUAGGACCACUAG		4	9	7	2	3	4	10	12
hsa-miR-204-3p	hsa-mir-204	GCUGGGAAGGCAAAGGGACGU		4	14	9		1			1
hsa-miR-204-5p	hsa-mir-204	UUCCCUUUGUCAUCCUAUGCCU		5	158	146	2	7	82	25	264
hsa-miR-205-5p	hsa-mir-205	UCCUUCAUUCCACCGGAGUCUG	7		0	0	0			4	3
hsa-miR-206	hsa-mir-206	UGGAAUGUAAGGAAGUGUGUGG	132	129	2187	397	5	29	170	37	786
hsa-miR-208a-3p	hsa-mir-208a	AUAAGACGAGCAAAAAGCUUGU				0					1
hsa-miR-208b-3p	hsa-mir-208b	AUAAGACGAACAAAAGGUUUGU			1
hsa-miR-20a-5p	hsa-mir-20a	UAAAGUGCUUAUAGUGCAGGUAG	355	279	480	1322	2248	2781	581	3209	86
hsa-miR-20b-5p	hsa-mir-20b	CAAAGUGCUCAUAGUGCAGGUAG	135	38	18	106	197	256	60	355	2
hsa-miR-21-3p	hsa-mir-21	CAACACCAGUCGAUGGGCUGU			0		1		5
hsa-miR-21-5p	hsa-mir-21	UAGCUUAUCAGACUGAUGUUGA	5186	4050	6685	35429	18241	15260	3289	2062	3602
hsa-miR-210-3p	hsa-mir-210	CUGUGCGUGUGACAGCGGCUGA	48	27	62	312	122	69	75	244	60
hsa-miR-2110	hsa-mir-2110	UUGGGGAAACGGCCGCUGAGUG		21	1	3	12	18		2
hsa-miR-2115-3p	hsa-mir-2115	CAUCAGAAUUCAUGGAGGCUAG			0
hsa-miR-212-3p	hsa-mir-212	UAACAGUCUCCAGUCACGGCC			9	6			3		8
hsa-miR-212-5p	hsa-mir-212	ACCUUGGCUCUAGACUGCUUACU	11		29	20	0	2			1
hsa-miR-214-3p	hsa-mir-214	ACAGCAGGCACAGACAGGCAGU		12	1		1	2	3		2
hsa-miR-214-5p	hsa-mir-214	UGCCUGUCUACACUUGCUGUGC			1		0	1		2	2
hsa-miR-215-5p	hsa-mir-215	AUGACCUAUGAAUUGACAGAC	22	19	1	2		0		10
hsa-miR-216a-5p	hsa-mir-216a	UAAUCUCAGCUGGCAACUGUGA			4	2
hsa-miR-216b-5p	hsa-mir-216b	AAAUCUCUGCAGGCAAAUGUGA			4	2
hsa-miR-217	hsa-mir-217	UACUGCAUCAGGAACUGAUUGGA				0
hsa-miR-218-2-3p	hsa-mir-218-2	CAUGGUUCUGUCAAGCACCGCG								1
hsa-miR-218-5p	hsa-mir-218-1	UUGUGCUUGAUCUAACCAUGU	147	93	5353	1331	9	110	469	169	1710
hsa-miR-219a-1-3p	hsa-mir-219a-1	AGAGUUGAGUCUGGACGUCCCG			0		1
hsa-miR-219a-2-3p	hsa-mir-219a-2	AGAAUUGUGGCUGGACAUCUGU	45	7	409	373	2	11	214	9	411
hsa-miR-219a-5p	hsa-mir-219a-1	UGAUUGUCCAAACGCAAUUCU			6	5	0				4
hsa-miR-219b-5p	hsa-mir-219b	AGAUGUCCAGCCACAAUUCUCG					0
hsa-miR-22-3p	hsa-mir-22	AAGCUGCCAGUUGAAGAACUGU	767	806	599	717	439	408	261	1054	743
hsa-miR-22-5p	hsa-mir-22	AGUUCUUCAGUGGCAAGCUUUA		10	2	5	2	7	7		9
hsa-miR-221-3p	hsa-mir-221	AGCUACAUUGUCUGCUGGGUUUC	273	147	1223	710	39	73	201	117	358
hsa-miR-221-5p	hsa-mir-221	ACCUGGCAUACAAUGUAGAUUU			1	2					2
hsa-miR-222-3p	hsa-mir-222	AGCUACAUCUGGCUACUGGGU	37	26	152	136	69	36	18	60	90
hsa-miR-222-5p	hsa-mir-222	CUCAGUAGCCAGUGUAGAUCCU			0
hsa-miR-223-3p	hsa-mir-223	UGUCAGUUUGUCAAAUACCCCA	238	141	21	34	66	44	68	142	25
hsa-miR-223-5p	hsa-mir-223	CGUGUAUUUGACAAGCUGAGUU	65	26	9	9	14	11	8	29	4
hsa-miR-224-5p	hsa-mir-224	CAAGUCACUAGUGGUUCCGUU	4		0	1		1		4
hsa-miR-2276-3p	hsa-mir-2276	UCUGCAAGUGUCAGAGGCGAGG					0
hsa-miR-2278	hsa-mir-2278	GAGAGCAGUGUGUGUUGCCUGG					1
hsa-miR-2355-3p	hsa-mir-2355	AUUGUCCUUGCUGUUUGGAGAU					1
hsa-miR-23a-3p	hsa-mir-23a	AUCACAUUGCCAGGGAUUUCC	240	126	177	160	49	36	90	69	170
hsa-miR-23a-5p	hsa-mir-23a	GGGGUUCCUGGGGAUGGGAUUU				1		2
hsa-miR-23b-3p	hsa-mir-23b	AUCACAUUGCCAGGGAUUACC	43	50	49	34	11	15	116	28	193
hsa-miR-23b-5p	hsa-mir-23b	UGGGUUCCUGGCAUGCUGAUUU				1					1
hsa-miR-24-1-5p	hsa-mir-24-1	UGCCUACUGAGCUGAUAUCAGU									2
hsa-miR-24-3p	hsa-mir-24-1	UGGCUCAGUUCAGCAGGAACAG	412	291	1181	451	71	148	209	171	278
hsa-miR-25-3p	hsa-mir-25	CAUUGCACUUGUCUCGGUCUGA	5727	3872	4161	8631	22328	8529	2912	20376	402
hsa-miR-25-5p	hsa-mir-25	AGGCGGAGACUUGGGCAAUUG			1	2	2	2		12
hsa-miR-2682-5p	hsa-mir-2682	CAGGCAGUGACUGUUCAGACGUC							3
hsa-miR-26a-1-3p	hsa-mir-26a-1	CCUAUUCUUGGUUACUUGCACG						2
hsa-miR-26a-2-3p	hsa-mir-26a-2	CCUAUUCUUGAUUACUUGUUUC			0	1	0			2
hsa-miR-26a-5p	hsa-mir-26a-1	UUCAAGUAAUCCAGGAUAGGCU	10113	8064	19399	10961	2082	8476	9017	6203	17480
hsa-miR-26b-3p	hsa-mir-26b	CCUGUUCUCCAUUACUUGGCUC			2	1	0
hsa-miR-26b-5p	hsa-mir-26b	UUCAAGUAAUUCAGGAUAGGU	1129	720	1075	4020	1800	8236	433	2957	476
hsa-miR-27a-3p	hsa-mir-27a	UUCACAGUGGCUAAGUUCCGC	85	107	45	65	11	29	41	56	74
hsa-miR-27a-5p	hsa-mir-27a	AGGGCUUAGCUGCUUGUGAGCA	52	74	6	7	4	21	20	20	6
hsa-miR-27b-3p	hsa-mir-27b	UUCACAGUGGCUAAGUUCUGC	2282	2160	714	1088	120	473	646	621	2454
hsa-miR-27b-5p	hsa-mir-27b	AGAGCUUAGCUGAUUGGUGAAC			3	6	0		7	5	14
hsa-miR-28-3p	hsa-mir-28	CACUAGAUUGUGAGCUCCUGGA	247	179	8	78	27	26	53	36	14
hsa-miR-28-5p	hsa-mir-28	AAGGAGCUCACAGUCUAUUGAG	25		8	16	5	9	3	10	3
hsa-miR-296-3p	hsa-mir-296	GAGGGUUGGGUGGAGGCUCUCC		7	75	56	0	7	3	36	27
hsa-miR-296-5p	hsa-mir-296	AGGGCCCCCCCUCAAUCCUGU	4		4	9	1			7	5
hsa-miR-299-3p	hsa-mir-299	UAUGUGGGAUGGUAAACCGCUU							3
hsa-miR-299-5p	hsa-mir-299	UGGUUUACCGUCCCACAUACAU			0	0					1
hsa-miR-29a-3p	hsa-mir-29a	UAGCACCAUCUGAAAUCGGUUA	11	19	39	17	3	10	57	34	378
hsa-miR-29b-1-5p	hsa-mir-29b-1	GCUGGUUUCAUAUGGUGGUUUAGA			1	1		0			1
hsa-miR-29b-2-5p	hsa-mir-29b-2	CUGGUUUCACAUGGUGGCUUAG			2	1
hsa-miR-29b-3p	hsa-mir-29b-1	UAGCACCAUUUGAAAUCAGUGUU	4	6	2	2	0	2	6	9	17
hsa-miR-29c-3p	hsa-mir-29c	UAGCACCAUUUGAAAUCGGUUA			1						4
hsa-miR-29c-5p	hsa-mir-29c	UGACCGAUUUCUCCUGGUGUUC		12	10	4		2	3	2	5
hsa-miR-301a-3p	hsa-mir-301a	CAGUGCAAUAGUAUUGUCAAAGC			2	1	0	3		2	1
hsa-miR-301a-5p	hsa-mir-301a	GCUCUGACUUUAUUGCACUACU			0	1
hsa-miR-302b-3p	hsa-mir-302b	UAAGUGCUUCCAUGUUUUAGUAG				0
hsa-miR-302d-3p	hsa-mir-302d	UAAGUGCUUCCAUGUUUGAGUGU									1
hsa-miR-3064-5p	hsa-mir-3064	UCUGGCUGUUGUGGUGUGCAA			3	1	0				2
hsa-miR-3065-5p	hsa-mir-3065	UCAACAAAAUCACUGAUGCUGGA				0
hsa-miR-3074-3p	hsa-mir-3074	GAUAUCAGCUCAGUAGGCACCG			0			0
hsa-miR-3074-5p	hsa-mir-3074	GUUCCUGCUGAACUGAGCCAG			0
hsa-miR-30a-3p	hsa-mir-30a	CUUUCAGUCGGAUGUUUGCAGC	70	43	57	48	2	10	33	25	199
hsa-miR-30a-5p	hsa-mir-30a	UGUAAACAUCCUCGACUGGAAG	334	458	3996	4165	109	154	400	338	4747
hsa-miR-30b-3p	hsa-mir-30b	CUGGGAGGUGGAUGUUUACUUC				0
hsa-miR-30b-5p	hsa-mir-30b	UGUAAACAUCCUACACUCAGCU	215	303	1532	598	112	971	422	818	3115
hsa-miR-30c-1-3p	hsa-mir-30c-1	CUGGGAGAGGGUUGUUUACUCC			3	1				4	3
hsa-miR-30c-2-3p	hsa-mir-30c-2	CUGGGAGAAGGCUGUUUACUCU		5	10	13		6	14	2	50
hsa-miR-30c-5p	hsa-mir-30c-2	UGUAAACAUCCUACACUCUCAGC	623	769	5124	1250	109	461	708	411	3454
hsa-miR-30d-3p	hsa-mir-30d	CUUUCAGUCAGAUGUUUGCUGC		5	1	0		2			8
hsa-miR-30d-5p	hsa-mir-30d	UGUAAACAUCCCCGACUGGAAG	1095	1156	5752	5506	3620	2269	687	2070	2309
hsa-miR-30e-3p	hsa-mir-30e	CUUUCAGUCGGAUGUUUACAGC	92	129	62	68	5	16	63	29	174
hsa-miR-30e-5p	hsa-mir-30e	UGUAAACAUCCUUGACUGGAAG	47	43	246	513	403	285	83	653	301
hsa-miR-31-5p	hsa-mir-31	AGGCAAGAUGCUGGCAUAGCU			1				5		2
hsa-miR-3115	hsa-mir-3115	AUAUGGGUUUACUAGUUGGU			0
hsa-miR-3120-3p	hsa-mir-3120	CACAGCAAGUGUAGACAGGCA			0
hsa-miR-3127-5p	hsa-mir-3127	AUCAGGGCUUGUGGAAUGGGAAG					0
hsa-miR-3135a	hsa-mir-3135a	UGCCUAGGCUGAGACUGCAGUG				3	1	9
hsa-miR-3139	hsa-mir-3139	UAGGAGCUCAACAGAUGCCUGUU					0
hsa-miR-3146	hsa-mir-3146	CAUGCUAGGAUAGAAAGAAUGG					0
hsa-miR-3149	hsa-mir-3149	UUUGUAUGGAUAUGUGUGUGUAU					0
hsa-miR-3150b-3p	hsa-mir-3150b	UGAGGAGAUCGUCGAGGUUGG	9				1
hsa-miR-3157-3p	hsa-mir-3157	CUGCCCUAGUCUAGCUGAAGCU				0	0
hsa-miR-3158-3p	hsa-mir-3158-1	AAGGGCUUCCUCUCUGCAGGAC			1	1	4	5	2	10
hsa-miR-3164	hsa-mir-3164	UGUGACUUUAAGGGAAAUGGCG				1	0	1		1
hsa-miR-3165	hsa-mir-3165	AGGUGGAUGCAAUGUGACCUCA					0			3
hsa-miR-3177-3p	hsa-mir-3177	UGCACGGCACUGGGGACACGU			1	0
hsa-miR-3179	hsa-mir-3179-1	AGAAGGGGUGAAAUUUAAACGU					0
hsa-miR-3187-3p	hsa-mir-3187	UUGGCCAUGGGGCUGCGCGG				1	1
hsa-miR-3192-5p	hsa-mir-3192	UCUGGGAGGUUGUAGCAGUGGAA						1
hsa-miR-3194-3p	hsa-mir-3194	AGCUCUGCUGCUCACUGGCAGU					0
hsa-miR-32-5p	hsa-mir-32	UAUUGCACAUUACUAAGUUGCA	9	24	5	31	22	40	7	32	2
hsa-miR-3200-3p	hsa-mir-3200	CACCUUGCGCUACUCAGGUCUG				0	1	1		3
hsa-miR-3200-5p	hsa-mir-3200	AAUCUGAGAAGGCGCACAAGGU					0			4
hsa-miR-320a	hsa-mir-320a	AAAAGCUGGGUUGAGAGGGCGA	6817	5450	2051	2831	3042	5364	569	2134	552
hsa-miR-320b	hsa-mir-320b-1	AAAAGCUGGGUUGAGAGGGCAA			1	1	2	2		1
hsa-miR-320c	hsa-mir-320c-1	AAAAGCUGGGUUGAGAGGGU	11	11	1	1	0	1
hsa-miR-320d	hsa-mir-320d-1	AAAAGCUGGGUUGAGAGGA			1	1	1	3		4
hsa-miR-323a-3p	hsa-mir-323a	CACAUUACACGGUCGACCUCU	31	5	167	112	0		46	3	100
hsa-miR-323a-5p	hsa-mir-323a	AGGUGGUCCGUGGCGCGUUCGC			5	2
hsa-miR-324-3p	hsa-mir-324	ACUGCCCCAGGUGCUGCUGG			1	1	2	1			2
hsa-miR-324-5p	hsa-mir-324	CGCAUCCCCUAGGGCAUUGGUGU				1					1
hsa-miR-326	hsa-mir-326	CCUCUGGGCCCUUCCUCCAG			23	9		1	5		9
hsa-miR-328-3p	hsa-mir-328	CUGGCCCUCUCUGCCCUUCCGU	135	129	1057	692	11	39	163	191	201
hsa-miR-329-3p	hsa-mir-329-1	AACACACCUGGUUAACCUCUUU			1
hsa-miR-330-3p	hsa-mir-330	GCAAAGCACACGGCCUGCAGAGA		5	0	1	1	1
hsa-miR-330-5p	hsa-mir-330	UCUCUGGGCCUGUGUCUUAGGC	9		22	14		6	20	7	58
hsa-miR-331-3p	hsa-mir-331	GCCCCUGGGCCUAUCCUAGAA			0	2	1	1			3
hsa-miR-331-5p	hsa-mir-331	CUAGGUAUGGUCCCAGGGAUCC			2
hsa-miR-335-3p	hsa-mir-335	UUUUUCAUUAUUGCUCCUGACC	3		102	31	1		19	9	29
hsa-miR-335-5p	hsa-mir-335	UCAAGAGCAAUAACGAAAAAUGU			23	38	3	5			19
hsa-miR-337-3p	hsa-mir-337	CUCCUAUAUGAUGCCUUUCUUC					0
hsa-miR-338-5p	hsa-mir-338	AACAAUAUCCUGGUGCUGAGUG			68	56		6	3		11
hsa-miR-339-3p	hsa-mir-339	UGAGCGCCUCGACGACAGAGCCG	13			0		1	3
hsa-miR-339-5p	hsa-mir-339	UCCCUGUCCUCCAGGAGCUCACG	16		3	5	3	4	5		2
hsa-miR-33a-5p	hsa-mir-33a	GUGCAUUGUAGUUGCAUUGCA			3	1					1
hsa-miR-340-3p	hsa-mir-340	UCCGUCUCAGUUACUUUAUAGC	45	24	24	39	5	21	19	4	33
hsa-miR-340-5p	hsa-mir-340	UUAUAAAGCAAUGAGACUGAUU	211	181	979	931	91	107	143	175	1307
hsa-miR-342-3p	hsa-mir-342	UCUCACACAGAAAUCGCACCCGU	16	24	79	139	10	8	23	22	140
hsa-miR-342-5p	hsa-mir-342	AGGGGUGCUAUCUGUGAUUGA	58	81	206	140	34	41	11	16	34
hsa-miR-345-5p	hsa-mir-345	GCUGACUCCUAGUCCAGGGCUC	4	19	1	4	2		4
hsa-miR-34a-5p	hsa-mir-34a	UGGCAGUGUCUUAGCUGGUUGU			22	22	1	0	3	3	15
hsa-miR-34c-5p	hsa-mir-34c	AGGCAGUGUAGUUAGCUGAUUGC	18	10	296	460	1	9	143	19	418
hsa-miR-3607-3p	hsa-mir-3607	ACUGUAAACGCUUUCUGAUG								7
hsa-miR-361-3p	hsa-mir-361	UCCCCCAGGUGUGAUUCUGAUUU	61	50	68	77	13	10	11	5	16
hsa-miR-361-5p	hsa-mir-361	UUAUCAGAAUCUCCAGGGGUAC	18	45	185	101	4	5	26	13	72
hsa-miR-3613-5p	hsa-mir-3613	UGUUGUACUUUUUUUUUUGUUC	13	21	3	8	6	8	4	31
hsa-miR-3614-3p	hsa-mir-3614	UAGCCUUCAGAUCUUGGUGUUUU		5			0
hsa-miR-3615	hsa-mir-3615	UCUCUCGGCUCCUCGCGGCUC		5		1	1	1		4
hsa-miR-362-3p	hsa-mir-362	AACACACCUAUUCAAGGAUUCA					0			2
hsa-miR-362-5p	hsa-mir-362	AAUCCUUGGAACCUAGGUGUGAGU	11	12	2	6	2	13		6
hsa-miR-363-3p	hsa-mir-363	AAUUGCACGGUAUCCAUCUGUA	404	334	75	985	783	2692	86	751	8
hsa-miR-363-5p	hsa-mir-363	CGGGUGGAUCACGAUGCAAUUU			0		0
hsa-miR-3656	hsa-mir-3656	GGCGGGUGCGGGGGUGG					0
hsa-miR-365a-3p	hsa-mir-365a	UAAUGCCCCUAAAAAUCCUUAU		4	1	1	0	1			6
hsa-miR-365a-5p	hsa-mir-365a	AGGGACUUUUGGGGGCAGAUGUG				0					1
hsa-miR-365b-3p	hsa-mir-365b	UAAUGCCCCUAAAAAUCCUUAU		4	1	1	0	1			6
hsa-miR-3682-3p	hsa-mir-3682	UGAUGAUACAGGUGGAGGUAG					0	2
hsa-miR-3686	hsa-mir-3686	AUCUGUAAGAGAAAGUAAAUGA					0
hsa-miR-3688-3p	hsa-mir-3688-1	UAUGGAAAGACUUUGCCACUCU				0	0	0	2	4
hsa-miR-369-3p	hsa-mir-369	AAUAAUACAUGGUUGAUCUUU		12	297	233	1	4	33	11	855
hsa-miR-369-5p	hsa-mir-369	AGAUCGACCGUGUUAUAUUCGC	9		195	104	0	3	56	5	100
hsa-miR-3690	hsa-mir-3690-1	ACCUGGACCCAGCGUAGACAAAG					0
hsa-miR-370-3p	hsa-mir-370	GCCUGCUGGGGUGGAACCUGGU	323	226	1278	1242	21	154	196	926	825
hsa-miR-370-5p	hsa-mir-370	CAGGUCACGUCUCUGCAGUUAC			10	6			3		1
hsa-miR-374a-3p	hsa-mir-374a	CUUAUCAGAUUGUAUUGUAAUU				6	2	13	5	5	1
hsa-miR-374a-5p	hsa-mir-374a	UUAUAAUACAACCUGAUAAGUG	27	10	4	26	15	47	12	29	5
hsa-miR-374b-3p	hsa-mir-374b	CUUAGCAGGUUGUAUUAUCAUU			1	3	1			10	4
hsa-miR-374b-5p	hsa-mir-374b	AUAUAAUACAACCUGCUAAGUG	29	50	11	100	28	83	41	73	22
hsa-miR-375	hsa-mir-375	UUUGUUCGUUCGGCUCGCGUGA	81	41	27	36	1	18	11	16	50
hsa-miR-376a-3p	hsa-mir-376a-1	AUCAUAGAGGAAAAUCCACGU			0	0
hsa-miR-376c-3p	hsa-mir-376c	AACAUAGAGGAAAUUCCACGU				0		2
hsa-miR-377-3p	hsa-mir-377	AUCACACAAAGGCAACUUUUGU			3	0					1
hsa-miR-377-5p	hsa-mir-377	AGAGGUUGCCCUUGGUGAAUUC		12	5	7				7	14
hsa-miR-378a-3p	hsa-mir-378a	ACUGGACUUGGAGUCAGAAGGC	2361	2060	2281	1915	515	580	757	1345	1621
hsa-miR-378a-5p	hsa-mir-378a	CUCCUGACUCCAGGUCCUGUGU	16	12	6	3	1	9	7		4
hsa-miR-378d	hsa-mir-378d-2	ACUGGACUUGGAGUCAGAAA		15	3	1				2	4
hsa-miR-378g	hsa-mir-378g	ACUGGGCUUGGAGUCAGAAG			3	1	0		3		4
hsa-miR-379-3p	hsa-mir-379	UAUGUAACAUGGUCCACUAACU			1						3
hsa-miR-379-5p	hsa-mir-379	UGGUAGACUAUGGAACGUAGG	96	91	1313	851	18	80	1146	227	2449
hsa-miR-381-3p	hsa-mir-381	UAUACAAGGGCAAGCUCUCUGU	539	219	1265	552	14	56	146	228	1467
hsa-miR-382-3p	hsa-mir-382	AAUCAUUCACGGACAACACUU			137	28		2	11	4	96
hsa-miR-382-5p	hsa-mir-382	GAAGUUGUUCGUGGUGGAUUCG	292	174	5619	3034	15	112	378	199	1112
hsa-miR-3909	hsa-mir-3909	UGUCCUCUAGGGCCUGCAGUCU				1
hsa-miR-3911	hsa-mir-3911	UGUGUGGAUCCUGGAGGAGGCA					0
hsa-miR-3912-3p	hsa-mir-3912	UAACGCAUAAUAUGGACAUGU				0	0	2		2
hsa-miR-3913-5p	hsa-mir-3913-1	UUUGGGACUGAUCUUGAUGUCU						1
hsa-miR-3934-5p	hsa-mir-3934	UCAGGUGUGGAAACUGAGGCAG						1
hsa-miR-3936	hsa-mir-3936	UAAGGGGUGUAUGGCAGAUGCA					0
hsa-miR-409-3p	hsa-mir-409	GAAUGUUGCUCGGUGAACCCCU	9	21	211	157	5	13	68	28	74
hsa-miR-409-5p	hsa-mir-409	AGGUUACCCGAGCAACUUUGCAU	4	5	57	25	0	4	30		91
hsa-miR-410-3p	hsa-mir-410	AAUAUAACACAGAUGGCCUGU	20	5	108	98		2	10	18	224
hsa-miR-410-5p	hsa-mir-410	AGGUUGUCUGUGAUGAGUUCG			9	10					1
hsa-miR-411-3p	hsa-mir-411	UAUGUAACACGGUCCACUAACC			1						1
hsa-miR-411-5p	hsa-mir-411	UAGUAGACCGUAUAGCGUACG	20	14	36	30	0	3	34	17	152
hsa-miR-412-5p	hsa-mir-412	UGGUCGACCAGUUGGAAAGUAAU							8
hsa-miR-421	hsa-mir-421	AUCAACAGACAUUAAUUGGGCGC			13	5	1	4			11
hsa-miR-423-3p	hsa-mir-423	AGCUCGGUCUGAGGCCCCUCAGU	222	200	135	156	53	85	78	88	31
hsa-miR-423-5p	hsa-mir-423	UGAGGGGCAGAGAGCGAGACUUU	1757	1330	529	646	484	795	325	496	100
hsa-miR-424-3p	hsa-mir-424	CAAAACGUGAGGCGCUGCUAU		19	1	5	3	4	3	5	1
hsa-miR-424-5p	hsa-mir-424	CAGCAGCAAUUCAUGUUUUGAA					1	2
hsa-miR-425-3p	hsa-mir-425	AUCGGGAAUGUCGUGUCCGCCC		19	8	4		1		2	7
hsa-miR-425-5p	hsa-mir-425	AAUGACACGAUCACUCCCGUUGA	40	41	25	49	80	95	10	70	16
hsa-miR-4286	hsa-mir-4286	ACCCCACUCCUGGUACC				0	0
hsa-miR-429	hsa-mir-429	UAAUACUGUCUGGUAAAACCGU				0			3	4
hsa-miR-431-3p	hsa-mir-431	CAGGUCGUCUUGCAGGGCUUCU			3	1					2
hsa-miR-431-5p	hsa-mir-431	UGUCUUGCAGGCCGUCAUGCA	4		2	1			3		2
hsa-miR-432-5p	hsa-mir-432	UCUUGGAGUAGGUCAUUGGGUGG	83	31	2	1	2	9	5	20	1
hsa-miR-433-3p	hsa-mir-433	AUCAUGAUGGGCUCCUCGGUGU	90	45	2129	831	4	21	97	31	267
hsa-miR-433-5p	hsa-mir-433	UACGGUGAGCCUGUCAUUAUUC			10	5		2	11	3	28
hsa-miR-4433a-5p	hsa-mir-4433a	CGUCCCACCCCCCACUCCUGU						0
hsa-miR-4433b-3p	hsa-mir-4433b	CAGGAGUGGGGGGUGGGACGU			0	1
hsa-miR-4433b-5p	hsa-mir-4433b	AUGUCCCACCCCCACUCCUGU	25	12	1			7
hsa-miR-4438	hsa-mir-4438	CACAGGCUUAGAAAAGACAGU					0
hsa-miR-4443	hsa-mir-4443	UUGGAGGCGUGGGUUUU				0
hsa-miR-4446-3p	hsa-mir-4446	CAGGGCUGGCAGUGACAUGGGU	22	5	1			3			2
hsa-miR-448	hsa-mir-448	UUGCAUAUGUAGGAUGUCCCAU			2	5					1
hsa-miR-4482-5p	hsa-mir-4482	AACCCAGUGGGCUAUGGAAAUG					0
hsa-miR-4488	hsa-mir-4488	AGGGGGCGGGCUCCGGCG					0
hsa-miR-4489	hsa-mir-4489	UGGGGCUAGUGAUGCAGGACG			0	1	0
hsa-miR-4492	hsa-mir-4492	GGGGCUGGGCGCGCGCC	373	465	12	35	0	42	118	11	50
hsa-miR-4497	hsa-mir-4497	CUCCGGGACGGCUGGGC		7
hsa-miR-449a	hsa-mir-449a	UGGCAGUGUAUUGUUAGCUGGU			3	3	1				5
hsa-miR-449c-5p	hsa-mir-449c	UAGGCAGUGUAUUGCUAGCGGCUGU				1	0
hsa-miR-4504	hsa-mir-4504	UGUGACAAUAGAGAUGAACAUG	9			1	3	6		10
hsa-miR-4508	hsa-mir-4508	GCGGGGCUGGGCGCGCG	182	95	6	25	1	24	37	5	9
hsa-miR-450a-2-3p	hsa-mir-450a-2	AUUGGGGACAUUUUGCAUUCAU								2
hsa-miR-450a-5p	hsa-mir-450a-1	UUUUGCGAUGUGUUCCUAAUAU		8	3	3	1	1	11		2
hsa-miR-450b-5p	hsa-mir-450b	UUUUGCAAUAUGUUCCUGAAUA	16	17	0	3	1	1	3	4	2
hsa-miR-451a	hsa-mir-451a	AAACCGUUACCAUUACUGAGUU	251	203	655	1650	5116	4871	1329	16693	193
hsa-miR-452-5p	hsa-mir-452	AACUGUUUGCAGAGGAAACUGA	11		1	0	1
hsa-miR-454-3p	hsa-mir-454	UAGUGCAAUAUUGCUUAUAGGGU			1	9	3	19		9
hsa-miR-454-5p	hsa-mir-454	ACCCUAUCAAUAUUGUCUCUGC		14			0
hsa-miR-455-5p	hsa-mir-455	UAUGUGCCUUUGGACUACAUCG			13	10			7		12
hsa-miR-4637	hsa-mir-4637	UACUAACUGCAGAUUCAAGUGA				1	2
hsa-miR-4639-5p	hsa-mir-4639	UUGCUAAGUAGGCUGAGAUUGA					0			2
hsa-miR-4645-3p	hsa-mir-4645	AGACAGUAGUUCUUGCCUGGUU				0	0
hsa-miR-4659a-3p	hsa-mir-4659a	UUUCUUCUUAGACAUGGCAACG					1	3
hsa-miR-4659b-3p	hsa-mir-4659b	UUUCUUCUUAGACAUGGCAGCU			0			2
hsa-miR-4659b-5p	hsa-mir-4659b	UUGCCAUGUCUAAGAAGAA						1
hsa-miR-4660	hsa-mir-4660	UGCAGCUCUGGUGGAAAAUGGAG					0
hsa-miR-4664-3p	hsa-mir-4664	CUUCCGGUCUGUGAGCCCCGUC						1
hsa-miR-4665-5p	hsa-mir-4665	CUGGGGGACGCGUGAGCGCGAGC								5
hsa-miR-4668-5p	hsa-mir-4668	AGGGAAAAAAAAAAGGAUUUGUC			0
hsa-miR-4672	hsa-mir-4672	UUACACAGCUGGACAGAGGCA					1
hsa-miR-4676-5p	hsa-mir-4676	GAGCCAGUGGUGAGACAGUGA			0
hsa-miR-4677-3p	hsa-mir-4677	UCUGUGAGACCAAAGAACUACU				1	1	1
hsa-miR-4685-3p	hsa-mir-4685	UCUCCCUUCCUGCCCUGGCUAG					0
hsa-miR-4690-3p	hsa-mir-4690	GCAGCCCAGCUGAGGCCUCUG				0
hsa-miR-4717-3p	hsa-mir-4717	ACACAUGGGUGGCUGUGGCCU					1
hsa-miR-4724-5p	hsa-mir-4724	AACUGAACCAGGAGUGAGCUUCG				0
hsa-miR-4732-3p	hsa-mir-4732	GCCCUGACCUGUCCUGUUCUG			1	1	6	2
hsa-miR-4732-5p	hsa-mir-4732	UGUAGAGCAGGGAGCAGGAAGCU		19	4	9	21	37	8	14
hsa-miR-4742-5p	hsa-mir-4742	UCAGGCAAAGGGAUAUUUACAGA				1		1
hsa-miR-4746-5p	hsa-mir-4746	CCGGUCCCAGGAGAACCUGCAGA			0
hsa-miR-4747-5p	hsa-mir-4747	AGGGAAGGAGGCUUGGUCUUAG			0
hsa-miR-4754	hsa-mir-4754	AUGCGGACCUGGGUUAGCGGAGU						2
hsa-miR-4755-3p	hsa-mir-4755	AGCCAGGCUCUGAAGGGAAAGU					0	2
hsa-miR-4755-5p	hsa-mir-4755	UUUCCCUUCAGAGCCUGGCUUU			0
hsa-miR-4762-3p	hsa-mir-4762	CUUCUGAUCAAGAUUUGUGGUG					1	2
hsa-miR-4772-3p	hsa-mir-4772	CCUGCAACUUUGCCUGAUCAGA	9		0					3
hsa-miR-4772-5p	hsa-mir-4772	UGAUCAGGCAAAAUUGCAGACU			1		0			2
hsa-miR-4775	hsa-mir-4775	UUAAUUUUUUGUUUCGGUCACU					0	1
hsa-miR-4791	hsa-mir-4791	UGGAUAUGAUGACUGAAA				0
hsa-miR-4792	hsa-mir-4792	CGGUGAGCGCUCGCUGGC		12
hsa-miR-4796-5p	hsa-mir-4796	UGUCUAUACUCUGUCACUUUAC					0
hsa-miR-4802-3p	hsa-mir-4802	UACAUGGAUGGAAACCUUCAAGC				1	1
hsa-miR-483-5p	hsa-mir-483	AAGACGGGAGGAAAGAAGGGAG	58	45	2	2	2	9		2	1
hsa-miR-484	hsa-mir-484	UCAGGCUCAGUCCCCUCCCGAU	43	81	102	114	70	33	44	16	17
hsa-miR-485-3p	hsa-mir-485	GUCAUACACGGCUCUCCUCUCU			4	2			3		6
hsa-miR-485-5p	hsa-mir-485	AGAGGCUGGCCGUGAUGAAUUC	16	5	164	95	0	7	76	30	142
hsa-miR-486-3p	hsa-mir-486-1	CGGGGCAGCUCAGUACAGGAU	70	42	26	29	46	81	22	57	4
hsa-miR-486-5p	hsa-mir-486-1	UCCUGUACUGAGCUGCCCCGAG	4908	4920	4436	5087	21934	11297	4482	18387	282
hsa-miR-487a-3p	hsa-mir-487a	AAUCAUACAGGGACAUCCAGUU							3
hsa-miR-487b-3p	hsa-mir-487b	AAUCGUACAGGGUCAUCCACUU	20	12	60	25		3	26	3	69
hsa-miR-490-3p	hsa-mir-490	CAACCUGGAGGACUCCAUGCUG			30	15	1	1		1	22
hsa-miR-490-5p	hsa-mir-490	CCAUGGAUCUCCAGGUGGGU			11	5		1		2	7
hsa-miR-491-3p	hsa-mir-491	CUUAUGCAAGAUUCCCUUCUAC				0
hsa-miR-491-5p	hsa-mir-491	AGUGGGGAACCCUUCCAUGAGG			4	3	1			5	12
hsa-miR-493-3p	hsa-mir-493	UGAAGGUCUACUGUGUGCCAGG	4	50	1	2	3	11	27	19	14
hsa-miR-493-5p	hsa-mir-493	UUGUACAUGGUAGGCUUUCAUU	22	36	47	27	5	10	54	29	23
hsa-miR-494-3p	hsa-mir-494	UGAAACAUACACGGGAAACCUC			1	1			3
hsa-miR-494-5p	hsa-mir-494	AGGUUGUCCGUGUUGUCUUCUCU									1
hsa-miR-495-3p	hsa-mir-495	AAACAAACAUGGUGCACUUCUU	38	19	820	279	2	3	39	5	333
hsa-miR-496	hsa-mir-496	UGAGUAUUACAUGGCCAAUCUC			1	0					1
hsa-miR-497-5p	hsa-mir-497	CAGCAGCACACUGUGGUUUGU			2	3		1			4
hsa-miR-4999-5p	hsa-mir-4999	UGCUGUAUUGUCAGGUAGUGA					1
hsa-miR-499a-5p	hsa-mir-499a	UUAAGACUUGCAGUGAUGUUU	240	310	24	22	14	71	17	66	21
hsa-miR-5000-3p	hsa-mir-5000	UCAGGACACUUCUGAACUUGGA						1
hsa-miR-5009-5p	hsa-mir-5009	UUGGACUUUUUCAGAUUUGGGGAU			0
hsa-miR-500a-3p	hsa-mir-500a	AUGCACCUGGGCAAGGAUUCUG			2	4	3	1		2
hsa-miR-500a-5p	hsa-mir-500a	UAAUCCUUGCUACCUGGGUGAGA					1	1
hsa-miR-501-3p	hsa-mir-501	AAUGCACCCGGGCAAGGAUUCU		21	5	13	10	7	7	20	1
hsa-miR-501-5p	hsa-mir-501	AAUCCUUUGUCCCUGGGUGAGA				1	1	2
hsa-miR-5010-3p	hsa-mir-5010	UUUUGUGUCUCCCAUUCCCCAG				1	0
hsa-miR-5010-5p	hsa-mir-5010	AGGGGGAUGGCAGAGCAAAAUU					1	1
hsa-miR-502-3p	hsa-mir-502	AAUGCACCUGGGCAAGGAUUCA	11	12	6	27	38	50	7	90
hsa-miR-504-5p	hsa-mir-504	AGACCCUGGUCUGCACUCUAUC				1					2
hsa-miR-505-3p	hsa-mir-505	CGUCAACACUUGCUGGUUUCCU				0	2		5	5
hsa-miR-505-5p	hsa-mir-505	GGGAGCCAGGAAGUAUUGAUGU			4	2	2	1			2
hsa-miR-5090	hsa-mir-5090	CCGGGGCAGAUUGGUGUAGGGUG						1
hsa-miR-511-5p	hsa-mir-511	GUGUCUUUUGCUCUGCAGUCA		14		9	4
hsa-miR-514a-3p	hsa-mir-514a-1	AUUGACACUUCUGUGAGUAGA					0
hsa-miR-5187-5p	hsa-mir-5187	UGGGAUGAGGGAUUGAAGUGGA				0	0
hsa-miR-532-3p	hsa-mir-532	CCUCCCACACCCAAGGCUUGCA	7		2	14	2	4		4	1
hsa-miR-532-5p	hsa-mir-532	CAUGCCUUGAGUGUAGGACCGU	126	105	185	209	95	109	44	219	123
hsa-miR-539-3p	hsa-mir-539	AUCAUACAAGGACAAUUUCUUU					0
hsa-miR-539-5p	hsa-mir-539	GGAGAAAUUAUCCUUGGUGUGU			5	3			5		1
hsa-miR-542-3p	hsa-mir-542	UGUGACAGAUUGAUAACUGAAA			2	3	2	1	12		4
hsa-miR-543	hsa-mir-543	AAACAUUCGCGGUGCACUUCUU	54	31	424	77	2	10	22	13	47
hsa-miR-545-3p	hsa-mir-545	UCAGCAAACAUUUAUUGUGUGC				0	0	1
hsa-miR-548a-3p	hsa-mir-548a-1	CAAAACUGGCAAUUACUUUUGC				0	0
hsa-miR-548ad-5p	hsa-mir-548ad	AAAAGUAAUUGUGGUUUUUG	5		2	6	21	11	3	38
hsa-miR-548ae-5p	hsa-mir-548ae-2	AAAAGUAAUUGUGGUUUUUG	5		2	6	21	11	3	38
hsa-miR-548an	hsa-mir-548an	AAAAGGCAUUGUGGUUUUUG					0	2
hsa-miR-548ar-3p	hsa-mir-548ar	UAAAACUGCAGUUAUUUUUGC			0	1	1			13
hsa-miR-548at-5p	hsa-mir-548at	AAAAGUUAUUGCGGUUUUGGCU								3
hsa-miR-548ay-3p	hsa-mir-548ay	CAAAACCGCGAUUACUCUUGCA						1
hsa-miR-548ay-5p	hsa-mir-548ay	AAAAGUAAUUGUGGUUUUUGC			2	1	6	3		12
hsa-miR-548d-5p	hsa-mir-548d-1	AAAAGUAAUUGUGGUUUUUGCC			0	0	1	1		2
hsa-miR-548e-3p	hsa-mir-548e	AAAAACUGAGACUACUUUUGCA	11		3	5	5	7		27
hsa-miR-548j-3p	hsa-mir-548j	CAAAAACUGCAUUACUUUUGC			0
hsa-miR-548j-5p	hsa-mir-548j	AAAAGUAAUUGCGGUCUUUGGU			3	0	3	4		3
hsa-miR-548k	hsa-mir-548k	AAAAGUACUUGCGGAUUUUGCU			1	1	2	6		9
hsa-miR-548o-3p	hsa-mir-548o	CCAAAACUGCAGUUACUUUUGC		4	0	1	1			4
hsa-miR-548u	hsa-mir-548u	CAAAGACUGCAAUUACUUUUGCG				0				3
hsa-miR-550a-3-5p	hsa-mir-550a-3	AGUGCCUGAGGGAGUAAGAG					0	1
hsa-miR-551b-3p	hsa-mir-551b	GCGACCCAUACUUGGUUUCAG			0
hsa-miR-5582-3p	hsa-mir-5582	UAAAACUUUAAGUGUGCCUAGG						1
hsa-miR-5587-3p	hsa-mir-5587	GCCCCGGGCAGUGUGAUCAUC				0
hsa-miR-5695	hsa-mir-5695	ACUCCAAGAAGAAUCUAGACAG						1		2
hsa-miR-574-3p	hsa-mir-574	CACGCUCAUGCACACACCCACA	11	21	2	7	2		5	8	4
hsa-miR-574-5p	hsa-mir-574	UGAGUGUGUGUGUGUGAGUGUGU	9	17	4	2	2	4	5	3	1
hsa-miR-576-3p	hsa-mir-576	AAGAUGUGGAAAAAUUGGAAUC		5	5	3	5	8		38	2
hsa-miR-576-5p	hsa-mir-576	AUUCUAAUUUCUCCACGUCUUU	7	21	0	3	8	4	3
hsa-miR-579-3p	hsa-mir-579	UUCAUUUGGUAUAAACCGCGAUU								2
hsa-miR-579-5p	hsa-mir-579	UCGCGGUUUGUGCCAGAUGACG					1	1		3
hsa-miR-580-3p	hsa-mir-580	UUGAGAAUGAUGAAUCAUUAGG				1				2
hsa-miR-581	hsa-mir-581	UCUUGUGUUCUCUAGAUCAGU			0	2	1	3
hsa-miR-582-3p	hsa-mir-582	UAACUGGUUGAACAACUGAACC	20		1	1	0	2	2
hsa-miR-582-5p	hsa-mir-582	UUACAGUUGUUCAACCAGUUACU		5
hsa-miR-584-3p	hsa-mir-584	UCAGUUCCAGGCCAACCAGGCU					0
hsa-miR-584-5p	hsa-mir-584	UUAUGGUUUGCCUGGGACUGAG	18		3	6	20	13	7	15	1
hsa-miR-589-5p	hsa-mir-589	UGAGAACCACGUCUGCUCUGAG		5	1	2	3	2
hsa-miR-590-3p	hsa-mir-590	UAAUUUUAUGUAUAAGCUAGU			0	8	2	8	2	9
hsa-miR-590-5p	hsa-mir-590	GAGCUUAUUCAUAAAAGUGCAG			0	0
hsa-miR-592	hsa-mir-592	UUGUGUCAAUAUGCGAUGAUGU			139	89			4	4	41
hsa-miR-598-3p	hsa-mir-598	UACGUCAUCGUUGUCAUCGUCA			0		1		3
hsa-miR-6087	hsa-mir-6087	UGAGGCGGGGGGGCGAGC	85	24	1	1		6	24		3
hsa-miR-610	hsa-mir-610	UGAGCUAAAUGUGUGCUGGGA				1	0	0
hsa-miR-615-3p	hsa-mir-615	UCCGAGCCUGGGUCUCCCUCUU			0					2
hsa-miR-618	hsa-mir-618	AAACUCUACUUGUCCUUCUGAGU				2	1		4	2
hsa-miR-624-5p	hsa-mir-624	UAGUACCAGUACCUUGUGUUCA			0	1	1
hsa-miR-625-3p	hsa-mir-625	GACUAUAGAACUUUCCCCCUCA				2	1	1		1
hsa-miR-625-5p	hsa-mir-625	AGGGGGAAAGUUCUAUAGUCC			2	1	1	1		2
hsa-miR-627-3p	hsa-mir-627	UCUUUUCUUUGAGACUCACU			0	0	0
hsa-miR-627-5p	hsa-mir-627	GUGAGUCUCUAAGAAAAGAGGA					0
hsa-miR-628-3p	hsa-mir-628	UCUAGUAAGAGUGGCAGUCGA			1	1	2	5		2
hsa-miR-628-5p	hsa-mir-628	AUGCUGACAUAUUUACUAGAGG	4		0	1	1	2		2
hsa-miR-629-3p	hsa-mir-629	GUUCUCCCAACGUAAGCCCAGC					0	1
hsa-miR-629-5p	hsa-mir-629	UGGGUUUACGUUGGGAGAACU	67	24	73	31	79	45	79	207	2
hsa-miR-642a-3p	hsa-mir-642a	AGACACAUUUGGAGAGGGAACC			1
hsa-miR-642a-5p	hsa-mir-642a	GUCCCUCUCCAAAUGUGUCUUG					0
hsa-miR-6502-5p	hsa-mir-6502	AGCUCUAGAAAGAUUGUUGACC				0
hsa-miR-6503-3p	hsa-mir-6503	GGGACUAGGAUGCAGACCUCC				1
hsa-miR-651-5p	hsa-mir-651	UUUAGGAUAAGCUUGACUUUUG			1	1	7	4	4	11
hsa-miR-6513-3p	hsa-mir-6513	UCAAGUGUCAUCUGUCCCUAG					1	1
hsa-miR-6515-5p	hsa-mir-6515	UUGGAGGGUGUGGAAGACAUC			0
hsa-miR-6516-3p	hsa-mir-6516	AUCAUGUAUGAUACUGCAAACA				1	0
hsa-miR-6516-5p	hsa-mir-6516	UUUGCAGUAACAGGUGUGAGCA						2
hsa-miR-652-3p	hsa-mir-652	AAUGGCGCCACUAGGGUUGUG	105	48	140	256	258	455	39	296	89
hsa-miR-654-5p	hsa-mir-654	UGGUGGGCCGCAGAACAUGUGC	25	31	4	4	1		3	5	2
hsa-miR-655-3p	hsa-mir-655	AUAAUACAUGGUUAACCUCUUU				0
hsa-miR-656-3p	hsa-mir-656	AAUAUUAUACAGUCAACCUCU		17	0	0			3
hsa-miR-659-5p	hsa-mir-659	AGGACCUUCCCUGAACCAAGGA			1	1	1	0
hsa-miR-660-5p	hsa-mir-660	UACCCAUUGCAUAUCGGAGUUG			2	10	24	13	8	59
hsa-miR-664a-3p	hsa-mir-664a	UAUUCAUUUAUCCCCAGCCUACA	13			3	1			3	2
hsa-miR-664b-3p	hsa-mir-664b	UUCAUUUGCCUCCCAGCCUACA						2
hsa-miR-668-3p	hsa-mir-668	UGUCACUCGGCUCGGCCCACUAC			16	8		1			1
hsa-miR-671-3p	hsa-mir-671	UCCGGUUCUCAGGGCUCCACC			6	5	0			2	1
hsa-miR-671-5p	hsa-mir-671	AGGAAGCCCUGGAGGGGCUGGAG		10		1	0			3	1
hsa-miR-6721-5p	hsa-mir-6721	UGGGCAGGGGCUUAUUGUAGGAG				1
hsa-miR-6733-5p	hsa-mir-6733	UGGGAAAGACAAACUCAGAGUU					0
hsa-miR-6734-5p	hsa-mir-6734	UUGAGGGGAGAAUGAGGUGGAGA						0
hsa-miR-6740-5p	hsa-mir-6740	AGUUUGGGAUGGAGAGAGGAGA					0
hsa-miR-6741-5p	hsa-mir-6741	GUGGGUGCUGGUGGGAGCCGUG					1
hsa-miR-6742-3p	hsa-mir-6742	ACCUGGGUUGUCCCCUCUAG				1
hsa-miR-6747-3p	hsa-mir-6747	UCCUGCCUUCCUCUGCACCAG						1
hsa-miR-6750-5p	hsa-mir-6750	CAGGGAACAGCUGGGUGAGCUGCU						2
hsa-miR-6764-5p	hsa-mir-6764	UCCCAGGGUCUGGUCAGAGUUG			0
hsa-miR-6767-5p	hsa-mir-6767	UCGCAGACAGGGACACAUGGAGA					1
hsa-miR-6775-3p	hsa-mir-6775	AGGCCCUGUCCUCUGCCCCAG			0		0
hsa-miR-6780a-5p	hsa-mir-6780a	UUGGGAGGGAAGACAGCUGGAGA				0	0
hsa-miR-6783-3p	hsa-mir-6783	UUCCUGGGCUUCUCCUCUGUAG					0
hsa-miR-6783-5p	hsa-mir-6783	UAGGGGAAAAGUCCUGAUCCGG			0		0
hsa-miR-6804-5p	hsa-mir-6804	UGAGGGUGUCAGCAGGUGACG					0
hsa-miR-6805-5p	hsa-mir-6805	UAGGGGGCGGCUUGUGGAGUGU					0			2
hsa-miR-6806-3p	hsa-mir-6806	UGAAGCUCUGACAUUCCUGCAG				0		1
hsa-miR-6807-5p	hsa-mir-6807	GUGAGCCAGUGGAAUGGAGAGG						1
hsa-miR-6820-3p	hsa-mir-6820	UGUGACUUCUCCCCUGCCACAG			0
hsa-miR-6842-3p	hsa-mir-6842	UUGGCUGGUCUCUGCUCCGCAG		20	1	1	1	1		3
hsa-miR-6842-5p	hsa-mir-6842	UGGGGGUGGUCUCUAGCCAAGG					1
hsa-miR-6847-5p	hsa-mir-6847	ACAGAGGACAGUGGAGUGUGAGC				1
hsa-miR-6850-5p	hsa-mir-6850	GUGCGGAACGCUGGCCGGGGCG						2
hsa-miR-6852-5p	hsa-mir-6852	CCCUGGGGUUCUGAGGACAUG	31			0		2			1
hsa-miR-6868-3p	hsa-mir-6868	UUCCUUCUGUUGUCUGUGCAG					0
hsa-miR-6881-3p	hsa-mir-6881	AUCCUCUUUCGUCCUUCCCACU					0
hsa-miR-6882-5p	hsa-mir-6882	UACAAGUCAGGAGCUGAAGCAG					0
hsa-miR-6884-5p	hsa-mir-6884	AGAGGCUGAGAAGGUGAUGUUG			0		1	2		5
hsa-miR-7-1-3p	hsa-mir-7-1	CAACAAAUCACAGUCUGCCAUA			4	3	1	1			3
hsa-miR-7-5p	hsa-mir-7-1	UGGAAGACUAGUGAUUUUGUUGU	79	79	6638	2377	291	264	1774	393	874
hsa-miR-708-3p	hsa-mir-708	CAACUAGACUGUGAGCUUCUAG	18		155	93			16	5	214
hsa-miR-708-5p	hsa-mir-708	AAGGAGCUUACAAUCUAGCUGGG		10	437	310	11	23	229	150	992
hsa-miR-7152-3p	hsa-mir-7152	UCUGGUCCUGGACAGGAGGC	4
hsa-miR-744-3p	hsa-mir-744	CUGUUGCCACUAACCUCAACCU			3	1					1
hsa-miR-744-5p	hsa-mir-744	UGCGGGGCUAGGGCUAACAGCA	85	86	693	241	14	105	127	107	178
hsa-miR-758-3p	hsa-mir-758	UUUGUGACCUGGUCCACUAACC			38	13		4	12	3	18
hsa-miR-760	hsa-mir-760	CGGCUCUGGGUCUGUGGGGA	16	7	53	48	0	1	10		5
hsa-miR-765	hsa-mir-765	UGGAGGAGAAGGAAGGUGAUG					0
hsa-miR-766-5p	hsa-mir-766	AGGAGGAAUUGGUGCUGGUCUU			0
hsa-miR-769-5p	hsa-mir-769	UGAGACCUCUGGGUUCUGAGCU	7	5	1	3	3	1	3	5	1
hsa-miR-7706	hsa-mir-7706	UGAAGCGCCUGUGCUCUGCCGAGA				1	0	1
hsa-miR-7851-3p	hsa-mir-7851	UACCUGGGAGACUGAGGUUGGA					0
hsa-miR-7854-3p	hsa-mir-7854	UGAGGUGACCGCAGAUGGGAA			1	1	1
hsa-miR-7974	hsa-mir-7974	AGGCUGUGAUGCUCUCCUGAGCCC	4
hsa-miR-7976	hsa-mir-7976	UGCCCUGAGACUUUUGCUC			0		1	2
hsa-miR-873-3p	hsa-mir-873	GGAGACUGAUGAGUUCCCGGGA									1
hsa-miR-873-5p	hsa-mir-873	GCAGGAACUUGUGAGUCUCCU			2	1					4
hsa-miR-874-3p	hsa-mir-874	CUGCCCUGGCCCGAGGGACCGA	9		18	15	1	3	3	12	10
hsa-miR-877-3p	hsa-mir-877	UCCUCUUCUCCCUCCUCCCAG			0
hsa-miR-877-5p	hsa-mir-877	GUAGAGGAGAUGGCGCAGGG			1	1	0
hsa-miR-885-5p	hsa-mir-885	UCCAUUACACUACCCUGCCUCU	4	5	0			3
hsa-miR-889-3p	hsa-mir-889	UUAAUAUCGGACAACCAUUGU			1	1	2	1	18	5	4
hsa-miR-891a-5p	hsa-mir-891a	UGCAACGAACCUGAGCCACUGA					0
hsa-miR-9-3p	hsa-mir-9-1	AUAAAGCUAGAUAACCGAAAGU	10	10	1221	1138	2	11	104	22	1377
hsa-miR-9-5p	hsa-mir-9-1	UCUUUGGUUAUCUAGCUGUAUGA	871	398	2090	3678	51	207	8217	686	16398
hsa-miR-92a-1-5p	hsa-mir-92a-1	AGGUUGGGAUCGGUUGCAAUGCU				0				4
hsa-miR-92a-3p	hsa-mir-92a-1	UAUUGCACUUGUCCCGGCCUGU	1056	991	338	628	1058	507	633	3767	129
hsa-miR-92b-3p	hsa-mir-92b	UAUUGCACUCGUCCCGGCCUCC	7		109	93	2	5	24	6	38
hsa-miR-92b-5p	hsa-mir-92b	AGGGACGGGACGCGGUGCAGUG			0	1		1
hsa-miR-93-3p	hsa-mir-93	ACUGCUGAGCUAGCACUUCCCG	4		3	2	1	4		7
hsa-miR-93-5p	hsa-mir-93	CAAAGUGCUGUUCGUGCAGGUAG	339	367	288	914	966	1459	450	2152	238
hsa-miR-935	hsa-mir-935	CCAGUUACCGCUUCCGCUACCGC			0	1					1
hsa-miR-939-5p	hsa-mir-939	UGGGGAGCUGAGGCUCUGGGGGUG				0	1	0
hsa-miR-941	hsa-mir-941-1	CACCCGGCUGUGUGCACAUGUGC		15	1	2	1	2	3		1
hsa-miR-942-5p	hsa-mir-942	UCUUCUCUGUUUUGGCCAUGUG				1	2	10
hsa-miR-95-3p	hsa-mir-95	UUCAACGGGUAUUUAUUGAGCA	4	7		0	1	7		3
hsa-miR-96-5p	hsa-mir-96	UUUGGCACUAGCACAUUUUUGCU	20	12	36	49	23	46	3	101	177
hsa-miR-98-3p	hsa-mir-98	CUAUACAACUUACUACUUUCCC			0
hsa-miR-98-5p	hsa-mir-98	UGAGGUAGUAAGUUGUAUUGUU	89	62	107	137	51	209	167	82	620
hsa-miR-99a-5p	hsa-mir-99a	AACCCGUAGAUCCGAUCUUGUG	1003	1254	2312	1103	71	368	580	362	1547
hsa-miR-99b-3p	hsa-mir-99b	CAAGCUCGUGUCUGUGGGUCCG	13	14	177	94	2	3	22	15	22
hsa-miR-99b-5p	hsa-mir-99b	CACCCGUAGAACCGACCUUGCG	438	305	1965	1290	33	73	684	236	1160
hsa-miR-novel-chr10_1053	hsa-mir-novel-chr10_1053	ACUGGAGCUGAAGGUGCUGUGCU				1		1
hsa-miR-novel-chr10_1129	hsa-mir-novel-chr10_1129	UUCGCAAACUCGUGCCUGGCU						1
hsa-miR-novel-chr10_1232	hsa-mir-novel-chr10_1232	GGUGCUUGGCUGAGGGGC							4		3
hsa-miR-novel-chr10_1290	hsa-mir-novel-chr10_1290	AAAACCUCCCACACCUCC						1
hsa-miR-novel-chr10_1331	hsa-mir-novel-chr10_1331	ACCUGAAAGUGAUCUGUGAUCC						1
hsa-miR-novel-chr10_1393	hsa-mir-novel-chr10_1393	UUUGGAGUUGUAGUGAAAGU		14
hsa-miR-novel-chr10_1450	hsa-mir-novel-chr10_1450	UCUGGCUGCUAUGGCCCCCUCC			2						1
hsa-miR-novel-chr10_1518	hsa-mir-novel-chr10_1518	AGGGAGACAGGGAGACGG						1
hsa-miR-novel-chr10_1618	hsa-mir-novel-chr10_1618	UGAGCCGGCUGAGCAGGAAGCG					1
hsa-miR-novel-chr10_1703	hsa-mir-novel-chr10_1703	UUCCUAUGCAUAUACUUCUUU						1
hsa-miR-novel-chr10_1711	hsa-mir-novel-chr10_1711	UGUGCAGCAGGCCAACCGAGAA								3
hsa-miR-novel-chr10_218	hsa-mir-novel-chr10_218	CGCGGGUGCUUACUGACC				4	6	3
hsa-miR-novel-chr10_251	hsa-mir-novel-chr10_251	UUCUGCCCAGUGCUCUG	50	19	1	11	3	3	322	23	70
hsa-miR-novel-chr10_252	hsa-mir-novel-chr10_252	UUCUGCCCAGUGCUCUG	50	19	1	11	3	3	322	23	70
hsa-miR-novel-chr10_266	hsa-mir-novel-chr10_266	CUCACUUUGUAGACCAGGCUG	11								1
hsa-miR-novel-chr10_535	hsa-mir-novel-chr10_535	UACCCAGAGGAAAGGACA		5
hsa-miR-novel-chr10_54	hsa-mir-novel-chr10_54	UUAAUAUGUACUGACAAAGCG					0	3
hsa-miR-novel-chr10_554	hsa-mir-novel-chr10_554	AGAUUGAUUGAUGGCUCUGUGG					1
hsa-miR-novel-chr10_602	hsa-mir-novel-chr10_602	GCGGCUGGACGAGGCGC	2594	4022	4	11	0	24	118	54	92
hsa-miR-novel-chr10_804	hsa-mir-novel-chr10_804	GAGAGAGGGCAGAGAAGC						1
hsa-miR-novel-chr10_818	hsa-mir-novel-chr10_818	AGAAAGCUCUGGAGCAGC			0	1
hsa-miR-novel-chr10_868	hsa-mir-novel-chr10_868	UGGAGAACAGCUGAGGC						1
hsa-miR-novel-chr10_884	hsa-mir-novel-chr10_884	UCUGCUGUGCUCUCCUCC				1
hsa-miR-novel-chr10_979	hsa-mir-novel-chr10_979	AGAUGAGAUCUCACUGGG	7				0	3		3
hsa-miR-novel-chr11_1752	hsa-mir-novel-chr11_1752	AUGAGUGGAGACGGGCCUGGGUC						1
hsa-miR-novel-chr11_1785	hsa-mir-novel-chr11_1785	GCGGGCGUGGGGGUGGGUGC	9
hsa-miR-novel-chr11_1787	hsa-mir-novel-chr11_1787	AUAAGACAUGGGGAGCU	1017	184	13	15	8	9	8	46	19
hsa-miR-novel-chr11_1898	hsa-mir-novel-chr11_1898	CUCGUCUGAUCUCGGAAG	247	253	14	28	15	192	412	63	1300
hsa-miR-novel-chr11_1915	hsa-mir-novel-chr11_1915	GGGAGGCCUGUUAGGAGG				1
hsa-miR-novel-chr11_1941	hsa-mir-novel-chr11_1941	AUUUGCUGUUAAGAUAUGGGAU			0		1		3
hsa-miR-novel-chr11_1945	hsa-mir-novel-chr11_1945	AUGACAAUGGGAAGCAAGGC						1
hsa-miR-novel-chr11_2034	hsa-mir-novel-chr11_2034	AACAUGUUUCUGAGCUCU					2
hsa-miR-novel-chr11_2090	hsa-mir-novel-chr11_2090	CGAGAAGGAGUUGCUGACC						1
hsa-miR-novel-chr11_2152	hsa-mir-novel-chr11_2152	CCUGCCUGGAGCACUGUCC	16
hsa-miR-novel-chr11_2191	hsa-mir-novel-chr11_2191	GUUUUCUCAGGUUUUGCUUUUUG						1
hsa-miR-novel-chr11_2256	hsa-mir-novel-chr11_2256	UCCUGGGGGUGGGACGGCUGAGG						1
hsa-miR-novel-chr11_2272	hsa-mir-novel-chr11_2272	AAAAGUACUUGCGGAUUUUG			1	3	7	3		3
hsa-miR-novel-chr11_2285	hsa-mir-novel-chr11_2285	UUUGGGGUUGUAGGGCUG						2
hsa-miR-novel-chr11_2291	hsa-mir-novel-chr11_2291	AUGGCACUGGGCAAGUUC						1
hsa-miR-novel-chr11_2305	hsa-mir-novel-chr11_2305	GGGUCACUGUGUGUUGGGA						1
hsa-miR-novel-chr11_2471	hsa-mir-novel-chr11_2471	AUUCGCUGGGAAUUCAGCCUCU					1	1
hsa-miR-novel-chr11_2700	hsa-mir-novel-chr11_2700	CUGUGCGUGUGACAGCGGCUGA	48	27	62	312	122	69	75	244	60
hsa-miR-novel-chr11_2858	hsa-mir-novel-chr11_2858	UCUGGCUGAGGAGGAAGUGGA					1	3
hsa-miR-novel-chr11_3002	hsa-mir-novel-chr11_3002	AAGGGCAGCACUGACACA	7	55	0	1	2
hsa-miR-novel-chr11_3126	hsa-mir-novel-chr11_3126	AGGGCCUUGAGGGGAAGCUGAAGGG			0	1
hsa-miR-novel-chr11_3284	hsa-mir-novel-chr11_3284	UGGAGGGUGUUUCUGAGACAGU				1
hsa-miR-novel-chr11_3489	hsa-mir-novel-chr11_3489	AGCUUGACUCUAGUCUG	47	14	2	7	5	11	2083	98	193
hsa-miR-novel-chr11_3690	hsa-mir-novel-chr11_3690	GGAUGUGCUGAUGGAGUC			0	0	1	4
hsa-miR-novel-chr12_3707	hsa-mir-novel-chr12_3707	GAGGAGUGAGGAGUGGGGA						2
hsa-miR-novel-chr12_3715	hsa-mir-novel-chr12_3715	AGGCAUUAGAUUCUCAUAAGGA				2	1	16		11
hsa-miR-novel-chr12_3797	hsa-mir-novel-chr12_3797	CCAGGAGGAGAGUGUGGAGUCC						1
hsa-miR-novel-chr12_3913	hsa-mir-novel-chr12_3913	AACGUACUAAGAAUAAAUUU				1				3
hsa-miR-novel-chr12_3997	hsa-mir-novel-chr12_3997	AGGGCCCUGGGGAGGAGC	18	5
hsa-miR-novel-chr12_4046	hsa-mir-novel-chr12_4046	UGGGCUGUGGUGCCGUGACCUUU						1
hsa-miR-novel-chr12_4052	hsa-mir-novel-chr12_4052	UAGGUAGUUUCAUGUUGUUGGGA						1
hsa-miR-novel-chr12_4061	hsa-mir-novel-chr12_4061	AGGACAGAGGAAGAAGCC						2
hsa-miR-novel-chr12_4146	hsa-mir-novel-chr12_4146	AAAGCAAAUGUUGGGUGAACGGC		12	1	3	7	17		3
hsa-miR-novel-chr12_4186	hsa-mir-novel-chr12_4186	UUUGGGACUGAUCUUGAUGUC				1	1	3
hsa-miR-novel-chr12_4277	hsa-mir-novel-chr12_4277	GCCGCGACGUGUGGAGGC						2
hsa-miR-novel-chr12_4378	hsa-mir-novel-chr12_4378	UUUGCACUGUAAUACCUCGGU					1
hsa-miR-novel-chr12_4465	hsa-mir-novel-chr12_4465	GCUGGAGGACCGGGAGGG									2
hsa-miR-novel-chr12_4540	hsa-mir-novel-chr12_4540	UUGUUGGUGGGGUAAUG	7	169	0	1				2
hsa-miR-novel-chr12_4545	hsa-mir-novel-chr12_4545	UCGGACCCAUUUAAACCGGAG						1
hsa-miR-novel-chr12_4549	hsa-mir-novel-chr12_4549	UGGGGCGUCGCCAAGUGG							3
hsa-miR-novel-chr12_4550	hsa-mir-novel-chr12_4550	UGGGGCGUCGCCAAGUGG							3
hsa-miR-novel-chr12_4555	hsa-mir-novel-chr12_4555	AGCAGUGGAGCCUGCGGC							4
hsa-miR-novel-chr12_4720	hsa-mir-novel-chr12_4720	CCAGGAGGAGAGUGUGGAGUCC						1
hsa-miR-novel-chr12_4879	hsa-mir-novel-chr12_4879	GAAGUCACUGAUACCACG						2
hsa-miR-novel-chr12_4881	hsa-mir-novel-chr12_4881	GUGGCUGGAGAGUUGGUUG	16
hsa-miR-novel-chr12_5034	hsa-mir-novel-chr12_5034	ACUCAAAACCCUUCAGUGACU			0		1
hsa-miR-novel-chr12_5052	hsa-mir-novel-chr12_5052	UUGGUGAUAGGAGUCUGUGAUU					1
hsa-miR-novel-chr12_5121	hsa-mir-novel-chr12_5121	UUUGGGACUGAUCUUGAUGUC				1	1	3
hsa-miR-novel-chr12_5145	hsa-mir-novel-chr12_5145	GCUGGGGCGAGGACGGCGC	20
hsa-miR-novel-chr12_5187	hsa-mir-novel-chr12_5187	UUUCCUCUCUGCCCCAUAGGG			0	1					2
hsa-miR-novel-chr12_5335	hsa-mir-novel-chr12_5335	GGUGGACGUGGCUGUGGCUA						1
hsa-miR-novel-chr13_5556	hsa-mir-novel-chr13_5556	GCACGUGAAACCUUGUC								5
hsa-miR-novel-chr13_5697	hsa-mir-novel-chr13_5697	AAGGGCUAGAGGGAUGGC				1
hsa-miR-novel-chr13_5761	hsa-mir-novel-chr13_5761	GGGGGGACCCUGUGGGA	4		1	6	3	34	37
hsa-miR-novel-chr13_6197	hsa-mir-novel-chr13_6197	UGGUAGAAAUCCAGAAUCUG			0
hsa-miR-novel-chr13_6209	hsa-mir-novel-chr13_6209	GAGGAAGUGGAUGAGAUG						2
hsa-miR-novel-chr13_6413	hsa-mir-novel-chr13_6413	AGAUUUGAGAGGGGCUG		5		1		1	20
hsa-miR-novel-chr14_6480	hsa-mir-novel-chr14_6480	CCUGUCUGAGCGUCGCU	5426	7053	269	759	151	764	17449	1426	1613
hsa-miR-novel-chr14_6526	hsa-mir-novel-chr14_6526	ACUGGGGAGAGGGCUCUGGAGA						1
hsa-miR-novel-chr14_6876	hsa-mir-novel-chr14_6876	UAAUGAAUGUCUCUGGCCAG						1
hsa-miR-novel-chr14_7032	hsa-mir-novel-chr14_7032	UGCAGGUCGUCUUGCAGGGCUUC	7	4	14	6		0	3	5	5
hsa-miR-novel-chr14_7035	hsa-mir-novel-chr14_7035	UCGGAUCCGUCUGAGCUUGG	231	116	7853	4220	19	113	661	486	3440
hsa-miR-novel-chr14_7101	hsa-mir-novel-chr14_7101	AGUAUUACAUGGCCAAUCUCC			54	30	0	0	10		35
hsa-miR-novel-chr14_7115	hsa-mir-novel-chr14_7115	AGGUGGUGCUGCUGGGGC		29
hsa-miR-novel-chr14_7136	hsa-mir-novel-chr14_7136	UGGGCUGCUUUCCUUCAACUCU					1
hsa-miR-novel-chr14_7155	hsa-mir-novel-chr14_7155	UGAAAUGUUUAGGACCACUAG	4	6	14	11	3	3	7		7
hsa-miR-novel-chr14_7275	hsa-mir-novel-chr14_7275	AGAAGUGCUGAAAGACUG				1
hsa-miR-novel-chr14_7387	hsa-mir-novel-chr14_7387	AGUACUGCAAGAACUGCU						2
hsa-miR-novel-chr14_7397	hsa-mir-novel-chr14_7397	GAGGCUGAAGAAAAGGAAG			0	0		1		5
hsa-miR-novel-chr14_7463	hsa-mir-novel-chr14_7463	AGGGGGAAAGUUCUAUAGUC		4	6	5	3	4		12
hsa-miR-novel-chr14_7533	hsa-mir-novel-chr14_7533	CCCGGAUGAUCCUCAGUG	9	14	0	1			5	8
hsa-miR-novel-chr14_7535	hsa-mir-novel-chr14_7535	AGGCCUGUAGAGGGUGGCUGG						2
hsa-miR-novel-chr14_7573	hsa-mir-novel-chr14_7573	UUUGAUGACUGUUCUUCCUGUU				0	1	4
hsa-miR-novel-chr14_7636	hsa-mir-novel-chr14_7636	CUUCUCGGGGUGGGGGGG	18	14	0	4	0	10	37	9	35
hsa-miR-novel-chr14_7660	hsa-mir-novel-chr14_7660	UUGCUCUGCUCUCCCUUGUACU						1
hsa-miR-novel-chr14_7662	hsa-mir-novel-chr14_7662	GUUCGACAAACGUUUCCUGAG						1
hsa-miR-novel-chr14_7700	hsa-mir-novel-chr14_7700	UAUGUGGGACGGUAAACC			1
hsa-miR-novel-chr15_8117	hsa-mir-novel-chr15_8117	GUGGAGCCUGUGGCCUA							4
hsa-miR-novel-chr15_8128	hsa-mir-novel-chr15_8128	AGGGAAGCUGACUGAGGC		31				1	3
hsa-miR-novel-chr15_8147	hsa-mir-novel-chr15_8147	UUGGGACUGGCUCAGAG	16		0			1
hsa-miR-novel-chr15_8338	hsa-mir-novel-chr15_8338	UAACUGAUCUCUACUUUGGCUUU					1
hsa-miR-novel-chr15_8417	hsa-mir-novel-chr15_8417	AAGCAAUACUGUUACCUGAAA				0		1
hsa-miR-novel-chr15_8438	hsa-mir-novel-chr15_8438	CGCUGCUUUUCCGGGUCC						0
hsa-miR-novel-chr15_8495	hsa-mir-novel-chr15_8495	UUCCUGGCUGGUGCACC	7			0		4
hsa-miR-novel-chr15_8551	hsa-mir-novel-chr15_8551	UGUGGUAAUAUAGAAAUUGAAG				0	1
hsa-miR-novel-chr15_8649	hsa-mir-novel-chr15_8649	CUGGGCAAGUGUAUGUGUGCAUGG						1
hsa-miR-novel-chr15_8753	hsa-mir-novel-chr15_8753	UUCGGUUAUCUAGCUUUAUGA							2
hsa-miR-novel-chr15_8759	hsa-mir-novel-chr15_8759	UUGGACUUUUUCAGAUUUGGG						1
hsa-miR-novel-chr15_8760	hsa-mir-novel-chr15_8760	UUGGACUUUUUCAGAUUUGGG						1
hsa-miR-novel-chr15_8797	hsa-mir-novel-chr15_8797	UUCUGGGCUGUAGUGCG	34	26	1	6	0	1	318	12	57
hsa-miR-novel-chr15_8803	hsa-mir-novel-chr15_8803	GGCUGGACUGAGUGGGG	222	29	2	1		3		9	204
hsa-miR-novel-chr15_8822	hsa-mir-novel-chr15_8822	CUGAUUGGUGGGAUCCCC	7		1	11	6	25
hsa-miR-novel-chr16_8831	hsa-mir-novel-chr16_8831	CUGGUGUGGCCGUGGUGCUG						1
hsa-miR-novel-chr16_8987	hsa-mir-novel-chr16_8987	CCUCAGGCUGUAAGUGCAGGCAGA				1
hsa-miR-novel-chr16_9131	hsa-mir-novel-chr16_9131	UAUAGUCCCAGCACUCUCAGA						1
hsa-miR-novel-chr16_9135	hsa-mir-novel-chr16_9135	GGAGGAGCCUGGAGCAGA				0
hsa-miR-novel-chr16_9136	hsa-mir-novel-chr16_9136	GGAGGAGCCUGGAGCAGA				0
hsa-miR-novel-chr16_9137	hsa-mir-novel-chr16_9137	GGAGGAGCUGGAGAUGGAG						1
hsa-miR-novel-chr16_9404	hsa-mir-novel-chr16_9404	AGGAGGAGGCUACUCUAG						2
hsa-miR-novel-chr16_9494	hsa-mir-novel-chr16_9494	UCUGGGCACAGGCGGAUGGAC			0	0	0	3
hsa-miR-novel-chr16_9548	hsa-mir-novel-chr16_9548	GUGGGUACGGCCCAGUGGGGGGGAG				3
hsa-miR-novel-chr16_9829	hsa-mir-novel-chr16_9829	ACAUCCUGGGGCUGGAG		21	1	2			15	8	2
hsa-miR-novel-chr16_9857	hsa-mir-novel-chr16_9857	CGAGAGGACUGGGCUGG						2
hsa-miR-novel-chr16_9958	hsa-mir-novel-chr16_9958	GGUGUGAAACAAGAUUCUGAU						2
hsa-miR-novel-chr16_9991	hsa-mir-novel-chr16_9991	AGGGACAGUGCCUGGUG	18	1106	17	7	0	1	24		2
hsa-miR-novel-chr17_10212	hsa-mir-novel-chr17_10212	ACCACAGUGUGGUUUGGACGUGG				1					1
hsa-miR-novel-chr17_10260	hsa-mir-novel-chr17_10260	ACAGAGUGCCUUCAGGACUGCAG				1
hsa-miR-novel-chr17_10481	hsa-mir-novel-chr17_10481	UAAUGCCCCUAAAAAUCCUU			1	1					2
hsa-miR-novel-chr17_10615	hsa-mir-novel-chr17_10615	UUUGGGGAUUCUAAGAGGAAG	25	24	4	13	23	19	4	15
hsa-miR-novel-chr17_10680	hsa-mir-novel-chr17_10680	CGCCCGGCUGGUGACGUCACGG						1
hsa-miR-novel-chr17_10713	hsa-mir-novel-chr17_10713	UAGUGCUUUCUACUUUAUGGGU						1
hsa-miR-novel-chr17_10765	hsa-mir-novel-chr17_10765	CUGCUGUGAUGACAUUC	18		1	3	2	2	3	4
hsa-miR-novel-chr17_10776	hsa-mir-novel-chr17_10776	ACUGGAGGAAGGUGGGG				1		4
hsa-miR-novel-chr17_10858	hsa-mir-novel-chr17_10858	ACGGUCUGGGGAAAGGCUCCU	397	1297	1	3	1	1	10		7
hsa-miR-novel-chr17_10861	hsa-mir-novel-chr17_10861	GCUGGGCUGAGUUGGCAG						1
hsa-miR-novel-chr17_10867	hsa-mir-novel-chr17_10867	GAAGCAGCGCCUGUCGCAACUCG				1	1	1
hsa-miR-novel-chr17_10893	hsa-mir-novel-chr17_10893	CCGAGGGGUCGGGGCGG			0
hsa-miR-novel-chr17_10897	hsa-mir-novel-chr17_10897	UGACGCCCCUUCUGAUUCUG				0	1
hsa-miR-novel-chr17_10946	hsa-mir-novel-chr17_10946	UAACAGUCUACAGCCAUGGUCG	11	5	632	514	4	7	111	11	514
hsa-miR-novel-chr17_11007	hsa-mir-novel-chr17_11007	CCCUCAGUCCGUAUUGGUCUCU						1
hsa-miR-novel-chr17_11124	hsa-mir-novel-chr17_11124	UGAUGACAACCUGUGGGCGUG					1
hsa-miR-novel-chr17_11138	hsa-mir-novel-chr17_11138	CCCACUGCUAAAUUUGAC				10	4	1
hsa-miR-novel-chr17_11203	hsa-mir-novel-chr17_11203	GUGGAGAAGAUGGUGGAG						1
hsa-miR-novel-chr17_11324	hsa-mir-novel-chr17_11324	UCUGAUCUCGGAAGCUAAGCAGG	18	41	3	13	4	27	267	2	402
hsa-miR-novel-chr17_11355	hsa-mir-novel-chr17_11355	GAGGUGCGUGGCUGGGGC	13
hsa-miR-novel-chr17_11424	hsa-mir-novel-chr17_11424	CGCUGGCGCGGCUGGAG						2		3
hsa-miR-novel-chr17_11455	hsa-mir-novel-chr17_11455	UACCCUGUAGAUCCGAAUUUGU	165	167	130	57	441	48	28	63	18
hsa-miR-novel-chr17_11473	hsa-mir-novel-chr17_11473	AUAGGCUAGAAGUGGAAGUG						1
hsa-miR-novel-chr17_11560	hsa-mir-novel-chr17_11560	UAGUGCAAUAUUGCUUAUAGGGU			1	9	3	19		9
hsa-miR-novel-chr17_11633	hsa-mir-novel-chr17_11633	ACCAUGACUGUUCUCAAAGUUUGAA						2
hsa-miR-novel-chr17_11655	hsa-mir-novel-chr17_11655	UCUGGGGAGUGUGUGUGAUAG	9		1
hsa-miR-novel-chr17_11664	hsa-mir-novel-chr17_11664	GAGAGGGAGUCUGAGAAA						1
hsa-miR-novel-chr17_11673	hsa-mir-novel-chr17_11673	GGGUGGGCUGGGGAAAGGC						1
hsa-miR-novel-chr17_11727	hsa-mir-novel-chr17_11727	CCUGCUGGGGAACUCUGCACCG						1
hsa-miR-novel-chr17_11751	hsa-mir-novel-chr17_11751	UGGAGUGUGGGGCAUGGUUGG			1
hsa-miR-novel-chr18_11985	hsa-mir-novel-chr18_11985	ACGUGAAACCCUGUCUG				0			5
hsa-miR-novel-chr18_11993	hsa-mir-novel-chr18_11993	UGGGGUUGUGGGGUCUGG	7	7
hsa-miR-novel-chr18_12079	hsa-mir-novel-chr18_12079	GGUGGGGGCGCGCGGGC	43	41		0			3		12
hsa-miR-novel-chr18_12170	hsa-mir-novel-chr18_12170	AAUAUGCUGUUGGUUAAUUUAUG				1
hsa-miR-novel-chr18_12226	hsa-mir-novel-chr18_12226	UCCGGAGCUGAGGAGACG					1
hsa-miR-novel-chr18_12250	hsa-mir-novel-chr18_12250	UGGAAUGUAAAGAAGUAUGUAU	19258	20580	1631	1507	957	5006	1453	5028	1497
hsa-miR-novel-chr18_12453	hsa-mir-novel-chr18_12453	UGCGAAUGCAGACAUGAG	20		0			1
hsa-miR-novel-chr18_12515	hsa-mir-novel-chr18_12515	AAGGCUCUGUGGGAGGAU	13	26
hsa-miR-novel-chr19_12654	hsa-mir-novel-chr19_12654	UUAGGGAAUGGGGAAAGGGGA						1
hsa-miR-novel-chr19_12665	hsa-mir-novel-chr19_12665	ACUGGGAAGGACCGGGUGAG					0	1
hsa-miR-novel-chr19_12764	hsa-mir-novel-chr19_12764	UUCCUGCUGAACUGAGCCAGU			1	1		0
hsa-miR-novel-chr19_12768	hsa-mir-novel-chr19_12768	AACAUUCAUUGUUGUCGGUGG	19	11	716	469	2	7	31	13	223
hsa-miR-novel-chr19_12826	hsa-mir-novel-chr19_12826	AGGCUGGAGUGCAGUGGC		6			1
hsa-miR-novel-chr19_12896	hsa-mir-novel-chr19_12896	UGCCCUGAGACUUUUGCU			0	1	2	4
hsa-miR-novel-chr19_12957	hsa-mir-novel-chr19_12957	CGAGGAUGAGGAUGAACC					1				1
hsa-miR-novel-chr19_13063	hsa-mir-novel-chr19_13063	AGACACAUUUGGAGAGGGA						2
hsa-miR-novel-chr19_13074	hsa-mir-novel-chr19_13074	UGAGACCUCUGGGUUCUGAG			0	1	4	2	4	2
hsa-miR-novel-chr19_13224	hsa-mir-novel-chr19_13224	UUAGUGGCUCCCUCUGCCUGC					2
hsa-miR-novel-chr19_13225	hsa-mir-novel-chr19_13225	GUGAGUGAAGAAGGUCU		10
hsa-miR-novel-chr19_13276	hsa-mir-novel-chr19_13276	GCGGAAAGGGGGGCGGU	3543	2944	4	4	1	9	10	17	26
hsa-miR-novel-chr19_13292	hsa-mir-novel-chr19_13292	UGUGGCAUGUGCUCAGAG						1
hsa-miR-novel-chr19_13300	hsa-mir-novel-chr19_13300	AGUGGGUGCUUGAGGAGAGA	20
hsa-miR-novel-chr19_13344	hsa-mir-novel-chr19_13344	CAGCCCGGAUCCCAGCCCACU						0
hsa-miR-novel-chr19_13407	hsa-mir-novel-chr19_13407	GUGAGUGGAGCUGAAGGGGAGGA	9	10				1
hsa-miR-novel-chr19_13535	hsa-mir-novel-chr19_13535	GGGAAGGUGGCUCGGGG	287	436	11	25	1	152	113	14	110
hsa-miR-novel-chr19_13751	hsa-mir-novel-chr19_13751	ACUGCACUCCAGCCUGGGC	101	10	1	1	0	1	10		7
hsa-miR-novel-chr19_13779	hsa-mir-novel-chr19_13779	CGGCUGAGGUGGGAUCCC	16	43		1	0	6
hsa-miR-novel-chr1_13881	hsa-mir-novel-chr1_13881	AGGGCUGCUGGUGGUCAGC								7
hsa-miR-novel-chr1_13926	hsa-mir-novel-chr1_13926	AAGGGCAGGGCUCCCUGG			1		1	7
hsa-miR-novel-chr1_13955	hsa-mir-novel-chr1_13955	UCAAGUAGUUUCAUGAUAAAGGG			0
hsa-miR-novel-chr1_14034	hsa-mir-novel-chr1_14034	AUGGGGGCUUCUGUAGAGAUU					0
hsa-miR-novel-chr1_14038	hsa-mir-novel-chr1_14038	AUGGGGGCUUCUGUAGAGAUU					0
hsa-miR-novel-chr1_14075	hsa-mir-novel-chr1_14075	CUCUCGUCUGCACUGCGUG						2
hsa-miR-novel-chr1_14098	hsa-mir-novel-chr1_14098	GGGGAGACUGGAAUUCCUG	16	3574	2	6			10		1
hsa-miR-novel-chr1_14127	hsa-mir-novel-chr1_14127	CGCUGCUUUUCCGGGUCC						0
hsa-miR-novel-chr1_14263	hsa-mir-novel-chr1_14263	UGAGUGUUGUCUACGAGGG								3
hsa-miR-novel-chr1_14269	hsa-mir-novel-chr1_14269	CCAGGCUGGUGUGCUCUCUGGUG		10				1
hsa-miR-novel-chr1_14561	hsa-mir-novel-chr1_14561	AGAGGACACAGUCUGAGUGGU			0	22				8	3
hsa-miR-novel-chr1_14607	hsa-mir-novel-chr1_14607	CUUGAGACUCUGGGUCAGU			1	1	1	1		2
hsa-miR-novel-chr1_14618	hsa-mir-novel-chr1_14618	UUGGGUUGGUGCAAAAGUAAU					0
hsa-miR-novel-chr1_14754	hsa-mir-novel-chr1_14754	GGACGGGCGCGGGGACGGC						1
hsa-miR-novel-chr1_14771	hsa-mir-novel-chr1_14771	AAAAGCUGGGUUGAGAGGGC	551	182	26	33	20	34	9	30	6
hsa-miR-novel-chr1_14840	hsa-mir-novel-chr1_14840	ACACUCAUCAACUGUGCCUGACA						0
hsa-miR-novel-chr1_14884	hsa-mir-novel-chr1_14884	GAUGGGAUCGGAGCUCUAGAG						1
hsa-miR-novel-chr1_14972	hsa-mir-novel-chr1_14972	UUCGGUUAUCUAGCUUUAUGA							2
hsa-miR-novel-chr1_15220	hsa-mir-novel-chr1_15220	CCUGUUCGUAAAUGUUAGUGGA				1	1
hsa-miR-novel-chr1_15325	hsa-mir-novel-chr1_15325	GCUGCUGGCAGGACUGGC		6
hsa-miR-novel-chr1_15326	hsa-mir-novel-chr1_15326	GCUGCUGGCAGGACUGGC		6
hsa-miR-novel-chr1_15366	hsa-mir-novel-chr1_15366	UCCUUCAUUCCACCGGAGUCUGU		5	0	1					3
hsa-miR-novel-chr1_15417	hsa-mir-novel-chr1_15417	UUUGGCCUUUUAUGUUCUUGA					3	1
hsa-miR-novel-chr1_15511	hsa-mir-novel-chr1_15511	UCAUGUUGCUCUGCUGUUGCC						2
hsa-miR-novel-chr1_15570	hsa-mir-novel-chr1_15570	UAGGGUAUUUAGCUGUUAACU				0			2		2
hsa-miR-novel-chr1_15671	hsa-mir-novel-chr1_15671	UUGCCUGGAUCAUUCUGAUCA						1
hsa-miR-novel-chr1_15787	hsa-mir-novel-chr1_15787	UGAGUGAGUGGAAACUGGGAG			0	0	0	2
hsa-miR-novel-chr1_15846	hsa-mir-novel-chr1_15846	UCACUCUAGGGUUGGGGACAGU	13
hsa-miR-novel-chr1_15872	hsa-mir-novel-chr1_15872	CCCCUGACUUGUGUUUUCCAGA						1
hsa-miR-novel-chr1_15877	hsa-mir-novel-chr1_15877	CCUGGAGGCAGGAGCUGA						1
hsa-miR-novel-chr1_15933	hsa-mir-novel-chr1_15933	GAAAGACUUUGACAGCGCA	16
hsa-miR-novel-chr1_15990	hsa-mir-novel-chr1_15990	UGAGGAUGGAUAGCAAGGAAG			0	0	1	4
hsa-miR-novel-chr1_15997	hsa-mir-novel-chr1_15997	UGUUUAACCUUUUGCCUGUUGG						1
hsa-miR-novel-chr1_16165	hsa-mir-novel-chr1_16165	CGGCGGGGGCCGGCGGCGG						1
hsa-miR-novel-chr1_16176	hsa-mir-novel-chr1_16176	UAUUGGAAUCCCCGCUAGAGCG						1
hsa-miR-novel-chr1_16253	hsa-mir-novel-chr1_16253	AGCUGGGCUGACUGCUGACUCACA						1
hsa-miR-novel-chr1_16420	hsa-mir-novel-chr1_16420	CUUGAGACUCUGGGUCAGU			1	1	1	1		2
hsa-miR-novel-chr1_16507	hsa-mir-novel-chr1_16507	CGUGGUCUUCGGGGAGAGA				2	1	1
hsa-miR-novel-chr1_16513	hsa-mir-novel-chr1_16513	GGGACCCAGAAGGAGAGC		8
hsa-miR-novel-chr1_16514	hsa-mir-novel-chr1_16514	GGGACCCAGAAGGAGAGC		8
hsa-miR-novel-chr1_16583	hsa-mir-novel-chr1_16583	ACACUCAUCAACUGUGCCUGACA						0
hsa-miR-novel-chr1_16600	hsa-mir-novel-chr1_16600	AUGGGGGCUUCUGUAGAGAUU					0
hsa-miR-novel-chr1_16621	hsa-mir-novel-chr1_16621	UUCAGAAAUAGGAAGGUGGAAG						1
hsa-miR-novel-chr1_16678	hsa-mir-novel-chr1_16678	UAAAUGUCAGCAAGAAAGGAA						1
hsa-miR-novel-chr1_16869	hsa-mir-novel-chr1_16869	AUGGAGGUCUCUGUCUGGCUU			0	0	1	1
hsa-miR-novel-chr1_16928	hsa-mir-novel-chr1_16928	AGGAGCUGGGAAGGGGUU						1
hsa-miR-novel-chr1_17005	hsa-mir-novel-chr1_17005	AACAUUCAUUGCUGUCGGUGG	55	15	1866	1174	24	23	118	46	399
hsa-miR-novel-chr1_17007	hsa-mir-novel-chr1_17007	AACAUUCAACGCUGUCGGUGA	135	112	1261	679	87	71	180	68	383
hsa-miR-novel-chr1_17046	hsa-mir-novel-chr1_17046	ACGUGAAACCCUGUCUG				0			5
hsa-miR-novel-chr1_17053	hsa-mir-novel-chr1_17053	AGAGGCUGAAGAAUGAAG			1	3		1		2
hsa-miR-novel-chr1_17071	hsa-mir-novel-chr1_17071	GGAGGAGGAGAAAGAGAC		10
hsa-miR-novel-chr1_17151	hsa-mir-novel-chr1_17151	UGACCUAUGAAUUGACAG			0	1	2	1
hsa-miR-novel-chr1_17194	hsa-mir-novel-chr1_17194	AAAAGCUGGGUUGAGAGGGC	551	182	26	33	20	34	9	30	6
hsa-miR-novel-chr1_17241	hsa-mir-novel-chr1_17241	AGGGCCGGUUCUGAGGUUGAG						1
hsa-miR-novel-chr1_17247	hsa-mir-novel-chr1_17247	ACUGCUGCGGGUACUGCUGG				1
hsa-miR-novel-chr1_17337	hsa-mir-novel-chr1_17337	UCUCUGGGCUGUUACUG	18
hsa-miR-novel-chr20_17596	hsa-mir-novel-chr20_17596	AGGAAGAGGCUGUGGCC				1
hsa-miR-novel-chr20_17674	hsa-mir-novel-chr20_17674	AGGAGCACGGCUGGAUAG		67	1	8			23		1
hsa-miR-novel-chr20_17693	hsa-mir-novel-chr20_17693	AAUGCUGGCGCUUUCACACACUC				1
hsa-miR-novel-chr20_17736	hsa-mir-novel-chr20_17736	GAAGGAAGGAGAGAGCUC				1
hsa-miR-novel-chr20_17815	hsa-mir-novel-chr20_17815	AGUGGCUGGAUGGCAAGC	16
hsa-miR-novel-chr20_17827	hsa-mir-novel-chr20_17827	AACAUCAGGAUUUUUAAAAGCC				1
hsa-miR-novel-chr20_17837	hsa-mir-novel-chr20_17837	CACUGUGGAAGGGGAGAAGGAA						2
hsa-miR-novel-chr20_17913	hsa-mir-novel-chr20_17913	UUGGUCCCCUUCAACCAGCUGU	144	137	71	30	81	40	18	28	52
hsa-miR-novel-chr20_17992	hsa-mir-novel-chr20_17992	AUAUGCAUAUGCCUCUGACACAA						1
hsa-miR-novel-chr20_17993	hsa-mir-novel-chr20_17993	AGAAGGGACACUGCUGGUGGUA						1
hsa-miR-novel-chr20_18217	hsa-mir-novel-chr20_18217	UUUCCCUUCAGAGCCUGGCUU	7		1
hsa-miR-novel-chr20_18271	hsa-mir-novel-chr20_18271	GGGGCGCGCGGGCUGGGC	4	7							1
hsa-miR-novel-chr20_18292	hsa-mir-novel-chr20_18292	UGGGCACUGGGUAGAGG		21
hsa-miR-novel-chr20_18309	hsa-mir-novel-chr20_18309	CGGGCUGGGGGCGAAGCGGG									1
hsa-miR-novel-chr20_18310	hsa-mir-novel-chr20_18310	CGGGCUGGGGGCGAAGCGGG									1
hsa-miR-novel-chr20_18380	hsa-mir-novel-chr20_18380	CCGGAUCGCGGAGCCGCG		19
hsa-miR-novel-chr20_18399	hsa-mir-novel-chr20_18399	UGAGGUAGUAGUUUGUG	6	17	7	120	127	231	5	33	3
hsa-miR-novel-chr21_18665	hsa-mir-novel-chr21_18665	CGGUGUCGUCCGCCGUCGCGCGCC				0
hsa-miR-novel-chr21_18975	hsa-mir-novel-chr21_18975	UCUCUGGGCCUGUGUCUU			9	6		0			2
hsa-miR-novel-chr21_18976	hsa-mir-novel-chr21_18976	UCUCUGGGCCUGUGUCUU			9	6		0			2
hsa-miR-novel-chr21_19107	hsa-mir-novel-chr21_19107	CGGGGGGCGGGGCGGAC	270	175	1	2		4	13	1	21
hsa-miR-novel-chr21_19108	hsa-mir-novel-chr21_19108	CGGGGGGCGGGGCGGAC	270	175	1	2		4	13	1	21
hsa-miR-novel-chr21_19152	hsa-mir-novel-chr21_19152	CCCUGGGCAGGCUGCUGG					0	1
hsa-miR-novel-chr21_19181	hsa-mir-novel-chr21_19181	CAUUGUCCUGGCGUUGACCUUGUAC								5
hsa-miR-novel-chr21_19259	hsa-mir-novel-chr21_19259	GUGGGAGCUGGAAACAG				0	1	3
hsa-miR-novel-chr21_19315	hsa-mir-novel-chr21_19315	GAGACAGGUGCUGCAUG						3	4
hsa-miR-novel-chr21_19321	hsa-mir-novel-chr21_19321	UGGGAUGAUGUGAUGCUA						1
hsa-miR-novel-chr21_19440	hsa-mir-novel-chr21_19440	ACUUGGAGUGGGGAAGGUG						2
hsa-miR-novel-chr22_19474	hsa-mir-novel-chr22_19474	AUGCUGGGGUCGGUGGU	20			1	1	1	18
hsa-miR-novel-chr22_19493	hsa-mir-novel-chr22_19493	UGUGCAGGUGCUGUGUGGGCA			1	0		1
hsa-miR-novel-chr22_19498	hsa-mir-novel-chr22_19498	UGGUCCAACGACAGGAGUAGG					1	7
hsa-miR-novel-chr22_19643	hsa-mir-novel-chr22_19643	UUGUCCUCUAGGGCCUGCA						1
hsa-miR-novel-chr22_19694	hsa-mir-novel-chr22_19694	GGAGGAAUGGCAGAGCGG	18
hsa-miR-novel-chr22_19735	hsa-mir-novel-chr22_19735	UGCCAUUCUGCAGAACCUGUCAGC						2
hsa-miR-novel-chr22_19736	hsa-mir-novel-chr22_19736	UGCCAUUCUGCAGAACCUGUCAGC						2
hsa-miR-novel-chr22_19739	hsa-mir-novel-chr22_19739	CUGGGUGACUAGAGUGUG						1
hsa-miR-novel-chr22_19746	hsa-mir-novel-chr22_19746	UGGGUCUGAGGGUAUGUCUGUGA						1
hsa-miR-novel-chr22_19855	hsa-mir-novel-chr22_19855	CCUGUCUGAGCGUCGCU	5426	7053	269	759	151	764	17449	1426	1613
hsa-miR-novel-chr22_19884	hsa-mir-novel-chr22_19884	AGAGUCGGAGCAGAUGUG				1
hsa-miR-novel-chr22_19983	hsa-mir-novel-chr22_19983	GACUGACUGGCUGGCUAGU		19
hsa-miR-novel-chr22_20003	hsa-mir-novel-chr22_20003	CUCUCCAGCCACCUUUUU				16	1		7	24	9
hsa-miR-novel-chr22_20044	hsa-mir-novel-chr22_20044	CCAGCACAGCGUGGAAGGAGA					0
hsa-miR-novel-chr22_20056	hsa-mir-novel-chr22_20056	AGGGAGGCUGAGAAACGG									3
hsa-miR-novel-chr22_20059	hsa-mir-novel-chr22_20059	AGAGGAGGAAGAGAGAGC		14
hsa-miR-novel-chr22_20099	hsa-mir-novel-chr22_20099	AUCUGUUCCCUGGGCUGGAAG					0	1
hsa-miR-novel-chr22_20108	hsa-mir-novel-chr22_20108	UUGAGGUCGGACAUGGUGGCU			2	3	9	4
hsa-miR-novel-chr22_20109	hsa-mir-novel-chr22_20109	GAUCCCAGGUCAAGGCUGCAGUG					0	3
hsa-miR-novel-chr22_20186	hsa-mir-novel-chr22_20186	UAGGGUUCUGAUGUCACUUCU				0		1
hsa-miR-novel-chr2_20246	hsa-mir-novel-chr2_20246	AUCUCAUGCCUGUGCUCCGGA					1	1
hsa-miR-novel-chr2_20308	hsa-mir-novel-chr2_20308	GUGGAGGGCAAGUCUGG							73	2	42
hsa-miR-novel-chr2_20466	hsa-mir-novel-chr2_20466	CCAAGGAAGGCAGCAGGC			0	1	1		71	5	20
hsa-miR-novel-chr2_20539	hsa-mir-novel-chr2_20539	UCCAGGAACCACUUGCCUCCACC						2
hsa-miR-novel-chr2_20713	hsa-mir-novel-chr2_20713	UCAGGACACUUCUGAACUUGGA						1
hsa-miR-novel-chr2_20933	hsa-mir-novel-chr2_20933	AUUCAGCUGUGAAUGAGGGUU						2
hsa-miR-novel-chr2_20981	hsa-mir-novel-chr2_20981	ACUGGCACUGGUGUUGAG			1
hsa-miR-novel-chr2_21056	hsa-mir-novel-chr2_21056	AAGGGCAAUACAUAAUGACA				1		1
hsa-miR-novel-chr2_21244	hsa-mir-novel-chr2_21244	UAGGGUAUUUAGCUGUUAACU				0			2		2
hsa-miR-novel-chr2_21366	hsa-mir-novel-chr2_21366	UACCCUGUAGAACCGAAUUUGU	402	266	172	86	13	50	85	82	53
hsa-miR-novel-chr2_21492	hsa-mir-novel-chr2_21492	AGCUGGGUUCAGAACGU	150	164	3	11	3	14	59	19	2
hsa-miR-novel-chr2_21604	hsa-mir-novel-chr2_21604	UCCUGGCAGGAAGCUCCA						1
hsa-miR-novel-chr2_21677	hsa-mir-novel-chr2_21677	CGAUGGGCAGAAGGGCAGCU						3
hsa-miR-novel-chr2_21991	hsa-mir-novel-chr2_21991	UGUGUGAGACUCUACCCAG						1
hsa-miR-novel-chr2_22073	hsa-mir-novel-chr2_22073	CACAGGGCUAGUAGAUGGU					1
hsa-miR-novel-chr2_22272	hsa-mir-novel-chr2_22272	CGGGCGUGGGGGUGGGGGC	1517	7	1			1		2	1
hsa-miR-novel-chr2_22400	hsa-mir-novel-chr2_22400	CGCGGGCCGGAGCGGGG	197	310	15	30	2	160	140	12	121
hsa-miR-novel-chr2_22422	hsa-mir-novel-chr2_22422	GGAGCUUGGUGGCCUGGG				1					1
hsa-miR-novel-chr2_22523	hsa-mir-novel-chr2_22523	GUGGGAGGCUUUGAAGC	10	11	0	4	3	8	28	1
hsa-miR-novel-chr2_22524	hsa-mir-novel-chr2_22524	GUGGGAGGCUUUGAAGC	10	11	0	4	3	8	28	1
hsa-miR-novel-chr2_22548	hsa-mir-novel-chr2_22548	UGUCACUUGGACCUGUGGGGA					1	1
hsa-miR-novel-chr2_22622	hsa-mir-novel-chr2_22622	AAUAGUGUCUAGAAUAUCUUGA				1
hsa-miR-novel-chr2_22685	hsa-mir-novel-chr2_22685	AAAAGUUAACGUGGUUUUUGC						1
hsa-miR-novel-chr2_22802	hsa-mir-novel-chr2_22802	CUUGAACUUGGGACUAAGCCU					1
hsa-miR-novel-chr2_22876	hsa-mir-novel-chr2_22876	GAUGCGUGGCUCAGUUUGG						1
hsa-miR-novel-chr2_22885	hsa-mir-novel-chr2_22885	GGCGUGGGGGUGGGGGC	13
hsa-miR-novel-chr2_23119	hsa-mir-novel-chr2_23119	AGUGGGGCUGGGUGGGGC	4	14
hsa-miR-novel-chr2_23245	hsa-mir-novel-chr2_23245	AGGAGCAGUGGAAGGAGC	11	12		0
hsa-miR-novel-chr3_23313	hsa-mir-novel-chr3_23313	GCUUCCUGGGUCUGGCUGCUGCC		17
hsa-miR-novel-chr3_23387	hsa-mir-novel-chr3_23387	CGGGUGCUGUAGGCUUU	770	930	178	813	35	236	18134	1501	9922
hsa-miR-novel-chr3_23564	hsa-mir-novel-chr3_23564	AAAAAGAUUGAGGCCAUGGU				1
hsa-miR-novel-chr3_23566	hsa-mir-novel-chr3_23566	AGCUGGUGUUGUGAAUCAGGC	16	8	344	237	1	4	24	21	160
hsa-miR-novel-chr3_23600	hsa-mir-novel-chr3_23600	UGUAUCUGGUGGAGGCUGUG						1
hsa-miR-novel-chr3_23790	hsa-mir-novel-chr3_23790	GCAGAAGAACCUGGAAAG						1
hsa-miR-novel-chr3_23982	hsa-mir-novel-chr3_23982	CUCUGUAUAGCCCUGGCUGU				1
hsa-miR-novel-chr3_24142	hsa-mir-novel-chr3_24142	CAGGAAGAAAGCCAAGGA	13
hsa-miR-novel-chr3_24164	hsa-mir-novel-chr3_24164	UGAAUUUUUGUUUGUGACCUG						1
hsa-miR-novel-chr3_24307	hsa-mir-novel-chr3_24307	UGUUGUCGUUCCCCCUGCUU				1	0
hsa-miR-novel-chr3_24314	hsa-mir-novel-chr3_24314	AAAGCAGGAUUCAGACUACA	11	5		9	14	13		5
hsa-miR-novel-chr3_24388	hsa-mir-novel-chr3_24388	AAGACAGAGUGCCACUUACUGA				0		1
hsa-miR-novel-chr3_24465	hsa-mir-novel-chr3_24465	ACUGAGGGGAUGAAGGAUCAGGC	4		1	0	0	4
hsa-miR-novel-chr3_24480	hsa-mir-novel-chr3_24480	GGGGCCGAGGGAGCGAGA				1	2	2
hsa-miR-novel-chr3_24593	hsa-mir-novel-chr3_24593	AAUUCCCAGGGAAGUGCUCUGA						2
hsa-miR-novel-chr3_24668	hsa-mir-novel-chr3_24668	CAUCAGAAUUCAUGGAGGCUAG			0
hsa-miR-novel-chr3_24697	hsa-mir-novel-chr3_24697	GAGGACCCAGAGAAGGAG								5
hsa-miR-novel-chr3_24737	hsa-mir-novel-chr3_24737	AGUGUGAGUGUGUGGGGA						1
hsa-miR-novel-chr3_24847	hsa-mir-novel-chr3_24847	UCUAUACAGACCCUGGCUUUU				0	0	1		1
hsa-miR-novel-chr3_25064	hsa-mir-novel-chr3_25064	CAGGAGAUCGUCACUGCCUUUUAC				2
hsa-miR-novel-chr3_25148	hsa-mir-novel-chr3_25148	AGGCUGUGUGAAACUGAGGCU				0	1
hsa-miR-novel-chr3_25203	hsa-mir-novel-chr3_25203	UGGCUUCUUUAGCACGGACAUGG						1
hsa-miR-novel-chr3_25285	hsa-mir-novel-chr3_25285	UGAAUUUUUGUUUGUGACCUG						1
hsa-miR-novel-chr3_25373	hsa-mir-novel-chr3_25373	AUGUAGGUUCAGUGGUUGU						1
hsa-miR-novel-chr3_25421	hsa-mir-novel-chr3_25421	AGCUUGACUGUGAGACUG	13	50	46	1	1	7	10	11	2
hsa-miR-novel-chr4_25501	hsa-mir-novel-chr4_25501	GGGGGCGGGUCGGGGGU	148		0	2
hsa-miR-novel-chr4_25509	hsa-mir-novel-chr4_25509	CCUGUCCUCUGUGAGCAAGAGA						1
hsa-miR-novel-chr4_25596	hsa-mir-novel-chr4_25596	GGCGGCGGCGGCUUCGGC							5		1
hsa-miR-novel-chr4_25696	hsa-mir-novel-chr4_25696	GCGGGCGGGGACGCGGGC	20
hsa-miR-novel-chr4_25704	hsa-mir-novel-chr4_25704	UGAGCUAGGGAUAUCUCCUGAGA						1
hsa-miR-novel-chr4_25863	hsa-mir-novel-chr4_25863	UUUGAAAGAGCUGUAAGGAGA						1
hsa-miR-novel-chr4_26199	hsa-mir-novel-chr4_26199	ACAGGAUAGGCACUAAAUGGU					1	1
hsa-miR-novel-chr4_26334	hsa-mir-novel-chr4_26334	CGGUGGGGAAGGUGGCU	364	5			1		3	5	8
hsa-miR-novel-chr4_26505	hsa-mir-novel-chr4_26505	CAAAGGUAACUGCAGUUUUUG					0	1
hsa-miR-novel-chr4_26510	hsa-mir-novel-chr4_26510	CCAGGACUGAACCACCACGG						2
hsa-miR-novel-chr4_26712	hsa-mir-novel-chr4_26712	UGGAGAGAUGGCUCAGC	34	83	1	18		7	44	16	14
hsa-miR-novel-chr4_26719	hsa-mir-novel-chr4_26719	UGAAAUGACUUGAGAGG	7		0	40	65	361		4	1
hsa-miR-novel-chr4_26726	hsa-mir-novel-chr4_26726	UUUGAAAGAGCUGUAAGGAGA						1
hsa-miR-novel-chr4_26750	hsa-mir-novel-chr4_26750	UGGGCUGGAGAGAGGUUG			2	2					1
hsa-miR-novel-chr4_26898	hsa-mir-novel-chr4_26898	AGUGUUCCCCUCUGGAGG			1
hsa-miR-novel-chr4_27003	hsa-mir-novel-chr4_27003	UGUGCCCUGAGACUGCUAAG					3
hsa-miR-novel-chr5_27222	hsa-mir-novel-chr5_27222	CGGCGUGUGGACGGCCA				0		7			1
hsa-miR-novel-chr5_27684	hsa-mir-novel-chr5_27684	UUCGGUUAUCUAGCUUUAUGA							2
hsa-miR-novel-chr5_28102	hsa-mir-novel-chr5_28102	AAAGAACUUUGAAAAGAG	11		2	3	1	3	31	2	8
hsa-miR-novel-chr5_28105	hsa-mir-novel-chr5_28105	UGAGAUGAAGCACUGUAGCUCA	249	299	41	39	15	57	48	59	164
hsa-miR-novel-chr5_28135	hsa-mir-novel-chr5_28135	GAUGUUGGCUCAGAAGCA	11					1
hsa-miR-novel-chr5_28146	hsa-mir-novel-chr5_28146	UGUGAGGUUGGCAUUGUUGU	6		1	2	8	9		4
hsa-miR-novel-chr5_28157	hsa-mir-novel-chr5_28157	UACAGGAUAGGUGGGAG			0
hsa-miR-novel-chr5_28158	hsa-mir-novel-chr5_28158	UACAGGAUAGGUGGGAG			0
hsa-miR-novel-chr5_28171	hsa-mir-novel-chr5_28171	UGGAGUGGCUGCUGGAGAU						1
hsa-miR-novel-chr5_28276	hsa-mir-novel-chr5_28276	CGCUUGCUGGAUCUGUGCUGUGC		19	1			4
hsa-miR-novel-chr5_28330	hsa-mir-novel-chr5_28330	CUGGGGAGGACAGCCAUGACA				0		1
hsa-miR-novel-chr5_28496	hsa-mir-novel-chr5_28496	GAAACUGCUGAGCUUGAGUG		29
hsa-miR-novel-chr5_28518	hsa-mir-novel-chr5_28518	GUGAAGAAUGCUGAAGAA						2
hsa-miR-novel-chr5_28525	hsa-mir-novel-chr5_28525	UCUUGGGCCCCACCCCUGGAGA				1
hsa-miR-novel-chr5_28529	hsa-mir-novel-chr5_28529	CUGAAACCGUUUGCUUAC			2
hsa-miR-novel-chr5_28579	hsa-mir-novel-chr5_28579	CGGGGGCGGGCGGGCGU	144
hsa-miR-novel-chr5_28642	hsa-mir-novel-chr5_28642	UUACAGUUGUUCAACCAGUUAC			0
hsa-miR-novel-chr5_28756	hsa-mir-novel-chr5_28756	UUGGACAACUGCAUCAGAGU						2
hsa-miR-novel-chr5_28782	hsa-mir-novel-chr5_28782	GAGGCUGGAGAGAUGGCU		24
hsa-miR-novel-chr5_29117	hsa-mir-novel-chr5_29117	CUGGAGGAAGGCGGGGA				0	5	1
hsa-miR-novel-chr5_29164	hsa-mir-novel-chr5_29164	AGAAGUGCUGCGGAAGGACC	18					1	3
hsa-miR-novel-chr5_29215	hsa-mir-novel-chr5_29215	GCCGGUAGGUGUAGGCGCAGC		312	0	1	0	0	18	22	6
hsa-miR-novel-chr5_29267	hsa-mir-novel-chr5_29267	GGAGGAGGAGAAAGAGAC		10
hsa-miR-novel-chr5_29286	hsa-mir-novel-chr5_29286	UAACGCAUAAUAUGGACAUGU				0	0	2		2
hsa-miR-novel-chr5_29304	hsa-mir-novel-chr5_29304	GAAGCUGGGAAGGAAGAG						1
hsa-miR-novel-chr5_29325	hsa-mir-novel-chr5_29325	GCUGGGGAGGUGAACUGGUGA					1
hsa-miR-novel-chr6_29416	hsa-mir-novel-chr6_29416	AUUGGAAAAAUGUUUAGCCUGCC						1
hsa-miR-novel-chr6_29512	hsa-mir-novel-chr6_29512	UCAGCUCUACAACUCAGUGU					0	1
hsa-miR-novel-chr6_29756	hsa-mir-novel-chr6_29756	UUCUCAGUAGCUCAGUGG						2
hsa-miR-novel-chr6_29758	hsa-mir-novel-chr6_29758	GAGAAUAUGGGAGUCUGUGG						1
hsa-miR-novel-chr6_29883	hsa-mir-novel-chr6_29883	UUUGGUCCCCUUCAACCAGCU			9	2					8
hsa-miR-novel-chr6_29905	hsa-mir-novel-chr6_29905	AGGUAUUGAGAAAGGUCUGAGA				1	0
hsa-miR-novel-chr6_30144	hsa-mir-novel-chr6_30144	GUGGGGGCGCGCGGGCG	31	5	1	7		6	39		8
hsa-miR-novel-chr6_30157	hsa-mir-novel-chr6_30157	GGGGCUGGAGAGGUGGCU	3	13	0
hsa-miR-novel-chr6_30158	hsa-mir-novel-chr6_30158	GGGGCUGGAGAGGUGGCU	3	13	0
hsa-miR-novel-chr6_30192	hsa-mir-novel-chr6_30192	UUGAGCAAGUGAAGUAUGUGGU					1
hsa-miR-novel-chr6_30245	hsa-mir-novel-chr6_30245	UUAAGGUCCCUGAGAAUGGCU				1	1	1
hsa-miR-novel-chr6_30248	hsa-mir-novel-chr6_30248	UGGGUGGUGGUGCAUGG	9	19	3	3	1	12	124	9	65
hsa-miR-novel-chr6_30338	hsa-mir-novel-chr6_30338	CUGGUGAUCGGCGAGCUUGGCGUG						1
hsa-miR-novel-chr6_30350	hsa-mir-novel-chr6_30350	GGGUGUCGUGUAUGAGUGUGG			1
hsa-miR-novel-chr6_30407	hsa-mir-novel-chr6_30407	AAGGCUGUUUGCUUGUCC							10
hsa-miR-novel-chr6_30503	hsa-mir-novel-chr6_30503	UAGGGUUGGUAAAUUUC				0
hsa-miR-novel-chr6_30852	hsa-mir-novel-chr6_30852	UAGGGCUGGUGACUGGGG			0			2
hsa-miR-novel-chr6_30897	hsa-mir-novel-chr6_30897	GAGAAUAUGGGAGUCUGUGG						1
hsa-miR-novel-chr6_30942	hsa-mir-novel-chr6_30942	GCGGCGCGCGGGCGGGGC		52
hsa-miR-novel-chr6_30957	hsa-mir-novel-chr6_30957	UGCUGUGGCUGGGGUGGU		14
hsa-miR-novel-chr6_31233	hsa-mir-novel-chr6_31233	AUCUGGGUCUGCGUGAGUAACU						1
hsa-miR-novel-chr6_31417	hsa-mir-novel-chr6_31417	AGGAGCUGAUAGAUUCCAGAG			0		0				1
hsa-miR-novel-chr7_31552	hsa-mir-novel-chr7_31552	CUCCCCUCUCCCCGCGG		14		1		1	22		3
hsa-miR-novel-chr7_31626	hsa-mir-novel-chr7_31626	CCACUGCACUCCAGCCUG							3
hsa-miR-novel-chr7_31754	hsa-mir-novel-chr7_31754	AGUGCCUGAGGGAGUAAGAGC			0	2	4	6		4
hsa-miR-novel-chr7_31774	hsa-mir-novel-chr7_31774	AGUGCCUGAGGGAGUAAGAGC			0	2	4	6		4
hsa-miR-novel-chr7_31787	hsa-mir-novel-chr7_31787	GAAACUGUGAGGUGGAGC	4			1	0	1		6
hsa-miR-novel-chr7_32031	hsa-mir-novel-chr7_32031	UAAUUUUAUGUAUAAGCUAGU			0	8	2	8	2	9
hsa-miR-novel-chr7_32055	hsa-mir-novel-chr7_32055	CAAAAACCGUAAUUACUUGUG				0		2
hsa-miR-novel-chr7_32071	hsa-mir-novel-chr7_32071	GUUGUUGCCAUGGUAAU								4
hsa-miR-novel-chr7_32202	hsa-mir-novel-chr7_32202	AGAGGAGGAGAGAAGAAU		14
hsa-miR-novel-chr7_32349	hsa-mir-novel-chr7_32349	UUUUUCAUUAUUGCUCCUGACC	3		102	31	1		19	9	29
hsa-miR-novel-chr7_32369	hsa-mir-novel-chr7_32369	GGGGGCUUGGCUCAGUUG							31
hsa-miR-novel-chr7_32378	hsa-mir-novel-chr7_32378	UUCCACUGCCACUACCUAAUU					0
hsa-miR-novel-chr7_32391	hsa-mir-novel-chr7_32391	CAACCUGGAGGACUCCAUGCUG			30	15	1	1		1	22
hsa-miR-novel-chr7_32497	hsa-mir-novel-chr7_32497	UCCGGUUCUCAGGGCUCCACC			6	5	0			2	1
hsa-miR-novel-chr7_32523	hsa-mir-novel-chr7_32523	UGGAAUGGCCUGAAGGUGGA					0			7
hsa-miR-novel-chr7_32553	hsa-mir-novel-chr7_32553	CCCGGGCAGCAGGCGGGUG						1
hsa-miR-novel-chr7_32579	hsa-mir-novel-chr7_32579	UGAGAACCACGUCUGCUCUGA	19		2	12	24	8	11	13
hsa-miR-novel-chr7_32585	hsa-mir-novel-chr7_32585	UCGGCUGUGGGGUCCUGUGG						1
hsa-miR-novel-chr7_32595	hsa-mir-novel-chr7_32595	CCACUGCACUCCAGCCUG							3
hsa-miR-novel-chr7_32666	hsa-mir-novel-chr7_32666	ACUGGCUGGUAGAACUUGUU					1
hsa-miR-novel-chr7_32715	hsa-mir-novel-chr7_32715	AGAGGCUGAAGAAUGAAG			1	3		1		2
hsa-miR-novel-chr7_32719	hsa-mir-novel-chr7_32719	AGUGCCUGAGGGAGUAAGAGU					0	2		1
hsa-miR-novel-chr7_32726	hsa-mir-novel-chr7_32726	GGGGGCAGAGCUUGAUGUGG						3
hsa-miR-novel-chr7_32737	hsa-mir-novel-chr7_32737	AGGUGAUGACAAUGGGAAGAA			1
hsa-miR-novel-chr7_32898	hsa-mir-novel-chr7_32898	ACAUAUAGUGAAUUCUGGGAU				1	2	1
hsa-miR-novel-chr7_33223	hsa-mir-novel-chr7_33223	UUUGGCAAUGGUAGAACUCACA	88	72	147	412	205	600	86	515	534
hsa-miR-novel-chr7_33236	hsa-mir-novel-chr7_33236	AACUUCCACGGUGCAGUAGGUG						1
hsa-miR-novel-chr7_33295	hsa-mir-novel-chr7_33295	AGAGAACUGGAAGAGAGA								6
hsa-miR-novel-chr7_33361	hsa-mir-novel-chr7_33361	CUGCUGAGGCUCAGCUCU									4
hsa-miR-novel-chr7_33401	hsa-mir-novel-chr7_33401	AAGGUGCUGCAUGGCUG		10							2
hsa-miR-novel-chr7_33431	hsa-mir-novel-chr7_33431	CCACUGCUGAAUAUAUAG		19	0	0
hsa-miR-novel-chr8_33486	hsa-mir-novel-chr8_33486	AGGACCCAGAUGUAGCUGUC					1
hsa-miR-novel-chr8_33505	hsa-mir-novel-chr8_33505	AGUGGUUCUCUUGUGGCUCA			0		1			1
hsa-miR-novel-chr8_33642	hsa-mir-novel-chr8_33642	UUGGCUGGUCUCUGCUCCG			1	1	1	2		1
hsa-miR-novel-chr8_33644	hsa-mir-novel-chr8_33644	UGCUGGGCGUGGCUGACUCA					0	2	3
hsa-miR-novel-chr8_33724	hsa-mir-novel-chr8_33724	AGGCUGAGGCAGGAGGAU		5						2
hsa-miR-novel-chr8_33741	hsa-mir-novel-chr8_33741	AAAAGCUGGGUUGAGAGG	9		2	3	1	1
hsa-miR-novel-chr8_33817	hsa-mir-novel-chr8_33817	UAAGGCACGCGGUGAAUGC	42	23	2645	1035	8	33	209	36	1467
hsa-miR-novel-chr8_33845	hsa-mir-novel-chr8_33845	AGUACUUGGAUGGGAGA		50	0	0	2	1	71	5	53
hsa-miR-novel-chr8_33880	hsa-mir-novel-chr8_33880	UGAGGACUGGGACAAGCC						1	5
hsa-miR-novel-chr8_33953	hsa-mir-novel-chr8_33953	AUAAAAUUUCUUGCUCGAGUGGA						1
hsa-miR-novel-chr8_34113	hsa-mir-novel-chr8_34113	GGCUGGUCCGAUGGUAGU	963	358	51	159	170	2485	88	171	6
hsa-miR-novel-chr8_34207	hsa-mir-novel-chr8_34207	UAGGGUUGGUAAAUUUC				0
hsa-miR-novel-chr8_34216	hsa-mir-novel-chr8_34216	AGGCCAAGGAGAACUGG			0	1		1	3	19	7
hsa-miR-novel-chr8_34237	hsa-mir-novel-chr8_34237	UGGCUGACCUGGAGGAUC								5
hsa-miR-novel-chr8_34288	hsa-mir-novel-chr8_34288	CUGGGGAUAGAGCAUUG	49	103	1	9	1	11	10	87	5
hsa-miR-novel-chr8_34300	hsa-mir-novel-chr8_34300	GGGACACAGGUGCUGCA	29	31	0		0	3	5
hsa-miR-novel-chr8_34303	hsa-mir-novel-chr8_34303	AGGGUUGGGUGGAGGCU	4
hsa-miR-novel-chr8_34509	hsa-mir-novel-chr8_34509	UCAGGCUCAGUCCCCUCC			1	3	1
hsa-miR-novel-chr8_34585	hsa-mir-novel-chr8_34585	UUGGGAAAUGAAGUAAUAUGA				1	1	6		5
hsa-miR-novel-chr8_34627	hsa-mir-novel-chr8_34627	AGGUGGGAGACUGUGAAA		12
hsa-miR-novel-chr8_34658	hsa-mir-novel-chr8_34658	UCAAGGUCCGCUGUGAACACGG			0						1
hsa-miR-novel-chr8_34755	hsa-mir-novel-chr8_34755	AGGCUGUGACCAUUGUGGA						2
hsa-miR-novel-chr8_34856	hsa-mir-novel-chr8_34856	UUAUCCUCCAGUAGACUAGGGA			0		0			2
hsa-miR-novel-chr8_34859	hsa-mir-novel-chr8_34859	UUUGAUAAGCUGACAUGGGACA				1
hsa-miR-novel-chr8_35011	hsa-mir-novel-chr8_35011	ACUGGUCUGGCUGAGCCU	4		68	6	19	1	44	12	78
hsa-miR-novel-chr8_35080	hsa-mir-novel-chr8_35080	CUAGACUGAAGCUCCUUGAGG	1619	1329	292	227	864	997	214	1352	64
hsa-miR-novel-chr9_35242	hsa-mir-novel-chr9_35242	CUGGGAAACUUGAGUGC						2
hsa-miR-novel-chr9_35612	hsa-mir-novel-chr9_35612	UGAUUGUUUGUGGAAUAAAUG						2
hsa-miR-novel-chr9_35625	hsa-mir-novel-chr9_35625	AUUGCAGUCGCUGUGCCAGGA					0
hsa-miR-novel-chr9_35774	hsa-mir-novel-chr9_35774	UAGGGAAAAUGUACAGAAAUGG					0	2
hsa-miR-novel-chr9_35792	hsa-mir-novel-chr9_35792	AACAUUCAACGCUGUCGGUGA	135	112	1261	679	87	71	180	68	383
hsa-miR-novel-chr9_35897	hsa-mir-novel-chr9_35897	GCCCAGCUUGAGAAUCGG				0		6
hsa-miR-novel-chr9_35901	hsa-mir-novel-chr9_35901	UCGGGUUUUUUCAGAUUUGGGA					0	2		3
hsa-miR-novel-chr9_36008	hsa-mir-novel-chr9_36008	GGGAAGUGGGGAGGGACU						1
hsa-miR-novel-chr9_36046	hsa-mir-novel-chr9_36046	GCACUGCAGAGGUCAAGG						1
hsa-miR-novel-chr9_36091	hsa-mir-novel-chr9_36091	AAAAGCUGUCCACUGUAGAGU					1
hsa-miR-novel-chr9_36145	hsa-mir-novel-chr9_36145	AGGGAUGAGUUGCUCUGGCU				1
hsa-miR-novel-chr9_36318	hsa-mir-novel-chr9_36318	GUGGGUGGUGGUGCAUG	18	38	3	4	3	19	838	25	242
hsa-miR-novel-chr9_36365	hsa-mir-novel-chr9_36365	CAUGCUGCGCUGGGACUGC						2
hsa-miR-novel-chr9_36429	hsa-mir-novel-chr9_36429	AGCCUGCCUGACUGUGA		7				1
hsa-miR-novel-chr9_36448	hsa-mir-novel-chr9_36448	UCUCUGGGGGUGACUGUCCGU					1
hsa-miR-novel-chr9_36459	hsa-mir-novel-chr9_36459	CUGGUCCAGGGACAGUG		14
hsa-miR-novel-chr9_36596	hsa-mir-novel-chr9_36596	GACUGGGACAGAUGUGCUU				1	0	2
hsa-miR-novel-chr9_36602	hsa-mir-novel-chr9_36602	ACAGUAGUCUGCACAUUGGUU	232	212	25	45	29	59	30	60	57
hsa-miR-novel-chr9_36701	hsa-mir-novel-chr9_36701	CGGGCUGGGGCGGGAAGC	4	4				1
hsa-miR-novel-chr9_36702	hsa-mir-novel-chr9_36702	CGGGCUGGGGCGGGAAGC	4	4				1
hsa-miR-novel-chrX_37031	hsa-mir-novel-chrX_37031	AGGCUGGAUCGUACUCUCCUGG						1
hsa-miR-novel-chrX_37306	hsa-mir-novel-chrX_37306	GGCAGCAGGGCUGUGGCAGC		5					5
hsa-miR-novel-chrX_37461	hsa-mir-novel-chrX_37461	UUGCAUAUGUAGGAUGUCCCA			8	8			6		7
hsa-miR-novel-chrX_37778	hsa-mir-novel-chrX_37778	UGCUACCAGUGAGGCUGACAGA						1
hsa-miR-novel-chrX_37792	hsa-mir-novel-chrX_37792	UGGAAAGAGGAGCAGGCCUAG						2
hsa-miR-novel-chrX_37926	hsa-mir-novel-chrX_37926	AGCUACAUUGUCUGCUGGGUUUC	273	147	1223	710	39	73	201	117	358
hsa-miR-novel-chrX_37928	hsa-mir-novel-chrX_37928	AGCUACAUCUGGCUACUGGGU	37	26	152	136	69	36	18	60	90
hsa-miR-novel-chrX_37932	hsa-mir-novel-chrX_37932	UUCUGUACUGUGGAAGC		14
hsa-miR-novel-chrX_37993	hsa-mir-novel-chrX_37993	UGAGGUAGUAAGUUGUAUUGU	43	23	130	174	158	156	60	140	134
hsa-miR-novel-chrX_38331	hsa-mir-novel-chrX_38331	UUUUGCGAUGUGUUCCUAAU	15	19	11	16	11	19	17	5	4
hsa-miR-novel-chrX_38334	hsa-mir-novel-chrX_38334	UGUGACAGAUUGAUAACUGA			2	3	3	3		6	1
hsa-miR-novel-chrX_38408	hsa-mir-novel-chrX_38408	UGAUUGUAGCCUUUUGGAGU								4
