# Supplementary material for: Hematoma-derived exosomes of chronic subdural hematoma promote abnormal angiogenesis and inhibit hematoma absorption through miR-144-5p
Source: Aging (Albany NY). 2019 Dec 16;11(24):12147–64. doi: 10.18632/aging.102550 (PMC6949077; doi:10.18632/aging.102550)
Supplement: Supplementary Table 4 [file aging-11-102550-s001..xlsx]

## Sheet: up.unpaired.S_vs_C
miRNA expression for S vs C Fold Change cutoff: 2.0 P-value cutoff: 1.0 Column A: Mature miRNA, the mature miRNA name. Column B: Pre-miRNA, the pre-miRNA name. Column C: Sequence, the mature miRNA sequence. Column D: Fold change, Fold change between two groups. Column E: P-value, P-value is calculated by unpaired t-test. Column F: FDR, BH-adjusted P-value. Column G: Regulation, 'up' indicates up-…
miRNA Information			Statistics & Regulation				Mean		Tag counts (normalized)
mature-miRNA	pre-miRNA	mature-sequence	Fold Change	P-value	FDR	Regulation	group S	group C	S-1	S-2	S-3	C-1	C-2	C-3
hsa-let-7a-2-3p	hsa-let-7a-2	CUGUACAGCCUCCUAGCUUUCC	2	0.373901	0.746892	up	2	1			3
hsa-let-7e-5p	hsa-let-7e	UGAGGUAGGAGGUUGUAUAGUU	2.37965	0.330259	0.746892	up	639.333	268.667	463	168	1284	224	272	307
hsa-let-7g-3p	hsa-let-7g	CUGUACAGGCCACUGCCUUGC	2	0.476621	0.793615	up	2.66667	1.33333		5				1
hsa-miR-101-3p	hsa-mir-101-1	UACAGUACUGUGAUAACUGAA	2.26944	0.307837	0.746892	up	1128.67	497.333	464	2125	794	341	281	867
hsa-miR-101-3p	hsa-mir-101-2	UACAGUACUGUGAUAACUGAA	2.26944	0.307837	0.746892	up	1128.67	497.333	464	2125	794	341	281	867
hsa-miR-106b-5p	hsa-mir-106b	UAAAGUGCUGACAGUGCAGAU	5.08333	0.325335	0.746892	up	81.3333	16	41	195	5	18	10	17
hsa-miR-107	hsa-mir-107	AGCAGCAUUGUACAGGGCUAUCA	7.45455	0.12938	0.746892	up	27.3333	3.66667	27	5	47			8
hsa-miR-124-3p	hsa-mir-124-1	UAAGGCACGCGGUGAAUGCC	2.11215	0.617729	0.867677	up	226	107	54	8	613	5		313
hsa-miR-124-3p	hsa-mir-124-2	UAAGGCACGCGGUGAAUGCC	2.11215	0.617729	0.867677	up	226	107	54	8	613	5		313
hsa-miR-124-3p	hsa-mir-124-3	UAAGGCACGCGGUGAAUGCC	2.11215	0.617729	0.867677	up	226	107	54	8	613	5		313
hsa-miR-1249-3p	hsa-mir-1249	ACGCCCUUCCCCCCCUUCUUCA	9.72727	0.149379	0.746892	up	35.6667	3.66667	3	36	65	4		4
hsa-miR-127-5p	hsa-mir-127	CUGAAGCUCAGAGGGCUCUGAU	2.18519	0.439566	0.784977	up	19.6667	9	14	5	37			24
hsa-miR-1278	hsa-mir-1278	UAGUACUGUGCAUAUCAUCUAU	4.5	0.404433	0.770397	up	6	1.33333		15				1
hsa-miR-1287-5p	hsa-mir-1287	UGCUGGAUCAGUGGUUCGAGUC	3	0.158302	0.746892	up	3	1	4	2
hsa-miR-129-2-3p	hsa-mir-129-2	AAGCCCUUACCCCAAAAAGCAU	2.27273	0.442603	0.784977	up	16.6667	7.33333	16		31			19
hsa-miR-1307-5p	hsa-mir-1307	UCGACCGGACCUCGACCGGCU	12.75	0.327339	0.746892	up	17	1.33333	4	44				1
hsa-miR-136-3p	hsa-mir-136	CAUCAUCGUCUCAAAUGAGUCU	2.08473	0.6213	0.870457	up	664.333	318.667	116	66	1808	13	21	919
hsa-miR-137	hsa-mir-137	UUAUUGCUUAAGAAUACGCGUAG	3	0.360876	0.746892	up	22	7.33333	19		44			19
hsa-miR-140-3p	hsa-mir-140	UACCACAGGGUAGAACCACGG	2.94118	0.326746	0.746892	up	383.333	130.333	129	817	201	92	48	248
hsa-miR-143-5p	hsa-mir-143	GGUGCAGUGCUGCAUCUCUGGU	4.25	0.0633383	0.746892	up	5.66667	1.33333	3	8	3			1
hsa-miR-144-3p	hsa-mir-144	UACAGUAUAGAUGAUGUACU	4.58035	0.42889	0.779023	up	1149.67	251	260	3180	6	422	141	187
hsa-miR-144-5p	hsa-mir-144	GGAUAUCAUCAUAUACUGUAAG	4.4	0.427838	0.5089	up	18	23.3333	23	21	10	29	24	14
hsa-miR-153-3p	hsa-mir-153-1	UUGCAUAGUCACAAAAGUGAUC	2	0.569673	0.849916	up	10	5	3	1	23			12
hsa-miR-153-3p	hsa-mir-153-2	UUGCAUAGUCACAAAAGUGAUC	2	0.569673	0.849916	up	10	5	3	1	23			12
hsa-miR-154-3p	hsa-mir-154	AAUCAUACACGGUUGACCUAUU	6.66667	0.0605258	0.746892	up	6.66667	1	4	3	10			0
hsa-miR-15a-5p	hsa-mir-15a	UAGCAGCACAUAAUGGUUUGUG	3.66667	0.21948	0.746892	up	7.33333	2	5	13	1			3
hsa-miR-16-5p	hsa-mir-16-1	UAGCAGCACGUAAAUAUUGGCG	4.96676	0.357567	0.746892	up	597.667	120.333	180	1514	96	127	93	138
hsa-miR-16-5p	hsa-mir-16-2	UAGCAGCACGUAAAUAUUGGCG	4.96676	0.357567	0.746892	up	597.667	120.333	180	1514	96	127	93	138
hsa-miR-17-5p	hsa-mir-17	CAAAGUGCUUACAGUGCAGGUAG	2.36087	0.448071	0.785277	up	362	153.333	166	851	66	189	172	96
hsa-miR-181a-3p	hsa-mir-181a-1	ACCAUCGACCGUUGAUUGUACC	4.05556	0.22135	0.746892	up	24.3333	6	18	5	47	7		8
hsa-miR-183-5p	hsa-mir-183	UAUGGCACUGGUAGAAUUCACU	3.37283	0.386746	0.755509	up	711.667	211	76	364	1692	92	57	481
hsa-miR-185-5p	hsa-mir-185	UGGAGAGAAAGGCAGUUCCUGA	2.15321	0.41963	0.774194	up	8095.33	3759.67	5359	17246	1678	2644	2675	5957
hsa-miR-18a-5p	hsa-mir-18a	UAAGGUGCAUCUAGUGCAGAUAG	2.86667	0.465459	0.78955	up	14.3333	5	4	36		7		5
hsa-miR-192-5p	hsa-mir-192	CUGACCUAUGAAUUGACAGCC	2.03888	0.45916	0.788403	up	314.667	154.333	144	694	103	141	81	238
hsa-miR-194-5p	hsa-mir-194-1	UGUAACAGCAACUCCAUGUGGA	3.7875	0.256248	0.746892	up	101	26.6667	25	208	67	24	10	43
hsa-miR-194-5p	hsa-mir-194-2	UGUAACAGCAACUCCAUGUGGA	3.7875	0.256248	0.746892	up	101	26.6667	25	208	67	24	10	43
hsa-miR-19a-3p	hsa-mir-19a	UGUGCAAAUCUAUGCAAAACUGA	6.58824	0.388337	0.755509	up	37.3333	5.66667	8	101				14
hsa-miR-19b-3p	hsa-mir-19b-1	UGUGCAAAUCCAUGCAAAACUGA	13.44	0.348486	0.746892	up	112	8.33333	20	306	7		5	17
hsa-miR-19b-3p	hsa-mir-19b-2	UGUGCAAAUCCAUGCAAAACUGA	13.44	0.348486	0.746892	up	112	8.33333	20	306	7		5	17
hsa-miR-200a-3p	hsa-mir-200a	UAACACUGUCUGGUAACGAUGU	8.44149	0.418261	0.774194	up	1587	188	33	42	4683	88	86	387
hsa-miR-200a-5p	hsa-mir-200a	CAUCUUACCGGACAGUGCUGGA	2.29412	0.589923	0.864434	up	26	11.3333			75	9	14	8
hsa-miR-200b-3p	hsa-mir-200b	UAAUACUGCCUGGUAAUGAUGA	5.81111	0.412494	0.774194	up	348.667	60	44	21	978	31	48	98
hsa-miR-204-5p	hsa-mir-204	UUCCCUUUGUCAUCCUAUGCCU	2.25301	0.478489	0.793615	up	124.667	55.3333	82	25	264		5	158
hsa-miR-20a-5p	hsa-mir-20a	UAAAGUGCUUAUAGUGCAGGUAG	3.47269	0.396676	0.766284	up	1293	372.333	581	3209	86	355	279	480
hsa-miR-20b-5p	hsa-mir-20b	CAAAGUGCUCAUAGUGCAGGUAG	2.16495	0.548537	0.841774	up	140	64.6667	60	355	2	135	38	18
hsa-miR-21-3p	hsa-mir-21	CAACACCAGUCGAUGGGCUGU	2.66667	0.373901	0.746892	up	2.66667	1	5					0
hsa-miR-210-3p	hsa-mir-210	CUGUGCGUGUGACAGCGGCUGA	2.72857	0.249078	0.746892	up	127.333	46.6667	75	244	60	48	27	62
hsa-miR-23b-3p	hsa-mir-23b	AUCACAUUGCCAGGGAUUACC	2.34483	0.244795	0.746892	up	113.333	48.3333	116	28	193	43	50	49
hsa-miR-25-5p	hsa-mir-25	AGGCGGAGACUUGGGCAAUUG	3.75	0.41266	0.774194	up	5	1.33333		12				1
hsa-miR-2682-5p	hsa-mir-2682	CAGGCAGUGACUGUUCAGACGUC	2	0.373901	0.746892	up	2	1	3
hsa-miR-27b-5p	hsa-mir-27b	AGAGCUUAGCUGAUUGGUGAAC	4.83333	0.057684	0.746892	up	9.66667	2	7	5	14			3
hsa-miR-299-3p	hsa-mir-299	UAUGUGGGAUGGUAAACCGCUU	2	0.373901	0.746892	up	2	1	3
hsa-miR-29a-3p	hsa-mir-29a	UAGCACCAUCUGAAAUCGGUUA	6.55556	0.297225	0.746892	up	157.333	24	57	34	378	11	19	39
hsa-miR-29b-3p	hsa-mir-29b-1	UAGCACCAUUUGAAAUCAGUGUU	2.33333	0.12791	0.746892	up	11.6667	5	6	9	17	4	6	2
hsa-miR-29b-3p	hsa-mir-29b-2	UAGCACCAUUUGAAAUCAGUGUU	2.33333	0.12791	0.746892	up	11.6667	5	6	9	17	4	6	2
hsa-miR-30b-5p	hsa-mir-30b	UGUAAACAUCCUACACUCAGCU	2.12275	0.460036	0.788403	up	1452.67	684.333	422	818	3115	215	303	1532
hsa-miR-30c-2-3p	hsa-mir-30c-2	CUGGGAGAAGGCUGUUUACUCU	3.83333	0.312094	0.746892	up	23	6	14	2	50		5	10
hsa-miR-30e-5p	hsa-mir-30e	UGUAAACAUCCUUGACUGGAAG	3.06785	0.261924	0.746892	up	346.667	113	83	653	301	47	43	246
hsa-miR-31-5p	hsa-mir-31	AGGCAAGAUGCUGGCAUAGCU	2.5	0.250815	0.746892	up	3.33333	1.33333	5		2			1
hsa-miR-3158-3p	hsa-mir-3158-1	AAGGGCUUCCUCUCUGCAGGAC	3.75	0.298754	0.746892	up	5	1.33333	2	10				1
hsa-miR-3158-3p	hsa-mir-3158-2	AAGGGCUUCCUCUCUGCAGGAC	3.75	0.298754	0.746892	up	5	1.33333	2	10				1
hsa-miR-3165	hsa-mir-3165	AGGUGGAUGCAAUGUGACCUCA	2	0.373901	0.746892	up	2	1		3
hsa-miR-3200-3p	hsa-mir-3200	CACCUUGCGCUACUCAGGUCUG	2	0.373901	0.746892	up	2	1		3
hsa-miR-3200-5p	hsa-mir-3200	AAUCUGAGAAGGCGCACAAGGU	2.33333	0.373901	0.746892	up	2.33333	1		4
hsa-miR-330-5p	hsa-mir-330	UCUCUGGGCCUGUGUCUUAGGC	2.58824	0.338681	0.746892	up	29.3333	11.3333	20	7	58	9		22
hsa-miR-331-3p	hsa-mir-331	GCCCCUGGGCCUAUCCUAGAA	2	0.373901	0.746892	up	2	1			3			0
hsa-miR-3607-3p	hsa-mir-3607	ACUGUAAACGCUUUCUGAUG	3.33333	0.373901	0.746892	up	3.33333	1		7
hsa-miR-3688-3p	hsa-mir-3688-1	UAUGGAAAGACUUUGCCACUCU	3	0.158302	0.746892	up	3	1	2	4
hsa-miR-3688-3p	hsa-mir-3688-2	UAUGGAAAGACUUUGCCACUCU	3	0.158302	0.746892	up	3	1	2	4
hsa-miR-369-3p	hsa-mir-369	AAUAAUACAUGGUUGAUCUUU	2.89103	0.54044	0.837172	up	300.667	104	33	11	855		12	297
hsa-miR-374a-3p	hsa-mir-374a	CUUAUCAGAUUGUAUUGUAAUU	4.66667	0.0513744	0.746892	up	4.66667	1	5	5	1
hsa-miR-374b-3p	hsa-mir-374b	CUUAGCAGGUUGUAUUAUCAUU	4.25	0.2126	0.746892	up	5.66667	1.33333		10	4			1
hsa-miR-379-5p	hsa-mir-379	UGGUAGACUAUGGAACGUAGG	2.54491	0.367244	0.746892	up	1275	501	1146	227	2449	96	91	1313
hsa-miR-411-5p	hsa-mir-411	UAGUAGACCGUAUAGCGUACG	2.82192	0.360355	0.746892	up	68.6667	24.3333	34	17	152	20	14	36
hsa-miR-412-5p	hsa-mir-412	UGGUCGACCAGUUGGAAAGUAAU	3.66667	0.373901	0.746892	up	3.66667	1	8
hsa-miR-429	hsa-mir-429	UAAUACUGUCUGGUAAAACCGU	3.33333	0.12417	0.746892	up	3.33333	1	3	4
hsa-miR-433-5p	hsa-mir-433	UACGGUGAGCCUGUCAUUAUUC	3.46154	0.257752	0.746892	up	15	4.33333	11	3	28			10
hsa-miR-451a	hsa-mir-451a	AAACCGUUACCAUUACUGAGUU	16.3831	0.344387	0.746892	up	6072.67	370.667	1329	16693	193	251	203	655
hsa-miR-454-3p	hsa-mir-454	UAGUGCAAUAUUGCUUAUAGGGU	3	0.426893	0.778835	up	4	1.33333		9				1
hsa-miR-4665-5p	hsa-mir-4665	CUGGGGGACGCGUGAGCGCGAGC	2.66667	0.373901	0.746892	up	2.66667	1		5
hsa-miR-487a-3p	hsa-mir-487a	AAUCAUACAGGGACAUCCAGUU	2	0.373901	0.746892	up	2	1	3
hsa-miR-491-5p	hsa-mir-491	AGUGGGGAACCCUUCCAUGAGG	2.85714	0.30957	0.746892	up	6.66667	2.33333		5	12			4
hsa-miR-502-3p	hsa-mir-502	AAUGCACCUGGGCAAGGAUUCA	3.125	0.477603	0.793615	up	33.3333	10.6667	7	90		11	12	6
hsa-miR-505-3p	hsa-mir-505	CGUCAACACUUGCUGGUUUCCU	4.33333	0.116117	0.746892	up	4.33333	1	5	5
hsa-miR-542-3p	hsa-mir-542	UGUGACAGAUUGAUAACUGAAA	3.8	0.263493	0.746892	up	6.33333	1.66667	12		4			2
hsa-miR-548ad-5p	hsa-mir-548ad	AAAAGUAAUUGUGGUUUUUG	4.4	0.408414	0.772598	up	14.6667	3.33333	3	38		5		2
hsa-miR-548ae-5p	hsa-mir-548ae-2	AAAAGUAAUUGUGGUUUUUG	4.4	0.408414	0.772598	up	14.6667	3.33333	3	38		5		2
hsa-miR-548ar-3p	hsa-mir-548ar	UAAAACUGCAGUUAUUUUUGC	5.33333	0.373901	0.746892	up	5.33333	1		13				0
hsa-miR-548at-5p	hsa-mir-548at	AAAAGUUAUUGCGGUUUUGGCU	2	0.373901	0.746892	up	2	1		3
hsa-miR-548ay-5p	hsa-mir-548ay	AAAAGUAAUUGUGGUUUUUGC	3	0.457253	0.788403	up	5	1.66667		12				2
hsa-miR-548k	hsa-mir-548k	AAAAGUACUUGCGGAUUUUGCU	3	0.426893	0.778835	up	4	1.33333		9				1
hsa-miR-548u	hsa-mir-548u	CAAAGACUGCAAUUACUUUUGCG	2	0.373901	0.746892	up	2	1		3
hsa-miR-576-3p	hsa-mir-576	AAGAUGUGGAAAAAUUGGAAUC	3.30769	0.46716	0.790801	up	14.3333	4.33333		38	2		5	5
hsa-miR-579-5p	hsa-mir-579	UCGCGGUUUGUGCCAGAUGACG	2	0.373901	0.746892	up	2	1		3
hsa-miR-590-3p	hsa-mir-590	UAAUUUUAUGUAUAAGCUAGU	4.66667	0.250158	0.746892	up	4.66667	1	2	9				0
hsa-miR-598-3p	hsa-mir-598	UACGUCAUCGUUGUCAUCGUCA	2	0.373901	0.746892	up	2	1	3					0
hsa-miR-618	hsa-mir-618	AAACUCUACUUGUCCUUCUGAGU	3	0.158302	0.746892	up	3	1	4	2
hsa-miR-651-5p	hsa-mir-651	UUUAGGAUAAGCUUGACUUUUG	4.5	0.222236	0.746892	up	6	1.33333	4	11				1
hsa-miR-660-5p	hsa-mir-660	UACCCAUUGCAUAUCGGAGUUG	14	0.306314	0.746892	up	23.3333	1.66667	8	59				2
hsa-miR-6884-5p	hsa-mir-6884	AGAGGCUGAGAAGGUGAUGUUG	2.66667	0.373901	0.746892	up	2.66667	1		5				0
hsa-miR-708-5p	hsa-mir-708	AAGGAGCUUACAAUCUAGCUGGG	3.05333	0.369227	0.746892	up	458	150	229	150	992		10	437
hsa-miR-889-3p	hsa-mir-889	UUAAUAUCGGACAACCAUUGU	7.5	0.127749	0.746892	up	10	1.33333	18	5	4			1
hsa-miR-9-5p	hsa-mir-9-1	UCUUUGGUUAUCUAGCUGUAUGA	7.52647	0.184363	0.746892	up	8434.67	1120.67	8217	686	16398	871	398	2090
hsa-miR-9-5p	hsa-mir-9-2	UCUUUGGUUAUCUAGCUGUAUGA	7.52647	0.184363	0.746892	up	8434.67	1120.67	8217	686	16398	871	398	2090
hsa-miR-9-5p	hsa-mir-9-3	UCUUUGGUUAUCUAGCUGUAUGA	7.52647	0.184363	0.746892	up	8434.67	1120.67	8217	686	16398	871	398	2090
hsa-miR-92a-1-5p	hsa-mir-92a-1	AGGUUGGGAUCGGUUGCAAUGCU	2.33333	0.373901	0.746892	up	2.33333	1		4
hsa-miR-93-5p	hsa-mir-93	CAAAGUGCUGUUCGUGCAGGUAG	2.85155	0.367486	0.746892	up	947.667	332.333	450	2152	238	339	367	288
hsa-miR-96-5p	hsa-mir-96	UUUGGCACUAGCACAUUUUUGCU	4	0.235174	0.746892	up	94.6667	23.6667	3	101	177	20	12	36
hsa-miR-98-5p	hsa-mir-98	UGAGGUAGUAAGUUGUAUUGUU	3.341	0.290841	0.746892	up	290.667	87	167	82	620	89	62	107
hsa-miR-novel-chr10_1232	hsa-mir-novel-chr10_1232	GGUGCUUGGCUGAGGGGC	3.33333	0.12417	0.746892	up	3.33333	1	4		3
hsa-miR-novel-chr10_1711	hsa-mir-novel-chr10_1711	UGUGCAGCAGGCCAACCGAGAA	2	0.373901	0.746892	up	2	1		3
hsa-miR-novel-chr10_251	hsa-mir-novel-chr10_251	UUCUGCCCAGUGCUCUG	5.72603	0.287995	0.746892	up	139.333	24.3333	322	23	70	50	19	1
hsa-miR-novel-chr10_252	hsa-mir-novel-chr10_252	UUCUGCCCAGUGCUCUG	5.72603	0.287995	0.746892	up	139.333	24.3333	322	23	70	50	19	1
hsa-miR-novel-chr11_1898	hsa-mir-novel-chr11_1898	CUCGUCUGAUCUCGGAAG	3.43907	0.326812	0.746892	up	592.667	172.333	412	63	1300	247	253	14
hsa-miR-novel-chr11_1941	hsa-mir-novel-chr11_1941	AUUUGCUGUUAAGAUAUGGGAU	2	0.373901	0.746892	up	2	1	3					0
hsa-miR-novel-chr11_2700	hsa-mir-novel-chr11_2700	CUGUGCGUGUGACAGCGGCUGA	2.72857	0.249078	0.746892	up	127.333	46.6667	75	244	60	48	27	62
hsa-miR-novel-chr11_3489	hsa-mir-novel-chr11_3489	AGCUUGACUCUAGUCUG	36.0152	0.299341	0.746892	up	792.333	22	2083	98	193	47	14	2
hsa-miR-novel-chr12_3715	hsa-mir-novel-chr12_3715	AGGCAUUAGAUUCUCAUAAGGA	4.66667	0.373901	0.746892	up	4.66667	1		11
hsa-miR-novel-chr12_3913	hsa-mir-novel-chr12_3913	AACGUACUAAGAAUAAAUUU	2	0.373901	0.746892	up	2	1		3
hsa-miR-novel-chr12_4549	hsa-mir-novel-chr12_4549	UGGGGCGUCGCCAAGUGG	2	0.373901	0.746892	up	2	1	3
hsa-miR-novel-chr12_4550	hsa-mir-novel-chr12_4550	UGGGGCGUCGCCAAGUGG	2	0.373901	0.746892	up	2	1	3
hsa-miR-novel-chr12_4555	hsa-mir-novel-chr12_4555	AGCAGUGGAGCCUGCGGC	2.33333	0.373901	0.746892	up	2.33333	1	4
hsa-miR-novel-chr13_5556	hsa-mir-novel-chr13_5556	GCACGUGAAACCUUGUC	2.66667	0.373901	0.746892	up	2.66667	1		5
hsa-miR-novel-chr13_5761	hsa-mir-novel-chr13_5761	GGGGGGACCCUGUGGGA	5	0.437893	0.784977	up	13.3333	2.66667	37			4		1
hsa-miR-novel-chr13_6413	hsa-mir-novel-chr13_6413	AGAUUUGAGAGGGGCUG	2.875	0.507158	0.808498	up	7.66667	2.66667	20				5
hsa-miR-novel-chr14_7397	hsa-mir-novel-chr14_7397	GAGGCUGAAGAAAAGGAAG	2.66667	0.373901	0.746892	up	2.66667	1		5				0
hsa-miR-novel-chr14_7636	hsa-mir-novel-chr14_7636	CUUCUCGGGGUGGGGGGG	2.4	0.196186	0.746892	up	28	11.6667	37	9	35	18	14	0
hsa-miR-novel-chr15_8117	hsa-mir-novel-chr15_8117	GUGGAGCCUGUGGCCUA	2.33333	0.373901	0.746892	up	2.33333	1	4
hsa-miR-novel-chr15_8797	hsa-mir-novel-chr15_8797	UUCUGGGCUGUAGUGCG	6.09375	0.320498	0.746892	up	130	21.3333	318	12	57	34	26	1
hsa-miR-novel-chr17_11324	hsa-mir-novel-chr17_11324	UCUGAUCUCGGAAGCUAAGCAGG	10.3692	0.160497	0.746892	up	224.667	21.6667	267	2	402	18	41	3
hsa-miR-novel-chr17_11424	hsa-mir-novel-chr17_11424	CGCUGGCGCGGCUGGAG	2	0.373901	0.746892	up	2	1		3
hsa-miR-novel-chr17_11560	hsa-mir-novel-chr17_11560	UAGUGCAAUAUUGCUUAUAGGGU	3	0.426893	0.778835	up	4	1.33333		9				1
hsa-miR-novel-chr18_11985	hsa-mir-novel-chr18_11985	ACGUGAAACCCUGUCUG	2.66667	0.373901	0.746892	up	2.66667	1	5
hsa-miR-novel-chr19_13074	hsa-mir-novel-chr19_13074	UGAGACCUCUGGGUUCUGAG	3	0.158302	0.746892	up	3	1	4	2				0
hsa-miR-novel-chr1_13881	hsa-mir-novel-chr1_13881	AGGGCUGCUGGUGGUCAGC	3.33333	0.373901	0.746892	up	3.33333	1		7
hsa-miR-novel-chr1_14263	hsa-mir-novel-chr1_14263	UGAGUGUUGUCUACGAGGG	2	0.373901	0.746892	up	2	1		3
hsa-miR-novel-chr1_14561	hsa-mir-novel-chr1_14561	AGAGGACACAGUCUGAGUGGU	4.66667	0.19118	0.746892	up	4.66667	1		8	3			0
hsa-miR-novel-chr1_15570	hsa-mir-novel-chr1_15570	UAGGGUAUUUAGCUGUUAACU	2.33333	0.116117	0.746892	up	2.33333	1	2		2
hsa-miR-novel-chr1_17046	hsa-mir-novel-chr1_17046	ACGUGAAACCCUGUCUG	2.66667	0.373901	0.746892	up	2.66667	1	5
hsa-miR-novel-chr21_19181	hsa-mir-novel-chr21_19181	CAUUGUCCUGGCGUUGACCUUGUAC	2.66667	0.373901	0.746892	up	2.66667	1		5
hsa-miR-novel-chr21_19315	hsa-mir-novel-chr21_19315	GAGACAGGUGCUGCAUG	2.33333	0.373901	0.746892	up	2.33333	1	4
hsa-miR-novel-chr22_20003	hsa-mir-novel-chr22_20003	CUCUCCAGCCACCUUUUU	14.3333	0.0678119	0.746892	up	14.3333	1	7	24	9
hsa-miR-novel-chr22_20056	hsa-mir-novel-chr22_20056	AGGGAGGCUGAGAAACGG	2	0.373901	0.746892	up	2	1			3
hsa-miR-novel-chr2_20308	hsa-mir-novel-chr2_20308	GUGGAGGGCAAGUCUGG	40	0.130579	0.746892	up	40	1	73	2	42
hsa-miR-novel-chr2_20466	hsa-mir-novel-chr2_20466	CCAAGGAAGGCAGCAGGC	33	0.184413	0.746892	up	33	1	71	5	20			0
hsa-miR-novel-chr2_21244	hsa-mir-novel-chr2_21244	UAGGGUAUUUAGCUGUUAACU	2.33333	0.116117	0.746892	up	2.33333	1	2		2
hsa-miR-novel-chr3_23387	hsa-mir-novel-chr3_23387	CGGGUGCUGUAGGCUUU	15.715	0.127372	0.746892	up	9853.33	627	18134	1501	9922	770	930	178
hsa-miR-novel-chr3_24697	hsa-mir-novel-chr3_24697	GAGGACCCAGAGAAGGAG	2.66667	0.373901	0.746892	up	2.66667	1		5
hsa-miR-novel-chr4_25596	hsa-mir-novel-chr4_25596	GGCGGCGGCGGCUUCGGC	3	0.260575	0.746892	up	3	1	5		1
hsa-miR-novel-chr5_28102	hsa-mir-novel-chr5_28102	AAAGAACUUUGAAAAGAG	2.75	0.379841	0.754598	up	14.6667	5.33333	31	2	8	11		2
hsa-miR-novel-chr6_30248	hsa-mir-novel-chr6_30248	UGGGUGGUGGUGCAUGG	5.91176	0.172188	0.746892	up	67	11.3333	124	9	65	9	19	3
hsa-miR-novel-chr6_30407	hsa-mir-novel-chr6_30407	AAGGCUGUUUGCUUGUCC	4.33333	0.373901	0.746892	up	4.33333	1	10
hsa-miR-novel-chr7_31626	hsa-mir-novel-chr7_31626	CCACUGCACUCCAGCCUG	2	0.373901	0.746892	up	2	1	3
hsa-miR-novel-chr7_31754	hsa-mir-novel-chr7_31754	AGUGCCUGAGGGAGUAAGAGC	2.33333	0.373901	0.746892	up	2.33333	1		4				0
hsa-miR-novel-chr7_31774	hsa-mir-novel-chr7_31774	AGUGCCUGAGGGAGUAAGAGC	2.33333	0.373901	0.746892	up	2.33333	1		4				0
hsa-miR-novel-chr7_32031	hsa-mir-novel-chr7_32031	UAAUUUUAUGUAUAAGCUAGU	4.66667	0.250158	0.746892	up	4.66667	1	2	9				0
hsa-miR-novel-chr7_32071	hsa-mir-novel-chr7_32071	GUUGUUGCCAUGGUAAU	2.33333	0.373901	0.746892	up	2.33333	1		4
hsa-miR-novel-chr7_32369	hsa-mir-novel-chr7_32369	GGGGGCUUGGCUCAGUUG	11.3333	0.373901	0.746892	up	11.3333	1	31
hsa-miR-novel-chr7_32523	hsa-mir-novel-chr7_32523	UGGAAUGGCCUGAAGGUGGA	3.33333	0.373901	0.746892	up	3.33333	1		7
hsa-miR-novel-chr7_32595	hsa-mir-novel-chr7_32595	CCACUGCACUCCAGCCUG	2	0.373901	0.746892	up	2	1	3
hsa-miR-novel-chr7_33223	hsa-mir-novel-chr7_33223	UUUGGCAAUGGUAGAACUCACA	3.67097	0.135707	0.746892	up	379.333	103.333	86	515	534	88	72	147
hsa-miR-novel-chr7_33295	hsa-mir-novel-chr7_33295	AGAGAACUGGAAGAGAGA	3	0.373901	0.746892	up	3	1		6
hsa-miR-novel-chr7_33361	hsa-mir-novel-chr7_33361	CUGCUGAGGCUCAGCUCU	2.33333	0.373901	0.746892	up	2.33333	1			4
hsa-miR-novel-chr8_33644	hsa-mir-novel-chr8_33644	UGCUGGGCGUGGCUGACUCA	2	0.373901	0.746892	up	2	1	3
hsa-miR-novel-chr8_33845	hsa-mir-novel-chr8_33845	AGUACUUGGAUGGGAGA	2.49057	0.365162	0.746892	up	44	17.6667	71	5	53		50	0
hsa-miR-novel-chr8_33880	hsa-mir-novel-chr8_33880	UGAGGACUGGGACAAGCC	2.66667	0.373901	0.746892	up	2.66667	1	5
hsa-miR-novel-chr8_34216	hsa-mir-novel-chr8_34216	AGGCCAAGGAGAACUGG	10.6667	0.114696	0.746892	up	10.6667	1	3	19	7			0
hsa-miR-novel-chr8_34237	hsa-mir-novel-chr8_34237	UGGCUGACCUGGAGGAUC	2.66667	0.373901	0.746892	up	2.66667	1		5
hsa-miR-novel-chr8_34585	hsa-mir-novel-chr8_34585	UUGGGAAAUGAAGUAAUAUGA	2.66667	0.373901	0.746892	up	2.66667	1		5
hsa-miR-novel-chr9_35901	hsa-mir-novel-chr9_35901	UCGGGUUUUUUCAGAUUUGGGA	2	0.373901	0.746892	up	2	1		3
hsa-miR-novel-chr9_36318	hsa-mir-novel-chr9_36318	GUGGGUGGUGGUGCAUG	17.871	0.225055	0.746892	up	369.333	20.6667	838	25	242	18	38	3
hsa-miR-novel-chrX_38334	hsa-mir-novel-chrX_38334	UGUGACAGAUUGAUAACUGA	2	0.445614	0.784977	up	3.33333	1.66667		6	1			2
hsa-miR-novel-chrX_38408	hsa-mir-novel-chrX_38408	UGAUUGUAGCCUUUUGGAGU	2.33333	0.373901	0.746892	up	2.33333	1		4

## Sheet: dn.unpaired.S_vs_C
miRNA expression for S vs C Fold Change cutoff: 2.0 P-value cutoff: 1.0 Column A: Mature miRNA, the mature miRNA name. Column B: Pre-miRNA, the pre-miRNA name. Column C: Sequence, the mature miRNA sequence. Column D: Fold change, Fold change between two groups. Column E: P-value, P-value is calculated by unpaired t-test. Column F: FDR, BH-adjusted P-value. Column G: Regulation, 'up' indicates up-…
miRNA Information			Statistics & Regulation				Mean		Tag counts (normalized)
mature-miRNA	pre-miRNA	mature-sequence	Fold Change	P-value	FDR	Regulation	group S	group C	S-1	S-2	S-3	C-1	C-2	C-3
hsa-let-7d-3p	hsa-let-7d	CUAUACGACCUGCUGCCUUUCU	-3.5814	0.261838	0.746892	down	71.6667	256.667	53	21	138	168	74	525
hsa-miR-1-3p	hsa-mir-1-2	UGGAAUGUAAAGAAGUAUGUAU	-5.19634	0.14721	0.746892	down	2660.33	13824	1453	5028	1497	19258	20580	1631
hsa-miR-1-3p	hsa-mir-1-1	UGGAAUGUAAAGAAGUAUGUAU	-5.19634	0.14721	0.746892	down	2660.33	13824	1453	5028	1497	19258	20580	1631
hsa-miR-10a-5p	hsa-mir-10a	UACCCUGUAGAUCCGAAUUUGUG	-3.5	0.0944021	0.746892	down	14	49	14	14	11	64	64	16
hsa-miR-122-5p	hsa-mir-122	UGGAGUGUGACAAUGGUGUUUG	-7.4059	0.134702	0.746892	down	722.667	5352	295	1564	306	8202	7352	499
hsa-miR-1226-5p	hsa-mir-1226	GUGAGGGCAUGCAGGCCUGGAUGGGG	-3.33333	0.373901	0.746892	down	1	3.33333				7
hsa-miR-1246	hsa-mir-1246	AAUGGAUUUUUGGAGCAGG	-10.625	0.129379	0.746892	down	5.33333	56.6667	4	9		63	98	6
hsa-miR-1255a	hsa-mir-1255a	AGGAUGAGCAAAGAAAGUAGAUU	-2.66667	0.373901	0.746892	down	1	2.66667					5
hsa-miR-126-3p	hsa-mir-126	UCGUACCGUGAGUAAUAAUGCG	-2.57907	0.233499	0.746892	down	997	2571.33	440	1113	1435	3952	3326	433
hsa-miR-1270	hsa-mir-1270	CUGGAGAUAUGGAAGAGCUGUGU	-5.33333	0.269443	0.746892	down	1	5.33333				11		2
hsa-miR-128-3p	hsa-mir-128-1	UCACAGUGAACCGGUCUCUUU	-2.65336	0.525663	0.823606	down	1169.33	3102.67	887	324	2294	524	238	8543
hsa-miR-128-3p	hsa-mir-128-2	UCACAGUGAACCGGUCUCUUU	-2.65336	0.525663	0.823606	down	1169.33	3102.67	887	324	2294	524	238	8543
hsa-miR-1299	hsa-mir-1299	UUCUGGAAUUCUGUGUGAGGGA	-2.35714	0.533149	0.833744	down	4.66667	11		11		27		3
hsa-miR-1307-3p	hsa-mir-1307	ACUCGGCGUGGCGUCGGUCGUG	-3.5	0.385053	0.755509	down	2	7	3			16		2
hsa-miR-130b-5p	hsa-mir-130b	ACUCUUUCCCUGUUGCACUAC	-3.46154	0.187452	0.746892	down	4.33333	15	5	5		20	21	1
hsa-miR-133a-5p	hsa-mir-133a-1	AGCUGGUAAAAUGGAACCAAAU	-2	0.476621	0.793615	down	1.33333	2.66667			1	5		0
hsa-miR-133a-5p	hsa-mir-133a-2	AGCUGGUAAAAUGGAACCAAAU	-2	0.476621	0.793615	down	1.33333	2.66667			1	5		0
hsa-miR-134-5p	hsa-mir-134	UGUGACUGGUUGACCAGAGGGG	-2.21147	0.445453	0.784977	down	186	411.333	189	66	300	180	126	925
hsa-miR-139-3p	hsa-mir-139	UGGAGACGCGGCCCUGUUGGAGU	-2.7931	0.238062	0.746892	down	9.66667	27	8	5	13	22	7	49
hsa-miR-1468-5p	hsa-mir-1468	CUCCGUUUGCCUGUUUCGCUG	-2.66667	0.373901	0.746892	down	1	2.66667					5
hsa-miR-148a-3p	hsa-mir-148a	UCAGUGCACUACAGAACUUUGU	-2.70837	0.0393369	0.746892	down	4462.33	12085.7	2585	5832	4967	14988	13799	7467
hsa-miR-149-5p	hsa-mir-149	UCUGGCUCCGUGUCUUCACUCCC	-3.59633	0.442483	0.784977	down	36.3333	130.667	45	14	47	40		349
hsa-miR-151a-5p	hsa-mir-151a	UCGAGGAGCUCACAGUCUAGU	-2.53488	0.295384	0.746892	down	14.3333	36.3333	5	12	23	68	30	8
hsa-miR-154-5p	hsa-mir-154	UAGGUUAUCCGUGUUGCCUUCG	-3.65025	0.501557	0.807408	down	264	963.667	101	25	663	43	29	2816
hsa-miR-16-2-3p	hsa-mir-16-2	CCAAUAUUACUGUGCUGCUUUA	-2.0303	0.32963	0.746892	down	11	22.3333	3	25	2	22	33	9
hsa-miR-181d-5p	hsa-mir-181d	AACAUUCAUUGUUGUCGGUGGGU	-2.80769	0.511968	0.814586	down	52	146	44	18	91	17	15	403
hsa-miR-184	hsa-mir-184	UGGACGGAGAACUGAUAAGGGU	-3.1	0.046576	0.746892	down	16.6667	51.6667		15	32	52	64	36
hsa-miR-191-3p	hsa-mir-191	GCUGCGCUUGGAUUUCGUCCCC	-3.33333	0.373901	0.746892	down	1	3.33333					7
hsa-miR-193b-5p	hsa-mir-193b	CGGGGUUUUGAGGGCGAGAUGA	-5.25	0.154399	0.746892	down	1.33333	7			1	11		7
hsa-miR-195-3p	hsa-mir-195	CCAAUAUUGGCUGUGCUGCUCC	-3	0.106208	0.746892	down	3	9			6	7	5	12
hsa-miR-196a-5p	hsa-mir-196a-1	UAGGUAGUUUCAUGUUGUUGGG	-2.33333	0.373901	0.746892	down	1	2.33333				4
hsa-miR-196a-5p	hsa-mir-196a-2	UAGGUAGUUUCAUGUUGUUGGG	-2.33333	0.373901	0.746892	down	1	2.33333				4
hsa-miR-196b-5p	hsa-mir-196b	UAGGUAGUUUCCUGUUGUUGGG	-2	0.582021	0.856342	down	2.33333	4.66667		4		11
hsa-miR-197-3p	hsa-mir-197	UUCACCACCUUCUCCACCCAGC	-4.1875	0.228939	0.746892	down	5.33333	22.3333	7	4	2	43	19	2
hsa-miR-199a-3p	hsa-mir-199a-1	ACAGUAGUCUGCACAUUGGUUA	-2.91026	0.215817	0.746892	down	26	75.6667	29	16	30	102	114	8
hsa-miR-199a-3p	hsa-mir-199a-2	ACAGUAGUCUGCACAUUGGUUA	-2.91026	0.215817	0.746892	down	26	75.6667	29	16	30	102	114	8
hsa-miR-199a-5p	hsa-mir-199a-1	CCCAGUGUUCAGACUACCUGUUC	-2.37963	0.252504	0.746892	down	36	85.6667	37	33	35	113	130	11
hsa-miR-199a-5p	hsa-mir-199a-2	CCCAGUGUUCAGACUACCUGUUC	-2.37963	0.252504	0.746892	down	36	85.6667	37	33	35	113	130	11
hsa-miR-199b-3p	hsa-mir-199b	ACAGUAGUCUGCACAUUGGUUA	-2.91026	0.215817	0.746892	down	26	75.6667	29	16	30	102	114	8
hsa-miR-199b-5p	hsa-mir-199b	CCCAGUGUUUAGACUAUCUGUUC	-4.53846	0.167432	0.746892	down	4.33333	19.6667	2	5	3	31	24	1
hsa-miR-204-3p	hsa-mir-204	GCUGGGAAGGCAAAGGGACGU	-5.25	0.246379	0.746892	down	1.33333	7			1		4	14
hsa-miR-206	hsa-mir-206	UGGAAUGUAAGGAAGUGUGUGG	-2.46084	0.539234	0.837172	down	332	817	170	37	786	132	129	2187
hsa-miR-2110	hsa-mir-2110	UUGGGGAAACGGCCGCUGAGUG	-5	0.386912	0.755509	down	1.66667	8.33333		2			21	1
hsa-miR-212-5p	hsa-mir-212	ACCUUGGCUCUAGACUGCUUACU	-10.75	0.19915	0.746892	down	1.33333	14.3333			1	11		29
hsa-miR-214-3p	hsa-mir-214	ACAGCAGGCACAGACAGGCAGU	-2	0.536039	0.836669	down	2.66667	5.33333	3		2		12	1
hsa-miR-215-5p	hsa-mir-215	AUGACCUAUGAAUUGACAGAC	-3.46154	0.220648	0.746892	down	4.33333	15		10		22	19	1
hsa-miR-216a-5p	hsa-mir-216a	UAAUCUCAGCUGGCAACUGUGA	-2.33333	0.373901	0.746892	down	1	2.33333						4
hsa-miR-216b-5p	hsa-mir-216b	AAAUCUCUGCAGGCAAAUGUGA	-2.33333	0.373901	0.746892	down	1	2.33333						4
hsa-miR-218-5p	hsa-mir-218-1	UUGUGCUUGAUCUAACCAUGU	-2.38026	0.581699	0.856342	down	783.667	1865.33	469	169	1710	147	93	5353
hsa-miR-218-5p	hsa-mir-218-2	UUGUGCUUGAUCUAACCAUGU	-2.38026	0.581699	0.856342	down	783.667	1865.33	469	169	1710	147	93	5353
hsa-miR-221-3p	hsa-mir-221	AGCUACAUUGUCUGCUGGGUUUC	-2.42415	0.405373	0.770397	down	226.333	548.667	201	117	358	273	147	1223
hsa-miR-223-5p	hsa-mir-223	CGUGUAUUUGACAAGCUGAGUU	-2.34091	0.343022	0.746892	down	14.6667	34.3333	8	29	4	65	26	9
hsa-miR-24-3p	hsa-mir-24-1	UGGCUCAGUUCAGCAGGAACAG	-2.85477	0.218799	0.746892	down	220.333	629	209	171	278	412	291	1181
hsa-miR-24-3p	hsa-mir-24-2	UGGCUCAGUUCAGCAGGAACAG	-2.85477	0.218799	0.746892	down	220.333	629	209	171	278	412	291	1181
hsa-miR-27a-5p	hsa-mir-27a	AGGGCUUAGCUGCUUGUGAGCA	-2.7551	0.235868	0.746892	down	16.3333	45	20	20	6	52	74	6
hsa-miR-28-3p	hsa-mir-28	CACUAGAUUGUGAGCUCCUGGA	-4.12264	0.200127	0.746892	down	35.3333	145.667	53	36	14	247	179	8
hsa-miR-3150b-3p	hsa-mir-3150b	UGAGGAGAUCGUCGAGGUUGG	-4	0.373901	0.746892	down	1	4				9
hsa-miR-320a	hsa-mir-320a	AAAAGCUGGGUUGAGAGGGCGA	-4.39564	0.0711498	0.746892	down	1086	4773.67	569	2134	552	6817	5450	2051
hsa-miR-320c	hsa-mir-320c-1	AAAAGCUGGGUUGAGAGGGU	-8.66667	0.082939	0.746892	down	1	8.66667				11	11	1
hsa-miR-320c	hsa-mir-320c-2	AAAAGCUGGGUUGAGAGGGU	-8.66667	0.082939	0.746892	down	1	8.66667				11	11	1
hsa-miR-323a-5p	hsa-mir-323a	AGGUGGUCCGUGGCGCGUUCGC	-2.66667	0.373901	0.746892	down	1	2.66667						5
hsa-miR-328-3p	hsa-mir-328	CUGGCCCUCUCUGCCCUUCCGU	-2.37276	0.454448	0.788403	down	186	441.333	163	191	201	135	129	1057
hsa-miR-330-3p	hsa-mir-330	GCAAAGCACACGGCCUGCAGAGA	-2.66667	0.373901	0.746892	down	1	2.66667					5	0
hsa-miR-338-5p	hsa-mir-338	AACAAUAUCCUGGUGCUGAGUG	-4.17647	0.475859	0.793615	down	5.66667	23.6667	3		11			68
hsa-miR-339-3p	hsa-mir-339	UGAGCGCCUCGACGACAGAGCCG	-2.66667	0.495212	0.804416	down	2	5.33333	3			13
hsa-miR-339-5p	hsa-mir-339	UCCCUGUCCUCCAGGAGCUCACG	-2.2	0.47837	0.793615	down	3.33333	7.33333	5		2	16		3
hsa-miR-342-5p	hsa-mir-342	AGGGGUGCUAUCUGUGAUUGA	-5.4375	0.111521	0.746892	down	21.3333	116	11	16	34	58	81	206
hsa-miR-345-5p	hsa-mir-345	GCUGACUCCUAGUCCAGGGCUC	-3.85714	0.308959	0.746892	down	2.33333	9	4			4	19	1
hsa-miR-361-3p	hsa-mir-361	UCCCCCAGGUGUGAUUCUGAUUU	-5.2	0.00132658	0.746892	down	11.6667	60.6667	11	5	16	61	50	68
hsa-miR-361-5p	hsa-mir-361	UUAUCAGAAUCUCCAGGGGUAC	-2.20175	0.451251	0.788248	down	38	83.6667	26	13	72	18	45	185
hsa-miR-3614-3p	hsa-mir-3614	UAGCCUUCAGAUCUUGGUGUUUU	-2.66667	0.373901	0.746892	down	1	2.66667					5
hsa-miR-362-5p	hsa-mir-362	AAUCCUUGGAACCUAGGUGUGAGU	-3.11111	0.167079	0.746892	down	3	9.33333		6		11	12	2
hsa-miR-378a-5p	hsa-mir-378a	CUCCUGACUCCAGGUCCUGUGU	-2.64286	0.0964928	0.746892	down	4.66667	12.3333	7		4	16	12	6
hsa-miR-378d	hsa-mir-378d-2	ACUGGACUUGGAGUCAGAAA	-2.33333	0.444988	0.784977	down	3	7		2	4		15	3
hsa-miR-378d	hsa-mir-378d-1	ACUGGACUUGGAGUCAGAAA	-2.33333	0.444988	0.784977	down	3	7		2	4		15	3
hsa-miR-382-5p	hsa-mir-382	GAAGUUGUUCGUGGUGGAUUCG	-3.59811	0.465252	0.78955	down	564	2029.33	378	199	1112	292	174	5619
hsa-miR-410-5p	hsa-mir-410	AGGUUGUCUGUGAUGAGUUCG	-3	0.426893	0.778835	down	1.33333	4			1			9
hsa-miR-423-3p	hsa-mir-423	AGCUCGGUCUGAGGCCCCUCAGU	-2.8	0.0189054	0.746892	down	66.6667	186.667	78	88	31	222	200	135
hsa-miR-423-5p	hsa-mir-423	UGAGGGGCAGAGAGCGAGACUUU	-3.91667	0.0761484	0.746892	down	308	1206.33	325	496	100	1757	1330	529
hsa-miR-425-3p	hsa-mir-425	AUCGGGAAUGUCGUGUCCGCCC	-2.5	0.3658	0.746892	down	4	10		2	7		19	8
hsa-miR-432-5p	hsa-mir-432	UCUUGGAGUAGGUCAUUGGGUGG	-4.10345	0.286093	0.746892	down	9.66667	39.6667	5	20	1	83	31	2
hsa-miR-433-3p	hsa-mir-433	AUCAUGAUGGGCUCCUCGGUGU	-5.69598	0.418176	0.774194	down	132.667	755.667	97	31	267	90	45	2129
hsa-miR-4433b-5p	hsa-mir-4433b	AUGUCCCACCCCCACUCCUGU	-13.6667	0.141858	0.746892	down	1	13.6667				25	12	1
hsa-miR-4446-3p	hsa-mir-4446	CAGGGCUGGCAGUGACAUGGGU	-6.2	0.251579	0.746892	down	1.66667	10.3333			2	22	5	1
hsa-miR-4492	hsa-mir-4492	GGGGCUGGGCGCGCGCC	-4.68681	0.189685	0.746892	down	60.6667	284.333	118	11	50	373	465	12
hsa-miR-4497	hsa-mir-4497	CUCCGGGACGGCUGGGC	-3.33333	0.373901	0.746892	down	1	3.33333					7
hsa-miR-4508	hsa-mir-4508	GCGGGGCUGGGCGCGCG	-5.2963	0.209715	0.746892	down	18	95.3333	37	5	9	182	95	6
hsa-miR-450b-5p	hsa-mir-450b	UUUUGCAAUAUGUUCCUGAAUA	-3	0.222068	0.746892	down	4	12	3	4	2	16	17	0
hsa-miR-452-5p	hsa-mir-452	AACUGUUUGCAGAGGAAACUGA	-5	0.318289	0.746892	down	1	5				11		1
hsa-miR-454-5p	hsa-mir-454	ACCCUAUCAAUAUUGUCUCUGC	-5.66667	0.373901	0.746892	down	1	5.66667					14
hsa-miR-4772-3p	hsa-mir-4772	CCUGCAACUUUGCCUGAUCAGA	-2	0.561438	0.84561	down	2	4		3		9		0
hsa-miR-4792	hsa-mir-4792	CGGUGAGCGCUCGCUGGC	-5	0.373901	0.746892	down	1	5					12
hsa-miR-483-5p	hsa-mir-483	AAGACGGGAGGAAAGAAGGGAG	-18	0.115045	0.746892	down	2	36		2	1	58	45	2
hsa-miR-484	hsa-mir-484	UCAGGCUCAGUCCCCUCCCGAU	-2.8625	0.0639518	0.746892	down	26.6667	76.3333	44	16	17	43	81	102
hsa-miR-495-3p	hsa-mir-495	AAACAAACAUGGUGCACUUCUU	-2.31579	0.588437	0.864234	down	126.667	293.333	39	5	333	38	19	820
hsa-miR-499a-5p	hsa-mir-499a	UUAAGACUUGCAGUGAUGUUU	-5.39252	0.147848	0.746892	down	35.6667	192.333	17	66	21	240	310	24
hsa-miR-511-5p	hsa-mir-511	GUGUCUUUUGCUCUGCAGUCA	-5.66667	0.373901	0.746892	down	1	5.66667					14
hsa-miR-543	hsa-mir-543	AAACAUUCGCGGUGCACUUCUU	-6.02353	0.327626	0.746892	down	28.3333	170.667	22	13	47	54	31	424
hsa-miR-574-5p	hsa-mir-574	UGAGUGUGUGUGUGUGAGUGUGU	-2.75	0.151701	0.746892	down	4	11	5	3	1	9	17	4
hsa-miR-576-5p	hsa-mir-576	AUUCUAAUUUCUCCACGUCUUU	-5.16667	0.253536	0.746892	down	2	10.3333	3			7	21	0
hsa-miR-582-3p	hsa-mir-582	UAACUGGUUGAACAACUGAACC	-4.8	0.387714	0.755509	down	1.66667	8	2			20		1
hsa-miR-582-5p	hsa-mir-582	UUACAGUUGUUCAACCAGUUACU	-2.66667	0.373901	0.746892	down	1	2.66667					5
hsa-miR-589-5p	hsa-mir-589	UGAGAACCACGUCUGCUCUGAG	-3	0.260575	0.746892	down	1	3					5	1
hsa-miR-592	hsa-mir-592	UUGUGUCAAUAUGCGAUGAUGU	-2.73077	0.565443	0.847133	down	17.3333	47.3333	4	4	41			139
hsa-miR-6087	hsa-mir-6087	UGAGGCGGGGGGGCGAGC	-3.76667	0.35012	0.746892	down	10	37.6667	24		3	85	24	1
hsa-miR-654-5p	hsa-mir-654	UGGUGGGCCGCAGAACAUGUGC	-4.84615	0.112925	0.746892	down	4.33333	21	3	5	2	25	31	4
hsa-miR-656-3p	hsa-mir-656	AAUAUUAUACAGUCAACCUCU	-3.33333	0.462862	0.788403	down	2	6.66667	3				17	0
hsa-miR-664a-3p	hsa-mir-664a	UAUUCAUUUAUCCCCAGCCUACA	-2	0.579015	0.856342	down	2.66667	5.33333		3	2	13
hsa-miR-668-3p	hsa-mir-668	UGUCACUCGGCUCGGCCCACUAC	-4.75	0.402413	0.770119	down	1.33333	6.33333			1			16
hsa-miR-6842-3p	hsa-mir-6842	UUGGCUGGUCUCUGCUCCGCAG	-4	0.413612	0.774194	down	2	8		3			20	1
hsa-miR-6852-5p	hsa-mir-6852	CCCUGGGGUUCUGAGGACAUG	-8.5	0.388198	0.755509	down	1.33333	11.3333			1	31
hsa-miR-7-5p	hsa-mir-7-1	UGGAAGACUAGUGAUUUUGUUGU	-2.23357	0.603537	0.866039	down	1014.67	2266.33	1774	393	874	79	79	6638
hsa-miR-7-5p	hsa-mir-7-2	UGGAAGACUAGUGAUUUUGUUGU	-2.23357	0.603537	0.866039	down	1014.67	2266.33	1774	393	874	79	79	6638
hsa-miR-7-5p	hsa-mir-7-3	UGGAAGACUAGUGAUUUUGUUGU	-2.23357	0.603537	0.866039	down	1014.67	2266.33	1774	393	874	79	79	6638
hsa-miR-7152-3p	hsa-mir-7152	UCUGGUCCUGGACAGGAGGC	-2.33333	0.373901	0.746892	down	1	2.33333				4
hsa-miR-744-5p	hsa-mir-744	UGCGGGGCUAGGGCUAACAGCA	-2.08916	0.500373	0.807408	down	138.333	289	127	107	178	85	86	693
hsa-miR-760	hsa-mir-760	CGGCUCUGGGUCUGUGGGGA	-4.38889	0.229941	0.746892	down	6	26.3333	10		5	16	7	53
hsa-miR-7974	hsa-mir-7974	AGGCUGUGAUGCUCUCCUGAGCCC	-2.33333	0.373901	0.746892	down	1	2.33333				4
hsa-miR-885-5p	hsa-mir-885	UCCAUUACACUACCCUGCCUCU	-4	0.121004	0.746892	down	1	4				4	5	0
hsa-miR-941	hsa-mir-941-1	CACCCGGCUGUGUGCACAUGUGC	-2.71429	0.461969	0.788403	down	2.33333	6.33333	3		1		15	1
hsa-miR-941	hsa-mir-941-2	CACCCGGCUGUGUGCACAUGUGC	-2.71429	0.461969	0.788403	down	2.33333	6.33333	3		1		15	1
hsa-miR-941	hsa-mir-941-3	CACCCGGCUGUGUGCACAUGUGC	-2.71429	0.461969	0.788403	down	2.33333	6.33333	3		1		15	1
hsa-miR-941	hsa-mir-941-4	CACCCGGCUGUGUGCACAUGUGC	-2.71429	0.461969	0.788403	down	2.33333	6.33333	3		1		15	1
hsa-miR-941	hsa-mir-941-5	CACCCGGCUGUGUGCACAUGUGC	-2.71429	0.461969	0.788403	down	2.33333	6.33333	3		1		15	1
hsa-miR-95-3p	hsa-mir-95	UUCAACGGGUAUUUAUUGAGCA	-2.33333	0.303548	0.746892	down	2	4.66667		3		4	7
hsa-miR-99b-3p	hsa-mir-99b	CAAGCUCGUGUCUGUGGGUCCG	-3.33871	0.425658	0.778835	down	20.6667	69	22	15	22	13	14	177
hsa-miR-novel-chr10_1393	hsa-mir-novel-chr10_1393	UUUGGAGUUGUAGUGAAAGU	-5.66667	0.373901	0.746892	down	1	5.66667					14
hsa-miR-novel-chr10_266	hsa-mir-novel-chr10_266	CUCACUUUGUAGACCAGGCUG	-3.5	0.416478	0.774194	down	1.33333	4.66667			1	11
hsa-miR-novel-chr10_535	hsa-mir-novel-chr10_535	UACCCAGAGGAAAGGACA	-2.66667	0.373901	0.746892	down	1	2.66667					5
hsa-miR-novel-chr10_602	hsa-mir-novel-chr10_602	GCGGCUGGACGAGGCGC	-24.8052	0.145995	0.746892	down	89	2207.67	118	54	92	2594	4022	4
hsa-miR-novel-chr11_1785	hsa-mir-novel-chr11_1785	GCGGGCGUGGGGGUGGGUGC	-4	0.373901	0.746892	down	1	4				9
hsa-miR-novel-chr11_1787	hsa-mir-novel-chr11_1787	AUAAGACAUGGGGAGCU	-16.0132	0.287577	0.746892	down	25.3333	405.667	8	46	19	1017	184	13
hsa-miR-novel-chr11_2152	hsa-mir-novel-chr11_2152	CCUGCCUGGAGCACUGUCC	-6.33333	0.373901	0.746892	down	1	6.33333				16
hsa-miR-novel-chr11_3002	hsa-mir-novel-chr11_3002	AAGGGCAGCACUGACACA	-21.6667	0.297875	0.746892	down	1	21.6667				7	55	0
hsa-miR-novel-chr12_3997	hsa-mir-novel-chr12_3997	AGGGCCCUGGGGAGGAGC	-8.66667	0.22617	0.746892	down	1	8.66667				18	5
hsa-miR-novel-chr12_4146	hsa-mir-novel-chr12_4146	AAAGCAAAUGUUGGGUGAACGGC	-2.66667	0.448593	0.785277	down	2	5.33333		3			12	1
hsa-miR-novel-chr12_4540	hsa-mir-novel-chr12_4540	UUGUUGGUGGGGUAAUG	-35.8	0.352732	0.746892	down	1.66667	59.6667		2		7	169	0
hsa-miR-novel-chr12_4881	hsa-mir-novel-chr12_4881	GUGGCUGGAGAGUUGGUUG	-6.33333	0.373901	0.746892	down	1	6.33333				16
hsa-miR-novel-chr12_5145	hsa-mir-novel-chr12_5145	GCUGGGGCGAGGACGGCGC	-7.66667	0.373901	0.746892	down	1	7.66667				20
hsa-miR-novel-chr14_7115	hsa-mir-novel-chr14_7115	AGGUGGUGCUGCUGGGGC	-10.6667	0.373901	0.746892	down	1	10.6667					29
hsa-miR-novel-chr15_8128	hsa-mir-novel-chr15_8128	AGGGAAGCUGACUGAGGC	-5.66667	0.419467	0.774194	down	2	11.3333	3				31
hsa-miR-novel-chr15_8147	hsa-mir-novel-chr15_8147	UUGGGACUGGCUCAGAG	-6.33333	0.373901	0.746892	down	1	6.33333				16		0
hsa-miR-novel-chr15_8495	hsa-mir-novel-chr15_8495	UUCCUGGCUGGUGCACC	-3.33333	0.373901	0.746892	down	1	3.33333				7
hsa-miR-novel-chr15_8822	hsa-mir-novel-chr15_8822	CUGAUUGGUGGGAUCCCC	-3.66667	0.289477	0.746892	down	1	3.66667				7		1
hsa-miR-novel-chr16_9991	hsa-mir-novel-chr16_9991	AGGGACAGUGCCUGGUG	-39.4483	0.363672	0.746892	down	9.66667	381.333	24		2	18	1106	17
hsa-miR-novel-chr17_10615	hsa-mir-novel-chr17_10615	UUUGGGGAUUCUAAGAGGAAG	-2.54545	0.238081	0.746892	down	7.33333	18.6667	4	15		25	24	4
hsa-miR-novel-chr17_10765	hsa-mir-novel-chr17_10765	CUGCUGUGAUGACAUUC	-2.2	0.53908	0.837172	down	3.33333	7.33333	3	4		18		1
hsa-miR-novel-chr17_10858	hsa-mir-novel-chr17_10858	ACGGUCUGGGGAAAGGCUCCU	-84.9	0.218407	0.746892	down	6.66667	566	10		7	397	1297	1
hsa-miR-novel-chr17_11355	hsa-mir-novel-chr17_11355	GAGGUGCGUGGCUGGGGC	-5.33333	0.373901	0.746892	down	1	5.33333				13
hsa-miR-novel-chr17_11455	hsa-mir-novel-chr17_11455	UACCCUGUAGAUCCGAAUUUGU	-4.15179	0.00293501	0.746892	down	37.3333	155	28	63	18	165	167	130
hsa-miR-novel-chr17_11655	hsa-mir-novel-chr17_11655	UCUGGGGAGUGUGUGUGAUAG	-4.33333	0.306809	0.746892	down	1	4.33333				9		1
hsa-miR-novel-chr18_11993	hsa-mir-novel-chr18_11993	UGGGGUUGUGGGGUCUGG	-5.66667	0.116117	0.746892	down	1	5.66667				7	7
hsa-miR-novel-chr18_12079	hsa-mir-novel-chr18_12079	GGUGGGGGCGCGCGGGC	-4.83333	0.187111	0.746892	down	6	29	3		12	43	41
hsa-miR-novel-chr18_12250	hsa-mir-novel-chr18_12250	UGGAAUGUAAAGAAGUAUGUAU	-5.19634	0.14721	0.746892	down	2660.33	13824	1453	5028	1497	19258	20580	1631
hsa-miR-novel-chr18_12453	hsa-mir-novel-chr18_12453	UGCGAAUGCAGACAUGAG	-7.66667	0.373901	0.746892	down	1	7.66667				20		0
hsa-miR-novel-chr18_12515	hsa-mir-novel-chr18_12515	AAGGCUCUGUGGGAGGAU	-14	0.158302	0.746892	down	1	14				13	26
hsa-miR-novel-chr19_12768	hsa-mir-novel-chr19_12768	AACAUUCAUUGUUGUCGGUGG	-2.77407	0.547257	0.841498	down	90	249.667	31	13	223	19	11	716
hsa-miR-novel-chr19_12826	hsa-mir-novel-chr19_12826	AGGCUGGAGUGCAGUGGC	-3	0.373901	0.746892	down	1	3					6
hsa-miR-novel-chr19_13225	hsa-mir-novel-chr19_13225	GUGAGUGAAGAAGGUCU	-4.33333	0.373901	0.746892	down	1	4.33333					10
hsa-miR-novel-chr19_13276	hsa-mir-novel-chr19_13276	GCGGAAAGGGGGGCGGU	-115.964	0.121231	0.746892	down	18.6667	2164.67	10	17	26	3543	2944	4
hsa-miR-novel-chr19_13300	hsa-mir-novel-chr19_13300	AGUGGGUGCUUGAGGAGAGA	-7.66667	0.373901	0.746892	down	1	7.66667				20
hsa-miR-novel-chr19_13407	hsa-mir-novel-chr19_13407	GUGAGUGGAGCUGAAGGGGAGGA	-7.33333	0.117217	0.746892	down	1	7.33333				9	10
hsa-miR-novel-chr19_13535	hsa-mir-novel-chr19_13535	GGGAAGGUGGCUCGGGG	-3.07083	0.267368	0.746892	down	80	245.667	113	14	110	287	436	11
hsa-miR-novel-chr19_13751	hsa-mir-novel-chr19_13751	ACUGCACUCCAGCCUGGGC	-5.75	0.379419	0.754598	down	6.66667	38.3333	10		7	101	10	1
hsa-miR-novel-chr19_13779	hsa-mir-novel-chr19_13779	CGGCUGAGGUGGGAUCCC	-20.6667	0.192101	0.746892	down	1	20.6667				16	43
hsa-miR-novel-chr1_14098	hsa-mir-novel-chr1_14098	GGGGAGACUGGAAUUCCUG	-256.786	0.371982	0.746892	down	4.66667	1198.33	10		1	16	3574	2
hsa-miR-novel-chr1_14269	hsa-mir-novel-chr1_14269	CCAGGCUGGUGUGCUCUCUGGUG	-4.33333	0.373901	0.746892	down	1	4.33333					10
hsa-miR-novel-chr1_14771	hsa-mir-novel-chr1_14771	AAAAGCUGGGUUGAGAGGGC	-15.875	0.201421	0.746892	down	16	254	9	30	6	551	182	26
hsa-miR-novel-chr1_15325	hsa-mir-novel-chr1_15325	GCUGCUGGCAGGACUGGC	-3	0.373901	0.746892	down	1	3					6
hsa-miR-novel-chr1_15326	hsa-mir-novel-chr1_15326	GCUGCUGGCAGGACUGGC	-3	0.373901	0.746892	down	1	3					6
hsa-miR-novel-chr1_15846	hsa-mir-novel-chr1_15846	UCACUCUAGGGUUGGGGACAGU	-5.33333	0.373901	0.746892	down	1	5.33333				13
hsa-miR-novel-chr1_15933	hsa-mir-novel-chr1_15933	GAAAGACUUUGACAGCGCA	-6.33333	0.373901	0.746892	down	1	6.33333				16
hsa-miR-novel-chr1_16513	hsa-mir-novel-chr1_16513	GGGACCCAGAAGGAGAGC	-3.66667	0.373901	0.746892	down	1	3.66667					8
hsa-miR-novel-chr1_16514	hsa-mir-novel-chr1_16514	GGGACCCAGAAGGAGAGC	-3.66667	0.373901	0.746892	down	1	3.66667					8
hsa-miR-novel-chr1_17005	hsa-mir-novel-chr1_17005	AACAUUCAUUGCUGUCGGUGG	-3.4258	0.50129	0.807408	down	188.667	646.333	118	46	399	55	15	1866
hsa-miR-novel-chr1_17007	hsa-mir-novel-chr1_17007	AACAUUCAACGCUGUCGGUGA	-2.38328	0.49547	0.804416	down	211.333	503.667	180	68	383	135	112	1261
hsa-miR-novel-chr1_17071	hsa-mir-novel-chr1_17071	GGAGGAGGAGAAAGAGAC	-4.33333	0.373901	0.746892	down	1	4.33333					10
hsa-miR-novel-chr1_17194	hsa-mir-novel-chr1_17194	AAAAGCUGGGUUGAGAGGGC	-15.875	0.201421	0.746892	down	16	254	9	30	6	551	182	26
hsa-miR-novel-chr1_17337	hsa-mir-novel-chr1_17337	UCUCUGGGCUGUUACUG	-7	0.373901	0.746892	down	1	7				18
hsa-miR-novel-chr20_17674	hsa-mir-novel-chr20_17674	AGGAGCACGGCUGGAUAG	-2.62963	0.564873	0.847133	down	9	23.6667	23		1		67	1
hsa-miR-novel-chr20_17815	hsa-mir-novel-chr20_17815	AGUGGCUGGAUGGCAAGC	-6.33333	0.373901	0.746892	down	1	6.33333				16
hsa-miR-novel-chr20_17913	hsa-mir-novel-chr20_17913	UUGGUCCCCUUCAACCAGCUGU	-3.51485	0.0288336	0.746892	down	33.6667	118.333	18	28	52	144	137	71
hsa-miR-novel-chr20_18217	hsa-mir-novel-chr20_18217	UUUCCCUUCAGAGCCUGGCUU	-3.66667	0.289477	0.746892	down	1	3.66667				7		1
hsa-miR-novel-chr20_18271	hsa-mir-novel-chr20_18271	GGGGCGCGCGGGCUGGGC	-3.5	0.180077	0.746892	down	1.33333	4.66667			1	4	7
hsa-miR-novel-chr20_18292	hsa-mir-novel-chr20_18292	UGGGCACUGGGUAGAGG	-8	0.373901	0.746892	down	1	8					21
hsa-miR-novel-chr20_18380	hsa-mir-novel-chr20_18380	CCGGAUCGCGGAGCCGCG	-7.33333	0.373901	0.746892	down	1	7.33333					19
hsa-miR-novel-chr21_18975	hsa-mir-novel-chr21_18975	UCUCUGGGCCUGUGUCUU	-2.4	0.489982	0.802945	down	1.66667	4			2			9
hsa-miR-novel-chr21_18976	hsa-mir-novel-chr21_18976	UCUCUGGGCCUGUGUCUU	-2.4	0.489982	0.802945	down	1.66667	4			2			9
hsa-miR-novel-chr21_19107	hsa-mir-novel-chr21_19107	CGGGGGGCGGGGCGGAC	-11.8158	0.157812	0.746892	down	12.6667	149.667	13	1	21	270	175	1
hsa-miR-novel-chr21_19108	hsa-mir-novel-chr21_19108	CGGGGGGCGGGGCGGAC	-11.8158	0.157812	0.746892	down	12.6667	149.667	13	1	21	270	175	1
hsa-miR-novel-chr22_19694	hsa-mir-novel-chr22_19694	GGAGGAAUGGCAGAGCGG	-7	0.373901	0.746892	down	1	7				18
hsa-miR-novel-chr22_19983	hsa-mir-novel-chr22_19983	GACUGACUGGCUGGCUAGU	-7.33333	0.373901	0.746892	down	1	7.33333					19
hsa-miR-novel-chr22_20059	hsa-mir-novel-chr22_20059	AGAGGAGGAAGAGAGAGC	-5.66667	0.373901	0.746892	down	1	5.66667					14
hsa-miR-novel-chr2_21366	hsa-mir-novel-chr2_21366	UACCCUGUAGAACCGAAUUUGU	-3.78027	0.0376591	0.746892	down	74.3333	281	85	82	53	402	266	172
hsa-miR-novel-chr2_21492	hsa-mir-novel-chr2_21492	AGCUGGGUUCAGAACGU	-3.85542	0.21865	0.746892	down	27.6667	106.667	59	19	2	150	164	3
hsa-miR-novel-chr2_22272	hsa-mir-novel-chr2_22272	CGGGCGUGGGGGUGGGGGC	-254.667	0.371358	0.746892	down	2	509.333		2	1	1517	7	1
hsa-miR-novel-chr2_22885	hsa-mir-novel-chr2_22885	GGCGUGGGGGUGGGGGC	-5.33333	0.373901	0.746892	down	1	5.33333				13
hsa-miR-novel-chr2_23119	hsa-mir-novel-chr2_23119	AGUGGGGCUGGGUGGGGC	-7	0.222983	0.746892	down	1	7				4	14
hsa-miR-novel-chr2_23245	hsa-mir-novel-chr2_23245	AGGAGCAGUGGAAGGAGC	-8.66667	0.116868	0.746892	down	1	8.66667				11	12
hsa-miR-novel-chr3_23313	hsa-mir-novel-chr3_23313	GCUUCCUGGGUCUGGCUGCUGCC	-6.66667	0.373901	0.746892	down	1	6.66667					17
hsa-miR-novel-chr3_24142	hsa-mir-novel-chr3_24142	CAGGAAGAAAGCCAAGGA	-5.33333	0.373901	0.746892	down	1	5.33333				13
hsa-miR-novel-chr3_24314	hsa-mir-novel-chr3_24314	AAAGCAGGAUUCAGACUACA	-2.375	0.364843	0.746892	down	2.66667	6.33333		5		11	5
hsa-miR-novel-chr3_24465	hsa-mir-novel-chr3_24465	ACUGAGGGGAUGAAGGAUCAGGC	-2.66667	0.237796	0.746892	down	1	2.66667				4		1
hsa-miR-novel-chr3_25421	hsa-mir-novel-chr3_25421	AGCUUGACUGUGAGACUG	-4.30769	0.0763133	0.746892	down	8.66667	37.3333	10	11	2	13	50	46
hsa-miR-novel-chr4_25501	hsa-mir-novel-chr4_25501	GGGGGCGGGUCGGGGGU	-50.3333	0.373901	0.746892	down	1	50.3333				148		0
hsa-miR-novel-chr4_25696	hsa-mir-novel-chr4_25696	GCGGGCGGGGACGCGGGC	-7.66667	0.373901	0.746892	down	1	7.66667				20
hsa-miR-novel-chr4_26334	hsa-mir-novel-chr4_26334	CGGUGGGGAAGGUGGCU	-19.5789	0.384177	0.755509	down	6.33333	124	3	5	8	364	5
hsa-miR-novel-chr5_28105	hsa-mir-novel-chr5_28105	UGAGAUGAAGCACUGUAGCUCA	-2.16058	0.291067	0.746892	down	91.3333	197.333	48	59	164	249	299	41
hsa-miR-novel-chr5_28135	hsa-mir-novel-chr5_28135	GAUGUUGGCUCAGAAGCA	-4.66667	0.373901	0.746892	down	1	4.66667				11
hsa-miR-novel-chr5_28276	hsa-mir-novel-chr5_28276	CGCUUGCUGGAUCUGUGCUGUGC	-7.66667	0.340953	0.746892	down	1	7.66667					19	1
hsa-miR-novel-chr5_28496	hsa-mir-novel-chr5_28496	GAAACUGCUGAGCUUGAGUG	-10.6667	0.373901	0.746892	down	1	10.6667					29
hsa-miR-novel-chr5_28579	hsa-mir-novel-chr5_28579	CGGGGGCGGGCGGGCGU	-49	0.373901	0.746892	down	1	49				144
hsa-miR-novel-chr5_28782	hsa-mir-novel-chr5_28782	GAGGCUGGAGAGAUGGCU	-9	0.373901	0.746892	down	1	9					24
hsa-miR-novel-chr5_29164	hsa-mir-novel-chr5_29164	AGAAGUGCUGCGGAAGGACC	-3.5	0.457253	0.788403	down	2	7	3			18
hsa-miR-novel-chr5_29215	hsa-mir-novel-chr5_29215	GCCGGUAGGUGUAGGCGCAGC	-6.42857	0.442391	0.784977	down	16.3333	105	18	22	6		312	0
hsa-miR-novel-chr5_29267	hsa-mir-novel-chr5_29267	GGAGGAGGAGAAAGAGAC	-4.33333	0.373901	0.746892	down	1	4.33333					10
hsa-miR-novel-chr6_30157	hsa-mir-novel-chr6_30157	GGGGCUGGAGAGGUGGCU	-6.33333	0.246276	0.746892	down	1	6.33333				3	13	0
hsa-miR-novel-chr6_30158	hsa-mir-novel-chr6_30158	GGGGCUGGAGAGGUGGCU	-6.33333	0.246276	0.746892	down	1	6.33333				3	13	0
hsa-miR-novel-chr6_30942	hsa-mir-novel-chr6_30942	GCGGCGCGCGGGCGGGGC	-18.3333	0.373901	0.746892	down	1	18.3333					52
hsa-miR-novel-chr6_30957	hsa-mir-novel-chr6_30957	UGCUGUGGCUGGGGUGGU	-5.66667	0.373901	0.746892	down	1	5.66667					14
hsa-miR-novel-chr7_32202	hsa-mir-novel-chr7_32202	AGAGGAGGAGAGAAGAAU	-5.66667	0.373901	0.746892	down	1	5.66667					14
hsa-miR-novel-chr7_33401	hsa-mir-novel-chr7_33401	AAGGUGCUGCAUGGCUG	-2.6	0.476621	0.793615	down	1.66667	4.33333			2		10
hsa-miR-novel-chr7_33431	hsa-mir-novel-chr7_33431	CCACUGCUGAAUAUAUAG	-7.33333	0.373901	0.746892	down	1	7.33333					19	0
hsa-miR-novel-chr8_33741	hsa-mir-novel-chr8_33741	AAAAGCUGGGUUGAGAGG	-4.66667	0.250158	0.746892	down	1	4.66667				9		2
hsa-miR-novel-chr8_34113	hsa-mir-novel-chr8_34113	GGCUGGUCCGAUGGUAGU	-5.1306	0.246586	0.746892	down	89.3333	458.333	88	171	6	963	358	51
hsa-miR-novel-chr8_34300	hsa-mir-novel-chr8_34300	GGGACACAGGUGCUGCA	-7.875	0.145312	0.746892	down	2.66667	21	5			29	31	0
hsa-miR-novel-chr8_34303	hsa-mir-novel-chr8_34303	AGGGUUGGGUGGAGGCU	-2.33333	0.373901	0.746892	down	1	2.33333				4
hsa-miR-novel-chr8_34627	hsa-mir-novel-chr8_34627	AGGUGGGAGACUGUGAAA	-5	0.373901	0.746892	down	1	5					12
hsa-miR-novel-chr9_35792	hsa-mir-novel-chr9_35792	AACAUUCAACGCUGUCGGUGA	-2.38328	0.49547	0.804416	down	211.333	503.667	180	68	383	135	112	1261
hsa-miR-novel-chr9_36429	hsa-mir-novel-chr9_36429	AGCCUGCCUGACUGUGA	-3.33333	0.373901	0.746892	down	1	3.33333					7
hsa-miR-novel-chr9_36459	hsa-mir-novel-chr9_36459	CUGGUCCAGGGACAGUG	-5.66667	0.373901	0.746892	down	1	5.66667					14
hsa-miR-novel-chr9_36602	hsa-mir-novel-chr9_36602	ACAGUAGUCUGCACAUUGGUU	-3.14667	0.182373	0.746892	down	50	157.333	30	60	57	232	212	25
hsa-miR-novel-chr9_36701	hsa-mir-novel-chr9_36701	CGGGCUGGGGCGGGAAGC	-3.66667	0.116117	0.746892	down	1	3.66667				4	4
hsa-miR-novel-chr9_36702	hsa-mir-novel-chr9_36702	CGGGCUGGGGCGGGAAGC	-3.66667	0.116117	0.746892	down	1	3.66667				4	4
hsa-miR-novel-chrX_37926	hsa-mir-novel-chrX_37926	AGCUACAUUGUCUGCUGGGUUUC	-2.42415	0.405373	0.770397	down	226.333	548.667	201	117	358	273	147	1223
hsa-miR-novel-chrX_37932	hsa-mir-novel-chrX_37932	UUCUGUACUGUGGAAGC	-5.66667	0.373901	0.746892	down	1	5.66667					14

## Sheet: up.paired.H_vs_S
miRNA expression for H vs S Fold Change cutoff: 2.0 P-value cutoff: 1.0 Column A: Mature miRNA, the mature miRNA name. Column B: Pre-miRNA, the pre-miRNA name. Column C: Sequence, the mature miRNA sequence. Column D: Fold change, Fold change between two groups. Column E: P-value, P-value is calculated by paired t-test. Column F: FDR, BH-adjusted P-value. Column G: Regulation, 'up' indicates up-re…
miRNA Information			Statistics & Regulation				Mean		Tag counts (normalized)
mature-miRNA	pre-miRNA	mature-sequence	Fold Change	P-value	FDR	Regulation	group H	group S	H-1	H-2	H-3	S-1	S-2	S-3
hsa-let-7a-5p	hsa-let-7a-1	UGAGGUAGUAGGUUGUAUAGUU	3.24986	0.207681	0.719487	up	3741.67	1151.33	3324	1046	6852	1065	716	1670
hsa-miR-21-5p	hsa-mir-21	UAGCUUAUCAGACUGAUGUUGA	7.69943	0.329085	0.719487	up	22977.7	2984.33	35429	18241	15260	3289	2062	3602
hsa-let-7b-5p	hsa-let-7b	UGAGGUAGUAGGUUGUGUGGUU	2.01241	0.284341	0.719487	up	7462	3708	4613	5664	12106	1559	6006	3556
hsa-miR-26b-5p	hsa-mir-26b	UUCAAGUAAUUCAGGAUAGGU	3.63376	0.318037	0.719487	up	4686.33	1289.67	4020	1800	8236	433	2957	476
hsa-miR-30d-5p	hsa-mir-30d	UGUAAACAUCCCCGACUGGAAG	2.24857	0.278184	0.719487	up	3799.33	1689.67	5506	3620	2269	687	2070	2309
hsa-miR-320a	hsa-mir-320a	AAAAGCUGGGUUGAGAGGGCGA	3.44997	0.145659	0.719487	up	3746.67	1086	2831	3042	5364	569	2134	552
hsa-let-7a-5p	hsa-let-7a-2	UGAGGUAGUAGGUUGUAUAGUU	3.24986	0.207681	0.719487	up	3741.67	1151.33	3324	1046	6852	1065	716	1670
hsa-let-7a-5p	hsa-let-7a-3	UGAGGUAGUAGGUUGUAUAGUU	3.24986	0.207681	0.719487	up	3741.67	1151.33	3324	1046	6852	1065	716	1670
hsa-miR-128-3p	hsa-mir-128-1	UCACAGUGAACCGGUCUCUUU	2.27509	0.640714	0.924447	up	2660.33	1169.33	7749	58	171	887	324	2294
hsa-miR-128-3p	hsa-mir-128-2	UCACAGUGAACCGGUCUCUUU	2.27509	0.640714	0.924447	up	2660.33	1169.33	7749	58	171	887	324	2294
hsa-miR-363-3p	hsa-mir-363	AAUUGCACGGUAUCCAUCUGUA	5.26297	0.262694	0.719487	up	1487.67	282.667	985	783	2692	86	751	8
hsa-miR-novel-chr8_34113	hsa-mir-novel-chr8_34113	GGCUGGUCCGAUGGUAGU	10.5112	0.40659	0.719487	up	939	89.3333	159	170	2485	88	171	6
hsa-miR-423-5p	hsa-mir-423	UGAGGGGCAGAGAGCGAGACUUU	2.08658	0.242912	0.719487	up	642.667	308	646	484	795	325	496	100
hsa-miR-144-5p	hsa-mir-144	GGAUAUCAUCAUAUACUGUAAG	27.8704	0.0131	0.719487	up	501.667	18	371	406	728	23	21	10
hsa-miR-novel-chr1_17005	hsa-mir-novel-chr1_17005	AACAUUCAUUGCUGUCGGUGG	2.16254	0.661157	0.938014	up	408	188.667	1174	24	23	118	46	399
hsa-miR-15b-5p	hsa-mir-15b	UAGCAGCACAUCAUGGUUUACA	6.99296	0.20598	0.719487	up	331	47.3333	238	168	584	29	105	5
hsa-miR-652-3p	hsa-mir-652	AAUGGCGCCACUAGGGUUGUG	2.27635	0.263424	0.719487	up	324	142.333	256	258	455	39	296	89
hsa-miR-433-3p	hsa-mir-433	AUCAUGAUGGGCUCCUCGGUGU	2.15829	0.656391	0.938014	up	286.333	132.667	831	4	21	97	31	267
hsa-miR-182-5p	hsa-mir-182	UUUGGCAAUGGUAGAACUCACACU	4.13736	0.337324	0.719487	up	251	60.6667	168	102	480	19	152	8
hsa-miR-155-5p	hsa-mir-155	UUAAUGCUAAUCGUGAUAGGGGU	5.49138	0.313503	0.719487	up	212.333	38.6667	467	84	83	35	66	12
hsa-miR-novel-chr17_11455	hsa-mir-novel-chr17_11455	UACCCUGUAGAUCCGAAUUUGU	4.90179	0.336564	0.719487	up	183	37.3333	57	441	48	28	63	18
hsa-let-7d-3p	hsa-let-7d	CUAUACGACCUGCUGCCUUUCU	2.45116	0.58832	0.886128	up	175.667	71.6667	477	17	30	53	21	138
hsa-miR-142-5p	hsa-mir-142	CAUAAAGUAGAAAGCACUACU	3.2284	0.323019	0.719487	up	174.333	54	165	95	260	5	151	3
hsa-miR-novel-chr20_18399	hsa-mir-novel-chr20_18399	UGAGGUAGUAGUUUGUG	10.9318	0.072801	0.719487	up	160.333	14.6667	120	127	231	5	33	3
hsa-miR-novel-chr4_26719	hsa-mir-novel-chr4_26719	UGAAAUGACUUGAGAGG	58.625	0.275396	0.719487	up	156.333	2.66667	40	65	361		4	1
hsa-miR-1246	hsa-mir-1246	AAUGGAUUUUUGGAGCAGG	19.5	0.104755	0.719487	up	104	5.33333	34	151	124	4	9
hsa-miR-425-5p	hsa-mir-425	AAUGACACGAUCACUCCCGUUGA	2.29293	0.166544	0.719487	up	75.6667	33	49	80	95	10	70	16
hsa-miR-484	hsa-mir-484	UCAGGCUCAGUCCCCUCCCGAU	2.75	0.100343	0.719487	up	73.3333	26.6667	114	70	33	44	16	17
hsa-miR-342-5p	hsa-mir-342	AGGGGUGCUAUCUGUGAUUGA	3.40625	0.318357	0.719487	up	72.6667	21.3333	140	34	41	11	16	34
hsa-miR-16-2-3p	hsa-mir-16-2	CCAAUAUUACUGUGCUGCUUUA	5.18182	0.373826	0.719487	up	57	11	25	16	127	3	25	2
hsa-miR-142-3p	hsa-mir-142	UGUAGUGUUUCCUACUUUAUGGA	2.15278	0.398503	0.719487	up	51.6667	24	69	13	70	26	36	7
hsa-miR-15b-3p	hsa-mir-15b	CGAAUCAUUAUUUGCUGCUCUA	3.7	0.392241	0.719487	up	49.3333	13.3333	27	19	99	4	33
hsa-miR-361-3p	hsa-mir-361	UCCCCCAGGUGUGAUUCUGAUUU	2.94286	0.411867	0.719487	up	34.3333	11.6667	77	13	10	11	5	16
hsa-miR-32-5p	hsa-mir-32	UAUUGCACAUUACUAAGUUGCA	2.18182	0.347959	0.719487	up	32	14.6667	31	22	40	7	32	2
hsa-miR-4732-5p	hsa-mir-4732	UGUAGAGCAGGGAGCAGGAAGCU	2.8	0.310299	0.719487	up	23.3333	8.33333	9	21	37	8	14
hsa-miR-338-5p	hsa-mir-338	AACAAUAUCCUGGUGCUGAGUG	3.82353	0.479428	0.781961	up	21.6667	5.66667	56		6	3		11
hsa-miR-novel-chr17_10615	hsa-mir-novel-chr17_10615	UUUGGGGAUUCUAAGAGGAAG	2.63636	0.0760114	0.719487	up	19.3333	7.33333	13	23	19	4	15
hsa-miR-760	hsa-mir-760	CGGCUCUGGGUCUGUGGGGA	2.88889	0.486262	0.789816	up	17.3333	6	48	0	1	10		5
hsa-miR-335-5p	hsa-mir-335	UCAAGAGCAAUAACGAAAAAUGU	2.22727	0.616122	0.915429	up	16.3333	7.33333	38	3	5			19
hsa-miR-novel-chr15_8822	hsa-mir-novel-chr15_8822	CUGAUUGGUGGGAUCCCC	15	0.132868	0.719487	up	15	1	11	6	25
hsa-miR-novel-chr3_24314	hsa-mir-novel-chr3_24314	AAAGCAGGAUUCAGACUACA	4.875	0.0162447	0.719487	up	13	2.66667	9	14	13		5
hsa-miR-2110	hsa-mir-2110	UUGGGGAAACGGCCGCUGAGUG	7.2	0.139884	0.719487	up	12	1.66667	3	12	18		2
hsa-miR-1255b-5p	hsa-mir-1255b-1	CGGAUGAGCAAAGAAAGUGGUU	2.69231	0.395841	0.719487	up	11.6667	4.33333	3	8	21	2	8
hsa-miR-1255b-5p	hsa-mir-1255b-2	CGGAUGAGCAAAGAAAGUGGUU	2.69231	0.395841	0.719487	up	11.6667	4.33333	3	8	21	2	8
hsa-miR-454-3p	hsa-mir-454	UAGUGCAAUAUUGCUUAUAGGGU	2.83333	0.419037	0.719487	up	11.3333	4	9	3	19		9
hsa-miR-novel-chr17_11560	hsa-mir-novel-chr17_11560	UAGUGCAAUAUUGCUUAUAGGGU	2.83333	0.419037	0.719487	up	11.3333	4	9	3	19		9
hsa-miR-200b-5p	hsa-mir-200b	CAUCUUACUGGGCAGCAUUGGA	2.35714	0.656695	0.938014	up	11	4.66667	30	0				11
hsa-miR-novel-chr12_4146	hsa-mir-novel-chr12_4146	AAAGCAAAUGUUGGGUGAACGGC	5	0.218038	0.719487	up	10	2	3	7	17		3
hsa-miR-1304-5p	hsa-mir-1304	UUUGAGGCUACAGUGAGAUGUG	8.33333	0.232662	0.719487	up	8.33333	1	0	7	15
hsa-miR-212-5p	hsa-mir-212	ACCUUGGCUCUAGACUGCUUACU	6.25	0.394539	0.719487	up	8.33333	1.33333	20	0	2			1
hsa-miR-362-5p	hsa-mir-362	AAUCCUUGGAACCUAGGUGUGAGU	2.66667	0.417448	0.719487	up	8	3	6	2	13		6
hsa-miR-532-3p	hsa-mir-532	CCUCCCACACCCAAGGCUUGCA	2.875	0.400958	0.719487	up	7.66667	2.66667	14	2	4		4	1
hsa-miR-novel-chr5_28146	hsa-mir-novel-chr5_28146	UGUGAGGUUGGCAUUGUUGU	3.14286	0.138273	0.719487	up	7.33333	2.33333	2	8	9		4
hsa-miR-1307-3p	hsa-mir-1307	ACUCGGCGUGGCGUCGGUCGUG	3.16667	0.0830507	0.719487	up	6.33333	2	6	3	7	3
hsa-miR-196b-5p	hsa-mir-196b	UAGGUAGUUUCCUGUUGUUGGG	2.71429	0.320634	0.719487	up	6.33333	2.33333	2	4	10		4
hsa-miR-novel-chr22_20108	hsa-mir-novel-chr22_20108	UUGAGGUCGGACAUGGUGGCU	6.33333	0.102765	0.719487	up	6.33333	1	3	9	4
hsa-miR-576-5p	hsa-mir-576	AUUCUAAUUUCUCCACGUCUUU	3	0.225403	0.719487	up	6	2	3	8	4	3
hsa-miR-novel-chr17_11138	hsa-mir-novel-chr17_11138	CCCACUGCUAAAUUUGAC	6	0.199359	0.719487	up	6	1	10	4	1
hsa-miR-3135a	hsa-mir-3135a	UGCCUAGGCUGAGACUGCAGUG	5.33333	0.213204	0.719487	up	5.33333	1	3	1	9
hsa-miR-483-5p	hsa-mir-483	AAGACGGGAGGAAAGAAGGGAG	2.66667	0.29986	0.719487	up	5.33333	2	2	2	9		2	1
hsa-miR-511-5p	hsa-mir-511	GUGUCUUUUGCUCUGCAGUCA	5.33333	0.237927	0.719487	up	5.33333	1	9	4
hsa-miR-942-5p	hsa-mir-942	UCUUCUCUGUUUUGGCCAUGUG	5.33333	0.267533	0.719487	up	5.33333	1	1	2	10
hsa-miR-novel-chr10_218	hsa-mir-novel-chr10_218	CGCGGGUGCUUACUGACC	5.33333	0.0390123	0.719487	up	5.33333	1	4	6	3
hsa-miR-novel-chr11_2272	hsa-mir-novel-chr11_2272	AAAAGUACUUGCGGAUUUUG	2.66667	0.00985246	0.719487	up	5.33333	2	3	7	3		3
hsa-miR-novel-chr7_31754	hsa-mir-novel-chr7_31754	AGUGCCUGAGGGAGUAAGAGC	2.14286	0.269703	0.719487	up	5	2.33333	2	4	6		4
hsa-miR-novel-chr7_31774	hsa-mir-novel-chr7_31774	AGUGCCUGAGGGAGUAAGAGC	2.14286	0.269703	0.719487	up	5	2.33333	2	4	6		4
hsa-miR-204-3p	hsa-mir-204	GCUGGGAAGGCAAAGGGACGU	3.25	0.42265	0.719487	up	4.33333	1.33333	9		1			1
hsa-miR-410-5p	hsa-mir-410	AGGUUGUCUGUGAUGAGUUCG	3.25	0.482964	0.785621	up	4.33333	1.33333	10					1
hsa-miR-4732-3p	hsa-mir-4732	GCCCUGACCUGUCCUGUUCUG	4	0.188497	0.719487	up	4	1	1	6	2
hsa-miR-668-3p	hsa-mir-668	UGUCACUCGGCUCGGCCCACUAC	3	0.42265	0.719487	up	4	1.33333	8		1			1
hsa-miR-500a-3p	hsa-mir-500a	AUGCACCUGGGCAAGGAUUCUG	2.2	0.183503	0.719487	up	3.66667	1.66667	4	3	1		2
hsa-miR-628-3p	hsa-mir-628	UCUAGUAAGAGUGGCAGUCGA	2.2	0.320634	0.719487	up	3.66667	1.66667	1	2	5		2
hsa-miR-novel-chr1_13926	hsa-mir-novel-chr1_13926	AAGGGCAGGGCUCCCUGG	3.66667	0.346803	0.719487	up	3.66667	1		1	7
hsa-miR-novel-chr22_19498	hsa-mir-novel-chr22_19498	UGGUCCAACGACAGGAGUAGG	3.66667	0.346803	0.719487	up	3.66667	1		1	7
hsa-miR-1255a	hsa-mir-1255a	AGGAUGAGCAAAGAAAGUAGAUU	3.33333	0.118083	0.719487	up	3.33333	1	1	2	4
hsa-miR-4433b-5p	hsa-mir-4433b	AUGUCCCACCCCCACUCCUGU	3.33333	0.42265	0.719487	up	3.33333	1			7
hsa-miR-589-5p	hsa-mir-589	UGAGAACCACGUCUGCUCUGAG	3.33333	0.0198039	0.719487	up	3.33333	1	2	3	2
hsa-miR-novel-chr19_12896	hsa-mir-novel-chr19_12896	UGCCCUGAGACUUUUGCU	3.33333	0.118083	0.719487	up	3.33333	1	1	2	4
hsa-miR-novel-chr19_13779	hsa-mir-novel-chr19_13779	CGGCUGAGGUGGGAUCCC	3.33333	0.335589	0.719487	up	3.33333	1	1	0	6
hsa-miR-novel-chr5_27222	hsa-mir-novel-chr5_27222	CGGCGUGUGGACGGCCA	2.5	0.42265	0.719487	up	3.33333	1.33333	0		7			1
hsa-miR-18a-3p	hsa-mir-18a	ACUGCCCUAAGUGCUCCUUCUGG	3	0.183503	0.719487	up	3	1	1	1	4
hsa-miR-581	hsa-mir-581	UCUUGUGUUCUCUAGAUCAGU	3	0.0741799	0.719487	up	3	1	2	1	3
hsa-miR-novel-chr5_29117	hsa-mir-novel-chr5_29117	CUGGAGGAAGGCGGGGA	3	0.320634	0.719487	up	3	1	0	5	1
hsa-miR-novel-chr9_35897	hsa-mir-novel-chr9_35897	GCCCAGCUUGAGAAUCGG	3	0.42265	0.719487	up	3	1	0		6
hsa-miR-320b	hsa-mir-320b-1	AAAAGCUGGGUUGAGAGGGCAA	2	0.057191	0.719487	up	2.66667	1.33333	1	2	2		1
hsa-miR-320b	hsa-mir-320b-2	AAAAGCUGGGUUGAGAGGGCAA	2	0.057191	0.719487	up	2.66667	1.33333	1	2	2		1
hsa-miR-448	hsa-mir-448	UUGCAUAUGUAGGAUGUCCCAU	2	0.547089	0.847255	up	2.66667	1.33333	5					1
hsa-miR-novel-chr11_3690	hsa-mir-novel-chr11_3690	GGAUGUGCUGAUGGAGUC	2.66667	0.29986	0.719487	up	2.66667	1	0	1	4
hsa-miR-novel-chr12_4186	hsa-mir-novel-chr12_4186	UUUGGGACUGAUCUUGAUGUC	2.66667	0.129612	0.719487	up	2.66667	1	1	1	3
hsa-miR-novel-chr12_5121	hsa-mir-novel-chr12_5121	UUUGGGACUGAUCUUGAUGUC	2.66667	0.129612	0.719487	up	2.66667	1	1	1	3
hsa-miR-novel-chr14_7573	hsa-mir-novel-chr14_7573	UUUGAUGACUGUUCUUCCUGUU	2.66667	0.29986	0.719487	up	2.66667	1	0	1	4
hsa-miR-novel-chr17_10776	hsa-mir-novel-chr17_10776	ACUGGAGGAAGGUGGGG	2.66667	0.29986	0.719487	up	2.66667	1	1		4
hsa-miR-novel-chr1_15990	hsa-mir-novel-chr1_15990	UGAGGAUGGAUAGCAAGGAAG	2.66667	0.29986	0.719487	up	2.66667	1	0	1	4
hsa-miR-novel-chr3_24480	hsa-mir-novel-chr3_24480	GGGGCCGAGGGAGCGAGA	2.66667	0.0377496	0.719487	up	2.66667	1	1	2	2
hsa-miR-novel-chr8_33741	hsa-mir-novel-chr8_33741	AAAAGCUGGGUUGAGAGG	2.66667	0.129612	0.719487	up	2.66667	1	3	1	1
hsa-miR-190a-5p	hsa-mir-190a	UGAUAUGUUUGAUAUAUUAGGU	2.33333	0.269703	0.719487	up	2.33333	1	0	1	3
hsa-miR-193b-3p	hsa-mir-193b	AACUGGCCCUCAAAGUCCCGCU	2.33333	0.269703	0.719487	up	2.33333	1	3	1
hsa-miR-4659a-3p	hsa-mir-4659a	UUUCUUCUUAGACAUGGCAACG	2.33333	0.269703	0.719487	up	2.33333	1		1	3
hsa-miR-501-5p	hsa-mir-501	AAUCCUUUGUCCCUGGGUGAGA	2.33333	0.057191	0.719487	up	2.33333	1	1	1	2
hsa-miR-novel-chr11_2858	hsa-mir-novel-chr11_2858	UCUGGCUGAGGAGGAAGUGGA	2.33333	0.269703	0.719487	up	2.33333	1		1	3
hsa-miR-novel-chr15_8495	hsa-mir-novel-chr15_8495	UUCCUGGCUGGUGCACC	2.33333	0.42265	0.719487	up	2.33333	1	0		4
hsa-miR-novel-chr1_15417	hsa-mir-novel-chr1_15417	UUUGGCCUUUUAUGUUCUUGA	2.33333	0.269703	0.719487	up	2.33333	1		3	1
hsa-miR-novel-chr1_16507	hsa-mir-novel-chr1_16507	CGUGGUCUUCGGGGAGAGA	2.33333	0.057191	0.719487	up	2.33333	1	2	1	1
hsa-miR-novel-chr1_17151	hsa-mir-novel-chr1_17151	UGACCUAUGAAUUGACAG	2.33333	0.057191	0.719487	up	2.33333	1	1	2	1
hsa-miR-novel-chr21_19259	hsa-mir-novel-chr21_19259	GUGGGAGCUGGAAACAG	2.33333	0.269703	0.719487	up	2.33333	1	0	1	3
hsa-miR-novel-chr3_24465	hsa-mir-novel-chr3_24465	ACUGAGGGGAUGAAGGAUCAGGC	2.33333	0.42265	0.719487	up	2.33333	1	0	0	4
hsa-miR-novel-chr5_28276	hsa-mir-novel-chr5_28276	CGCUUGCUGGAUCUGUGCUGUGC	2.33333	0.42265	0.719487	up	2.33333	1			4
hsa-miR-novel-chr7_32898	hsa-mir-novel-chr7_32898	ACAUAUAGUGAAUUCUGGGAU	2.33333	0.057191	0.719487	up	2.33333	1	1	2	1
hsa-miR-novel-chr8_34509	hsa-mir-novel-chr8_34509	UCAGGCUCAGUCCCCUCC	2.33333	0.269703	0.719487	up	2.33333	1	3	1
hsa-miR-1224-5p	hsa-mir-1224	GUGAGGACUCGGGAGGUGG	2	0.225403	0.719487	up	2	1		1	2
hsa-miR-1266-5p	hsa-mir-1266	CCUCAGGGCUGUAGAACAGGGCU	2	0.42265	0.719487	up	2	1			3
hsa-miR-1270	hsa-mir-1270	CUGGAGAUAUGGAAGAGCUGUGU	2	0	0	up	2	1	1	1	1
hsa-miR-1271-5p	hsa-mir-1271	CUUGGCACCUAGCAAGCACUCA	2	0.225403	0.719487	up	2	1	2	1
hsa-miR-1296-5p	hsa-mir-1296	UUAGGGCCCUGGCUCCAUCUCC	2	0.225403	0.719487	up	2	1	1		2
hsa-miR-1301-3p	hsa-mir-1301	UUGCAGCUGCCUGGGAGUGACUUC	2	0.42265	0.719487	up	2	1	3
hsa-miR-146b-3p	hsa-mir-146b	UGCCCUGUGGACUCAGUUCUGG	2	0.225403	0.719487	up	2	1	2	1
hsa-miR-23a-5p	hsa-mir-23a	GGGGUUCCUGGGGAUGGGAUUU	2	0.225403	0.719487	up	2	1	1		2
hsa-miR-330-3p	hsa-mir-330	GCAAAGCACACGGCCUGCAGAGA	2	0	0	up	2	1	1	1	1
hsa-miR-424-5p	hsa-mir-424	CAGCAGCAAUUCAUGUUUUGAA	2	0.225403	0.719487	up	2	1		1	2
hsa-miR-4637	hsa-mir-4637	UACUAACUGCAGAUUCAAGUGA	2	0.225403	0.719487	up	2	1	1	2
hsa-miR-4677-3p	hsa-mir-4677	UCUGUGAGACCAAAGAACUACU	2	0	0	up	2	1	1	1	1
hsa-miR-4762-3p	hsa-mir-4762	CUUCUGAUCAAGAUUUGUGGUG	2	0.225403	0.719487	up	2	1		1	2
hsa-miR-7976	hsa-mir-7976	UGCCCUGAGACUUUUGCUC	2	0.225403	0.719487	up	2	1		1	2
hsa-miR-885-5p	hsa-mir-885	UCCAUUACACUACCCUGCCUCU	2	0.42265	0.719487	up	2	1			3
hsa-miR-novel-chr10_54	hsa-mir-novel-chr10_54	UUAAUAUGUACUGACAAAGCG	2	0.42265	0.719487	up	2	1		0	3
hsa-miR-novel-chr11_3002	hsa-mir-novel-chr11_3002	AAGGGCAGCACUGACACA	2	0.225403	0.719487	up	2	1	1	2
hsa-miR-novel-chr16_9494	hsa-mir-novel-chr16_9494	UCUGGGCACAGGCGGAUGGAC	2	0.42265	0.719487	up	2	1	0	0	3
hsa-miR-novel-chr16_9548	hsa-mir-novel-chr16_9548	GUGGGUACGGCCCAGUGGGGGGGAG	2	0.42265	0.719487	up	2	1	3
hsa-miR-novel-chr17_10867	hsa-mir-novel-chr17_10867	GAAGCAGCGCCUGUCGCAACUCG	2	0	0	up	2	1	1	1	1
hsa-miR-novel-chr22_20109	hsa-mir-novel-chr22_20109	GAUCCCAGGUCAAGGCUGCAGUG	2	0.42265	0.719487	up	2	1		0	3
hsa-miR-novel-chr2_21677	hsa-mir-novel-chr2_21677	CGAUGGGCAGAAGGGCAGCU	2	0.42265	0.719487	up	2	1			3
hsa-miR-novel-chr4_27003	hsa-mir-novel-chr4_27003	UGUGCCCUGAGACUGCUAAG	2	0.42265	0.719487	up	2	1		3
hsa-miR-novel-chr6_30245	hsa-mir-novel-chr6_30245	UUAAGGUCCCUGAGAAUGGCU	2	0	0	up	2	1	1	1	1
hsa-miR-novel-chr7_32726	hsa-mir-novel-chr7_32726	GGGGGCAGAGCUUGAUGUGG	2	0.42265	0.719487	up	2	1			3
hsa-miR-novel-chr9_36596	hsa-mir-novel-chr9_36596	GACUGGGACAGAUGUGCUU	2	0.225403	0.719487	up	2	1	1	0	2

## Sheet: dn.paired.H_vs_S
miRNA expression for H vs S Fold Change cutoff: 2.0 P-value cutoff: 1.0 Column A: Mature miRNA, the mature miRNA name. Column B: Pre-miRNA, the pre-miRNA name. Column C: Sequence, the mature miRNA sequence. Column D: Fold change, Fold change between two groups. Column E: P-value, P-value is calculated by paired t-test. Column F: FDR, BH-adjusted P-value. Column G: Regulation, 'up' indicates up-re…
miRNA Information			Statistics & Regulation				Mean		Tag counts (normalized)
mature-miRNA	pre-miRNA	mature-sequence	Fold Change	P-value	FDR	Regulation	group H	group S	H-1	H-2	H-3	S-1	S-2	S-3
hsa-miR-9-5p	hsa-mir-9-1	UCUUUGGUUAUCUAGCUGUAUGA	-6.42397	0.266955	0.719487	down	1313	8434.67	3678	51	207	8217	686	16398
hsa-miR-9-5p	hsa-mir-9-2	UCUUUGGUUAUCUAGCUGUAUGA	-6.42397	0.266955	0.719487	down	1313	8434.67	3678	51	207	8217	686	16398
hsa-miR-9-5p	hsa-mir-9-3	UCUUUGGUUAUCUAGCUGUAUGA	-6.42397	0.266955	0.719487	down	1313	8434.67	3678	51	207	8217	686	16398
hsa-miR-92a-3p	hsa-mir-92a-1	UAUUGCACUUGUCCCGGCCUGU	-2.06375	0.506922	0.81613	down	732	1510.67	628	1058	507	633	3767	129
hsa-miR-92a-3p	hsa-mir-92a-2	UAUUGCACUUGUCCCGGCCUGU	-2.06375	0.506922	0.81613	down	732	1510.67	628	1058	507	633	3767	129
hsa-miR-30c-5p	hsa-mir-30c-2	UGUAAACAUCCUACACUCUCAGC	-2.51015	0.480002	0.781961	down	607.667	1525.33	1250	109	461	708	411	3454
hsa-miR-30c-5p	hsa-mir-30c-1	UGUAAACAUCCUACACUCUCAGC	-2.51015	0.480002	0.781961	down	607.667	1525.33	1250	109	461	708	411	3454
hsa-miR-30b-5p	hsa-mir-30b	UGUAAACAUCCUACACUCAGCU	-2.58789	0.318124	0.719487	down	561.333	1452.67	598	112	971	422	818	3115
hsa-miR-27b-3p	hsa-mir-27b	UUCACAGUGGCUAAGUUCUGC	-2.2114	0.436631	0.736786	down	561.333	1241.33	1088	120	473	646	621	2454
hsa-miR-novel-chr14_6480	hsa-mir-novel-chr14_6480	CCUGUCUGAGCGUCGCU	-12.2188	0.351899	0.719487	down	559	6830.33	759	151	764	17449	1426	1613
hsa-miR-novel-chr22_19855	hsa-mir-novel-chr22_19855	CCUGUCUGAGCGUCGCU	-12.2188	0.351899	0.719487	down	559	6830.33	759	151	764	17449	1426	1613
hsa-miR-novel-chr3_23387	hsa-mir-novel-chr3_23387	CGGGUGCUGUAGGCUUU	-27.1941	0.173899	0.719487	down	362.333	9853.33	813	35	236	18134	1501	9922
hsa-miR-379-5p	hsa-mir-379	UGGUAGACUAUGGAACGUAGG	-4.01786	0.307833	0.719487	down	317.333	1275	851	18	80	1146	227	2449
hsa-miR-143-3p	hsa-mir-143	UGAGAUGAAGCACUGUAGCUC	-2.99598	0.2549	0.719487	down	249	746	337	78	329	341	483	1411
hsa-miR-181a-5p	hsa-mir-181a-2	AACAUUCAACGCUGUCGGUGAGU	-2.17143	0.376836	0.719487	down	221.667	481.333	512	44	106	421	220	800
hsa-miR-181a-5p	hsa-mir-181a-1	AACAUUCAACGCUGUCGGUGAGU	-2.17143	0.376836	0.719487	down	221.667	481.333	512	44	106	421	220	800
hsa-miR-381-3p	hsa-mir-381	UAUACAAGGGCAAGCUCUCUGU	-2.9504	0.525672	0.831516	down	208.333	614.667	552	14	56	146	228	1467
hsa-miR-152-3p	hsa-mir-152	UCAGUGCAUGACAGAACUUGG	-2.09751	0.517781	0.827545	down	160.667	337	323	108	48	93	314	601
hsa-miR-136-3p	hsa-mir-136	CAUCAUCGUCUCAAAUGAGUCU	-4.22246	0.521302	0.831516	down	157.333	664.333	459	3	7	116	66	1808
hsa-miR-206	hsa-mir-206	UGGAAUGUAAGGAAGUGUGUGG	-2.29493	0.589771	0.886128	down	144.667	332	397	5	29	170	37	786
hsa-miR-98-5p	hsa-mir-98	UGAGGUAGUAAGUUGUAUUGUU	-2.18	0.340583	0.719487	down	133.333	290.667	137	51	209	167	82	620
hsa-miR-200c-3p	hsa-mir-200c	UAAUACUGCCGGGUAAUGAUGGA	-2.00258	0.698058	0.949774	down	129	258.333	341	12	31	19	55	698
hsa-miR-708-5p	hsa-mir-708	AAGGAGCUUACAAUCUAGCUGGG	-3.95965	0.396355	0.719487	down	115.667	458	310	11	23	229	150	992
hsa-let-7e-5p	hsa-let-7e	UGAGGUAGGAGGUUGUAUAGUU	-5.64118	0.250012	0.719487	down	113.333	639.333	219	14	104	463	168	1284
hsa-miR-139-5p	hsa-mir-139	UCUACAGUGCACGUGUCUCCAGU	-5.13684	0.463784	0.766413	down	95	488	241	8	33	99	69	1293
hsa-miR-369-3p	hsa-mir-369	AAUAAUACAUGGUUGAUCUUU	-3.74274	0.563476	0.862896	down	80.3333	300.667	233	1	4	33	11	855
hsa-miR-novel-chr11_1898	hsa-mir-novel-chr11_1898	CUCGUCUGAUCUCGGAAG	-7.47059	0.242424	0.719487	down	79.3333	592.667	28	15	192	412	63	1300
hsa-miR-124-3p	hsa-mir-124-1	UAAGGCACGCGGUGAAUGCC	-2.9607	0.590752	0.886128	down	76.3333	226	221	3	2	54	8	613
hsa-miR-124-3p	hsa-mir-124-2	UAAGGCACGCGGUGAAUGCC	-2.9607	0.590752	0.886128	down	76.3333	226	221	3	2	54	8	613
hsa-miR-124-3p	hsa-mir-124-3	UAAGGCACGCGGUGAAUGCC	-2.9607	0.590752	0.886128	down	76.3333	226	221	3	2	54	8	613
hsa-miR-1298-5p	hsa-mir-1298	UUCAUUCGGCUGUCCAGAUGUA	-2.71006	0.228625	0.719487	down	56.3333	152.667	150	2	14	208	26	221
hsa-miR-204-5p	hsa-mir-204	UUCCCUUUGUCAUCCUAUGCCU	-2.36709	0.530902	0.832944	down	52.6667	124.667	146	2	7	82	25	264
hsa-miR-96-5p	hsa-mir-96	UUUGGCACUAGCACAUUUUUGCU	-2.34711	0.409059	0.719487	down	40.3333	94.6667	49	23	46	3	101	177
hsa-miR-195-5p	hsa-mir-195	UAGCAGCACAGAAAUAUUGGC	-2.07826	0.563386	0.862896	down	38.3333	79.6667	103	3	6	53	22	161
hsa-miR-novel-chr5_28105	hsa-mir-novel-chr5_28105	UGAGAUGAAGCACUGUAGCUCA	-2.40351	0.203951	0.719487	down	38	91.3333	39	15	57	48	59	164
hsa-miR-485-5p	hsa-mir-485	AGAGGCUGGCCGUGAUGAAUUC	-2.39048	0.396147	0.719487	down	35	83.6667	95	0	7	76	30	142
hsa-miR-410-3p	hsa-mir-410	AAUAUAACACAGAUGGCCUGU	-2.47573	0.633555	0.920828	down	34.3333	85	98		2	10	18	224
hsa-miR-708-3p	hsa-mir-708	CAACUAGACUGUGAGCUUCUAG	-2.47917	0.63961	0.924447	down	32	79.3333	93			16	5	214
hsa-miR-30e-3p	hsa-mir-30e	CUUUCAGUCGGAUGUUUACAGC	-2.92391	0.360869	0.719487	down	30.6667	89.6667	68	5	16	63	29	174
hsa-miR-4492	hsa-mir-4492	GGGGCUGGGCGCGCGCC	-2.275	0.299824	0.719487	down	26.6667	60.6667	35	0	42	118	11	50
hsa-miR-23b-3p	hsa-mir-23b	AUCACAUUGCCAGGGAUUACC	-5.39683	0.187019	0.719487	down	21	113.333	34	11	15	116	28	193
hsa-miR-30a-3p	hsa-mir-30a	CUUUCAGUCGGAUGUUUGCAGC	-4.12698	0.404464	0.719487	down	21	86.6667	48	2	10	33	25	199
hsa-miR-138-5p	hsa-mir-138-2	AGCUGGUGUUGUGAAUCAGGCCG	-2.67742	0.528101	0.831516	down	20.6667	55.3333	59	0	0	24	18	121
hsa-miR-138-5p	hsa-mir-138-1	AGCUGGUGUUGUGAAUCAGGCCG	-2.67742	0.528101	0.831516	down	20.6667	55.3333	59	0	0	24	18	121
hsa-miR-novel-chr17_11324	hsa-mir-novel-chr17_11324	UCUGAUCUCGGAAGCUAAGCAGG	-14.3404	0.200761	0.719487	down	15.6667	224.667	13	4	27	267	2	402
hsa-miR-199a-5p	hsa-mir-199a-1	CCCAGUGUUCAGACUACCUGUUC	-2.29787	0.0339342	0.719487	down	15.6667	36	15	7	22	37	33	35
hsa-miR-493-5p	hsa-mir-493	UUGUACAUGGUAGGCUUUCAUU	-2.42222	0.0375668	0.719487	down	15	36.3333	27	5	10	54	29	23
hsa-miR-novel-chr10_602	hsa-mir-novel-chr10_602	GCGGCUGGACGAGGCGC	-7.02632	0.0405468	0.719487	down	12.6667	89	11	0	24	118	54	92
hsa-miR-411-5p	hsa-mir-411	UAGUAGACCGUAUAGCGUACG	-5.72222	0.345757	0.719487	down	12	68.6667	30	0	3	34	17	152
hsa-miR-novel-chr11_1787	hsa-mir-novel-chr11_1787	AUAAGACAUGGGGAGCU	-2.17143	0.406917	0.719487	down	11.6667	25.3333	15	8	9	8	46	19
hsa-miR-29a-3p	hsa-mir-29a	UAGCACCAUCUGAAAUCGGUUA	-14.303	0.31768	0.719487	down	11	157.333	17	3	10	57	34	378
hsa-miR-382-3p	hsa-mir-382	AAUCAUUCACGGACAACACUU	-3.45455	0.510866	0.821276	down	11	38	28		2	11	4	96
hsa-miR-409-5p	hsa-mir-409	AGGUUACCCGAGCAACUUUGCAU	-3.875	0.390474	0.719487	down	10.6667	41.3333	25	0	4	30		91
hsa-miR-487b-3p	hsa-mir-487b	AAUCGUACAGGGUCAUCCACUU	-3.25806	0.38836	0.719487	down	10.3333	33.6667	25		3	26	3	69
hsa-miR-novel-chr2_21492	hsa-mir-novel-chr2_21492	AGCUGGGUUCAGAACGU	-2.67742	0.42265	0.719487	down	10.3333	27.6667	11	3	14	59	19	2
hsa-miR-novel-chr9_36318	hsa-mir-novel-chr9_36318	GUGGGUGGUGGUGCAUG	-38.2069	0.278629	0.719487	down	9.66667	369.333	4	3	19	838	25	242
hsa-miR-novel-chr8_35011	hsa-mir-novel-chr8_35011	ACUGGUCUGGCUGAGCCU	-4.72414	0.276227	0.719487	down	9.66667	45.6667	6	19	1	44	12	78
hsa-miR-145-5p	hsa-mir-145	GUCCAGUUUUCCCAGGAAUCCCU	-2.55172	0.413304	0.719487	down	9.66667	24.6667	18	4	4	15	8	48
hsa-miR-novel-chr4_26712	hsa-mir-novel-chr4_26712	UGGAGAGAUGGCUCAGC	-2.75	0.0967646	0.719487	down	9.33333	25.6667	18		7	44	16	14
hsa-miR-135b-5p	hsa-mir-135b	UAUGGCUUUUCAUUCCUAUGUGA	-2.46429	0.33074	0.719487	down	9.33333	23	21	0	4	22	5	39
hsa-miR-novel-chr11_3489	hsa-mir-novel-chr11_3489	AGCUUGACUCUAGUCUG	-91.4231	0.349316	0.719487	down	8.66667	792.333	7	5	11	2083	98	193
hsa-miR-10b-5p	hsa-mir-10b	UACCCUGUAGAACCGAAUUUGUG	-4.875	0.0935776	0.719487	down	8	39	10	2	9	57	36	21
hsa-miR-novel-chr8_34288	hsa-mir-novel-chr8_34288	CUGGGGAUAGAGCAUUG	-4.375	0.457572	0.760081	down	8	35	9	1	11	10	87	5
hsa-miR-330-5p	hsa-mir-330	UCUCUGGGCCUGUGUCUUAGGC	-3.82609	0.289395	0.719487	down	7.66667	29.3333	14		6	20	7	58
hsa-miR-181a-3p	hsa-mir-181a-1	ACCAUCGACCGUUGAUUGUACC	-3.17391	0.319208	0.719487	down	7.66667	24.3333	13	2	5	18	5	47
hsa-miR-30c-2-3p	hsa-mir-30c-2	CUGGGAGAAGGCUGUUUACUCU	-3.13636	0.38408	0.719487	down	7.33333	23	13		6	14	2	50
hsa-miR-1307-5p	hsa-mir-1307	UCGACCGGACCUCGACCGGCU	-2.42857	0.531021	0.832944	down	7	17	2	8	8	4	44
hsa-miR-novel-chr10_251	hsa-mir-novel-chr10_251	UUCUGCCCAGUGCUCUG	-20.9	0.279135	0.719487	down	6.66667	139.333	11	3	3	322	23	70
hsa-miR-novel-chr10_252	hsa-mir-novel-chr10_252	UUCUGCCCAGUGCUCUG	-20.9	0.279135	0.719487	down	6.66667	139.333	11	3	3	322	23	70
hsa-miR-novel-chr22_20003	hsa-mir-novel-chr22_20003	CUCUCCAGCCACCUUUUU	-2.15	0.494841	0.80138	down	6.66667	14.3333	16	1		7	24	9
hsa-miR-novel-chr6_30248	hsa-mir-novel-chr6_30248	UGGGUGGUGGUGCAUGG	-10.5789	0.206004	0.719487	down	6.33333	67	3	1	12	124	9	65
hsa-miR-493-3p	hsa-mir-493	UGAAGGUCUACUGUGUGCCAGG	-3.31579	0.148476	0.719487	down	6.33333	21	2	3	11	27	19	14
hsa-miR-576-3p	hsa-mir-576	AAGAUGUGGAAAAAUUGGAAUC	-2.26316	0.588524	0.886128	down	6.33333	14.3333	3	5	8		38	2
hsa-miR-novel-chr14_7636	hsa-mir-novel-chr14_7636	CUUCUCGGGGUGGGGGGG	-4.94118	0.0869765	0.719487	down	5.66667	28	4	0	10	37	9	35
hsa-miR-135a-5p	hsa-mir-135a-1	UAUGGCUUUUUAUUCCUAUGUGA	-3.94118	0.333155	0.719487	down	5.66667	22.3333	14	0	0	18	3	43
hsa-miR-135a-5p	hsa-mir-135a-2	UAUGGCUUUUUAUUCCUAUGUGA	-3.94118	0.333155	0.719487	down	5.66667	22.3333	14	0	0	18	3	43
hsa-miR-novel-chr19_13276	hsa-mir-novel-chr19_13276	GCGGAAAGGGGGGCGGU	-3.29412	0.0658515	0.719487	down	5.66667	18.6667	4	1	9	10	17	26
hsa-miR-137	hsa-mir-137	UUAUUGCUUAAGAAUACGCGUAG	-4.125	0.337385	0.719487	down	5.33333	22	12	0	1	19		44
hsa-miR-novel-chr6_30144	hsa-mir-novel-chr6_30144	GUGGGGGCGCGCGGGCG	-3.125	0.38776	0.719487	down	5.33333	16.6667	7		6	39		8
hsa-let-7e-3p	hsa-let-7e	CUAUACGGCCUCCUAGCUUUCC	-2.4	0.442522	0.742949	down	5	12	12	0		8	4	21
hsa-miR-107	hsa-mir-107	AGCAGCAUUGUACAGGGCUAUCA	-5.85714	0.221317	0.719487	down	4.66667	27.3333	9	2		27	5	47
hsa-miR-153-3p	hsa-mir-153-1	UUGCAUAGUCACAAAAGUGAUC	-2.14286	0.620977	0.920151	down	4.66667	10	11	0		3	1	23
hsa-miR-153-3p	hsa-mir-153-2	UUGCAUAGUCACAAAAGUGAUC	-2.14286	0.620977	0.920151	down	4.66667	10	11	0		3	1	23
hsa-miR-129-2-3p	hsa-mir-129-2	AAGCCCUUACCCCAAAAAGCAU	-4.16667	0.309661	0.719487	down	4	16.6667	9			16		31
hsa-miR-125b-1-3p	hsa-mir-125b-1	ACGGGUUAGGCUCUUGGGAGCU	-2.75	0.0782023	0.719487	down	4	11	7	2		10	10	10
hsa-miR-novel-chr3_25421	hsa-mir-novel-chr3_25421	AGCUUGACUGUGAGACUG	-2.16667	0.436837	0.736786	down	4	8.66667	1	1	7	10	11	2
hsa-miR-novel-chr16_9991	hsa-mir-novel-chr16_9991	AGGGACAGUGCCUGGUG	-2.63636	0.389743	0.719487	down	3.66667	9.66667	7	0	1	24		2
hsa-miR-novel-chr20_17674	hsa-mir-novel-chr20_17674	AGGAGCACGGCUGGAUAG	-2.45455	0.385524	0.719487	down	3.66667	9	8			23		1
hsa-miR-novel-chr15_8797	hsa-mir-novel-chr15_8797	UUCUGGGCUGUAGUGCG	-39	0.308373	0.719487	down	3.33333	130	6	0	1	318	12	57
hsa-miR-433-5p	hsa-mir-433	UACGGUGAGCCUGUCAUUAUUC	-4.5	0.247442	0.719487	down	3.33333	15	5		2	11	3	28
hsa-miR-novel-chr5_28102	hsa-mir-novel-chr5_28102	AAAGAACUUUGAAAAGAG	-4.4	0.310275	0.719487	down	3.33333	14.6667	3	1	3	31	2	8
hsa-miR-6087	hsa-mir-6087	UGAGGCGGGGGGGCGAGC	-3	0.502173	0.810862	down	3.33333	10	1		6	24		3
hsa-miR-377-5p	hsa-mir-377	AGAGGUUGCCCUUGGUGAAUUC	-2.4	0.528595	0.831516	down	3.33333	8	7				7	14
hsa-miR-novel-chr21_19107	hsa-mir-novel-chr21_19107	CGGGGGGCGGGGCGGAC	-4.22222	0.174121	0.719487	down	3	12.6667	2		4	13	1	21
hsa-miR-novel-chr21_19108	hsa-mir-novel-chr21_19108	CGGGGGGCGGGGCGGAC	-4.22222	0.174121	0.719487	down	3	12.6667	2		4	13	1	21
hsa-miR-27b-5p	hsa-mir-27b	AGAGCUUAGCUGAUUGGUGAAC	-3.22222	0.225016	0.719487	down	3	9.66667	6	0		7	5	14
hsa-miR-542-3p	hsa-mir-542	UGUGACAGAUUGAUAACUGAAA	-2.11111	0.404509	0.719487	down	3	6.33333	3	2	1	12		4
hsa-miR-1249-3p	hsa-mir-1249	ACGCCCUUCCCCCCCUUCUUCA	-13.375	0.22583	0.719487	down	2.66667	35.6667	4	1		3	36	65
hsa-miR-novel-chr17_10858	hsa-mir-novel-chr17_10858	ACGGUCUGGGGAAAGGCUCCU	-2.5	0.252913	0.719487	down	2.66667	6.66667	3	1	1	10		7
hsa-miR-450a-5p	hsa-mir-450a-1	UUUUGCGAUGUGUUCCUAAUAU	-2	0.431465	0.732223	down	2.66667	5.33333	3	1	1	11		2
hsa-miR-450a-5p	hsa-mir-450a-2	UUUUGCGAUGUGUUCCUAAUAU	-2	0.431465	0.732223	down	2.66667	5.33333	3	1	1	11		2
hsa-miR-novel-chr15_8803	hsa-mir-novel-chr15_8803	GGCUGGACUGAGUGGGG	-30.8571	0.400279	0.719487	down	2.33333	72	1		3		9	204
hsa-miR-29b-3p	hsa-mir-29b-1	UAGCACCAUUUGAAAUCAGUGUU	-5	0.0991148	0.719487	down	2.33333	11.6667	2	0	2	6	9	17
hsa-miR-29b-3p	hsa-mir-29b-2	UAGCACCAUUUGAAAUCAGUGUU	-5	0.0991148	0.719487	down	2.33333	11.6667	2	0	2	6	9	17
hsa-miR-889-3p	hsa-mir-889	UUAAUAUCGGACAACCAUUGU	-4.28571	0.242124	0.719487	down	2.33333	10	1	2	1	18	5	4
hsa-miR-491-5p	hsa-mir-491	AGUGGGGAACCCUUCCAUGAGG	-2.85714	0.42265	0.719487	down	2.33333	6.66667	3	1			5	12
hsa-miR-374b-3p	hsa-mir-374b	CUUAGCAGGUUGUAUUAUCAUU	-2.42857	0.439228	0.739429	down	2.33333	5.66667	3	1			10	4
hsa-miR-novel-chr8_33845	hsa-mir-novel-chr8_33845	AGUACUUGGAUGGGAGA	-22	0.173873	0.719487	down	2	44	0	2	1	71	5	53
hsa-miR-novel-chr22_19474	hsa-mir-novel-chr22_19474	AUGCUGGGGUCGGUGGU	-3.5	0.492327	0.798486	down	2	7	1	1	1	18
hsa-miR-novel-chr2_20466	hsa-mir-novel-chr2_20466	CCAAGGAAGGCAGCAGGC	-19.8	0.255654	0.719487	down	1.66667	33	1	1		71	5	20
hsa-miR-novel-chr8_34216	hsa-mir-novel-chr8_34216	AGGCCAAGGAGAACUGG	-6.4	0.22155	0.719487	down	1.66667	10.6667	1		1	3	19	7
hsa-miR-novel-chr16_9829	hsa-mir-novel-chr16_9829	ACAUCCUGGGGCUGGAG	-5.6	0.137433	0.719487	down	1.66667	9.33333	2			15	8	2
hsa-miR-novel-chr7_31552	hsa-mir-novel-chr7_31552	CUCCCCUCUCCCCGCGG	-5.6	0.370512	0.719487	down	1.66667	9.33333	1		1	22		3
hsa-miR-novel-chr13_6413	hsa-mir-novel-chr13_6413	AGAUUUGAGAGGGGCUG	-4.6	0.453793	0.754946	down	1.66667	7.66667	1		1	20
hsa-miR-novel-chr19_13751	hsa-mir-novel-chr19_13751	ACUGCACUCCAGCCUGGGC	-4	0.199359	0.719487	down	1.66667	6.66667	1	0	1	10		7
hsa-miR-143-5p	hsa-mir-143	GGUGCAGUGCUGCAUCUCUGGU	-3.4	0.183503	0.719487	down	1.66667	5.66667	1	0	1	3	8	3
hsa-miR-548ar-3p	hsa-mir-548ar	UAAAACUGCAGUUAUUUUUGC	-3.2	0.47259	0.776803	down	1.66667	5.33333	1	1			13
hsa-miR-215-5p	hsa-mir-215	AUGACCUAUGAAUUGACAGAC	-2.6	0.547089	0.847255	down	1.66667	4.33333	2		0		10
hsa-miR-505-3p	hsa-mir-505	CGUCAACACUUGCUGGUUUCCU	-2.6	0.207882	0.719487	down	1.66667	4.33333	0	2		5	5
hsa-miR-485-3p	hsa-mir-485	GUCAUACACGGCUCUCCUCUCU	-2.4	0.335589	0.719487	down	1.66667	4	2			3		6
hsa-miR-30d-3p	hsa-mir-30d	CUUUCAGUCAGAUGUUUGCUGC	-2.2	0.42265	0.719487	down	1.66667	3.66667	0		2			8
hsa-miR-novel-chr6_29883	hsa-mir-novel-chr6_29883	UUUGGUCCCCUUCAACCAGCU	-2.2	0.579916	0.879486	down	1.66667	3.66667	2					8
hsa-miR-novel-chr5_29215	hsa-mir-novel-chr5_29215	GCCGGUAGGUGUAGGCGCAGC	-12.25	0.086565	0.719487	down	1.33333	16.3333	1	0	0	18	22	6
hsa-miR-154-3p	hsa-mir-154	AAUCAUACACGGUUGACCUAUU	-5	0.102765	0.719487	down	1.33333	6.66667	0		1	4	3	10
hsa-miR-novel-chr4_26334	hsa-mir-novel-chr4_26334	CGGUGGGGAAGGUGGCU	-4.75	0.0820149	0.719487	down	1.33333	6.33333		1		3	5	8
hsa-miR-novel-chr14_7533	hsa-mir-novel-chr14_7533	CCCGGAUGAUCCUCAGUG	-4	0.225403	0.719487	down	1.33333	5.33333	1			5	8
hsa-miR-30c-1-3p	hsa-mir-30c-1	CUGGGAGAGGGUUGUUUACUCC	-2.5	0.320634	0.719487	down	1.33333	3.33333	1				4	3
hsa-miR-378g	hsa-mir-378g	ACUGGGCUUGGAGUCAGAAG	-2.5	0.225403	0.719487	down	1.33333	3.33333	1	0		3		4
hsa-miR-195-3p	hsa-mir-195	CCAAUAUUGGCUGUGCUGCUCC	-2.25	0.525421	0.831516	down	1.33333	3	1					6
hsa-miR-378d	hsa-mir-378d-2	ACUGGACUUGGAGUCAGAAA	-2.25	0.370059	0.719487	down	1.33333	3	1				2	4
hsa-miR-378d	hsa-mir-378d-1	ACUGGACUUGGAGUCAGAAA	-2.25	0.370059	0.719487	down	1.33333	3	1				2	4
hsa-let-7g-3p	hsa-let-7g	CUGUACAGGCCACUGCCUUGC	-2	0.547089	0.847255	down	1.33333	2.66667		0	1		5
hsa-miR-21-3p	hsa-mir-21	CAACACCAGUCGAUGGGCUGU	-2	0.547089	0.847255	down	1.33333	2.66667		1		5
hsa-miR-431-5p	hsa-mir-431	UGUCUUGCAGGCCGUCAUGCA	-2	0.183503	0.719487	down	1.33333	2.66667	1			3		2
hsa-miR-novel-chr14_7397	hsa-mir-novel-chr14_7397	GAGGCUGAAGAAAAGGAAG	-2	0.547089	0.847255	down	1.33333	2.66667	0		1		5
hsa-miR-novel-chr8_33880	hsa-mir-novel-chr8_33880	UGAGGACUGGGACAAGCC	-2	0.547089	0.847255	down	1.33333	2.66667			1	5
hsa-miR-novel-chr2_20308	hsa-mir-novel-chr2_20308	GUGGAGGGCAAGUCUGG	-40	0.19816	0.719487	down	1	40				73	2	42
hsa-miR-novel-chr7_32369	hsa-mir-novel-chr7_32369	GGGGGCUUGGCUCAGUUG	-11.3333	0.42265	0.719487	down	1	11.3333				31
hsa-miR-novel-chr18_12079	hsa-mir-novel-chr18_12079	GGUGGGGGCGCGCGGGC	-6	0.29986	0.719487	down	1	6	0			3		12
hsa-miR-novel-chr6_30407	hsa-mir-novel-chr6_30407	AAGGCUGUUUGCUUGUCC	-4.33333	0.42265	0.719487	down	1	4.33333				10
hsa-miR-412-5p	hsa-mir-412	UGGUCGACCAGUUGGAAAGUAAU	-3.66667	0.42265	0.719487	down	1	3.66667				8
hsa-miR-205-5p	hsa-mir-205	UCCUUCAUUCCACCGGAGUCUG	-3.33333	0.19171	0.719487	down	1	3.33333	0	0			4	3
hsa-miR-31-5p	hsa-mir-31	AGGCAAGAUGCUGGCAUAGCU	-3.33333	0.249521	0.719487	down	1	3.33333				5		2
hsa-miR-3607-3p	hsa-mir-3607	ACUGUAAACGCUUUCUGAUG	-3.33333	0.42265	0.719487	down	1	3.33333					7
hsa-miR-429	hsa-mir-429	UAAUACUGUCUGGUAAAACCGU	-3.33333	0.19171	0.719487	down	1	3.33333	0			3	4
hsa-miR-novel-chr10_1232	hsa-mir-novel-chr10_1232	GGUGCUUGGCUGAGGGGC	-3.33333	0.19171	0.719487	down	1	3.33333				4		3
hsa-miR-novel-chr1_13881	hsa-mir-novel-chr1_13881	AGGGCUGCUGGUGGUCAGC	-3.33333	0.42265	0.719487	down	1	3.33333					7
hsa-miR-novel-chr7_32523	hsa-mir-novel-chr7_32523	UGGAAUGGCCUGAAGGUGGA	-3.33333	0.42265	0.719487	down	1	3.33333		0			7
hsa-miR-3688-3p	hsa-mir-3688-1	UAUGGAAAGACUUUGCCACUCU	-3	0.225403	0.719487	down	1	3	0	0	0	2	4
hsa-miR-3688-3p	hsa-mir-3688-2	UAUGGAAAGACUUUGCCACUCU	-3	0.225403	0.719487	down	1	3	0	0	0	2	4
hsa-miR-novel-chr4_25596	hsa-mir-novel-chr4_25596	GGCGGCGGCGGCUUCGGC	-3	0.320634	0.719487	down	1	3				5		1
hsa-miR-novel-chr7_33295	hsa-mir-novel-chr7_33295	AGAGAACUGGAAGAGAGA	-3	0.42265	0.719487	down	1	3					6
hsa-miR-4665-5p	hsa-mir-4665	CUGGGGGACGCGUGAGCGCGAGC	-2.66667	0.42265	0.719487	down	1	2.66667					5
hsa-miR-novel-chr13_5556	hsa-mir-novel-chr13_5556	GCACGUGAAACCUUGUC	-2.66667	0.42265	0.719487	down	1	2.66667					5
hsa-miR-novel-chr18_11985	hsa-mir-novel-chr18_11985	ACGUGAAACCCUGUCUG	-2.66667	0.42265	0.719487	down	1	2.66667	0			5
hsa-miR-novel-chr1_17046	hsa-mir-novel-chr1_17046	ACGUGAAACCCUGUCUG	-2.66667	0.42265	0.719487	down	1	2.66667	0			5
hsa-miR-novel-chr21_19181	hsa-mir-novel-chr21_19181	CAUUGUCCUGGCGUUGACCUUGUAC	-2.66667	0.42265	0.719487	down	1	2.66667					5
hsa-miR-novel-chr3_24697	hsa-mir-novel-chr3_24697	GAGGACCCAGAGAAGGAG	-2.66667	0.42265	0.719487	down	1	2.66667					5
hsa-miR-novel-chr8_34237	hsa-mir-novel-chr8_34237	UGGCUGACCUGGAGGAUC	-2.66667	0.42265	0.719487	down	1	2.66667					5
hsa-miR-novel-chrX_37306	hsa-mir-novel-chrX_37306	GGCAGCAGGGCUGUGGCAGC	-2.66667	0.42265	0.719487	down	1	2.66667				5
hsa-miR-29c-3p	hsa-mir-29c	UAGCACCAUUUGAAAUCGGUUA	-2.33333	0.42265	0.719487	down	1	2.33333						4
hsa-miR-3200-5p	hsa-mir-3200	AAUCUGAGAAGGCGCACAAGGU	-2.33333	0.42265	0.719487	down	1	2.33333		0			4
hsa-miR-92a-1-5p	hsa-mir-92a-1	AGGUUGGGAUCGGUUGCAAUGCU	-2.33333	0.42265	0.719487	down	1	2.33333	0				4
hsa-miR-novel-chr12_4555	hsa-mir-novel-chr12_4555	AGCAGUGGAGCCUGCGGC	-2.33333	0.42265	0.719487	down	1	2.33333				4
hsa-miR-novel-chr15_8117	hsa-mir-novel-chr15_8117	GUGGAGCCUGUGGCCUA	-2.33333	0.42265	0.719487	down	1	2.33333				4
hsa-miR-novel-chr1_15570	hsa-mir-novel-chr1_15570	UAGGGUAUUUAGCUGUUAACU	-2.33333	0.183503	0.719487	down	1	2.33333	0			2		2
hsa-miR-novel-chr2_21244	hsa-mir-novel-chr2_21244	UAGGGUAUUUAGCUGUUAACU	-2.33333	0.183503	0.719487	down	1	2.33333	0			2		2
hsa-miR-novel-chr7_32071	hsa-mir-novel-chr7_32071	GUUGUUGCCAUGGUAAU	-2.33333	0.42265	0.719487	down	1	2.33333					4
hsa-miR-novel-chr7_33361	hsa-mir-novel-chr7_33361	CUGCUGAGGCUCAGCUCU	-2.33333	0.42265	0.719487	down	1	2.33333						4
hsa-miR-novel-chrX_38408	hsa-mir-novel-chrX_38408	UGAUUGUAGCCUUUUGGAGU	-2.33333	0.42265	0.719487	down	1	2.33333					4
hsa-miR-2682-5p	hsa-mir-2682	CAGGCAGUGACUGUUCAGACGUC	-2	0.42265	0.719487	down	1	2				3
hsa-miR-299-3p	hsa-mir-299	UAUGUGGGAUGGUAAACCGCUU	-2	0.42265	0.719487	down	1	2				3
hsa-miR-3165	hsa-mir-3165	AGGUGGAUGCAAUGUGACCUCA	-2	0.42265	0.719487	down	1	2		0			3
hsa-miR-379-3p	hsa-mir-379	UAUGUAACAUGGUCCACUAACU	-2	0.42265	0.719487	down	1	2						3
hsa-miR-4772-3p	hsa-mir-4772	CCUGCAACUUUGCCUGAUCAGA	-2	0.42265	0.719487	down	1	2					3
hsa-miR-487a-3p	hsa-mir-487a	AAUCAUACAGGGACAUCCAGUU	-2	0.42265	0.719487	down	1	2				3
hsa-miR-548at-5p	hsa-mir-548at	AAAAGUUAUUGCGGUUUUGGCU	-2	0.42265	0.719487	down	1	2					3
hsa-miR-548u	hsa-mir-548u	CAAAGACUGCAAUUACUUUUGCG	-2	0.42265	0.719487	down	1	2	0				3
hsa-miR-656-3p	hsa-mir-656	AAUAUUAUACAGUCAACCUCU	-2	0.42265	0.719487	down	1	2	0			3
hsa-miR-novel-chr10_1711	hsa-mir-novel-chr10_1711	UGUGCAGCAGGCCAACCGAGAA	-2	0.42265	0.719487	down	1	2					3
hsa-miR-novel-chr12_4549	hsa-mir-novel-chr12_4549	UGGGGCGUCGCCAAGUGG	-2	0.42265	0.719487	down	1	2				3
hsa-miR-novel-chr12_4550	hsa-mir-novel-chr12_4550	UGGGGCGUCGCCAAGUGG	-2	0.42265	0.719487	down	1	2				3
hsa-miR-novel-chr1_14263	hsa-mir-novel-chr1_14263	UGAGUGUUGUCUACGAGGG	-2	0.42265	0.719487	down	1	2					3
hsa-miR-novel-chr22_20056	hsa-mir-novel-chr22_20056	AGGGAGGCUGAGAAACGG	-2	0.42265	0.719487	down	1	2						3
hsa-miR-novel-chr7_31626	hsa-mir-novel-chr7_31626	CCACUGCACUCCAGCCUG	-2	0.42265	0.719487	down	1	2				3
hsa-miR-novel-chr7_32595	hsa-mir-novel-chr7_32595	CCACUGCACUCCAGCCUG	-2	0.42265	0.719487	down	1	2				3
